# Supplementary material for: Seaweed Fermentation Modulates Gut Microbiome Composition Without Altering Metabolite Output In Vitro
Source: Research Square preprint supplement (doi:10.21203/rs.3.rs-7794319/v1), 2025-11-20
Supplement: Supplementary file 1 [file 9db453de52d4edd33f02c496.xlsx]

## Sheet: Content
Seaweed Fermentation Modulates Gut Microbiota Composition Without Impacting Metabolites Output In Vitro
Supplementary Table 1	List of primers used for polymerase chain reaction
Supplementary Table 2	ASV file for all samples on genus level
Supplementary Table 3	PERMANOVA for beta diversity analysis, comparing medium
Supplementary Table 4	PERMANOVA for beta diversity analysis, comparing donors
Supplementary Table 5	ASV file for Bacteroides
Supplementary Table 6	Raw data of lactic acid measurements
Supplementary Table 7	Raw data of short-chain fatty acids
Supplementary Table 8	Raw data for pH measurements + statistical analyses with emmeans with FDR correction within medium and time

## Sheet: Table S1
Primer	Sequence 5'-3'	IonXpress number	Barcode
PBR_P1	CCTCTCTATGGGCAGTCGGTGATattaccgcggctgctgg
PBU	CCTACGGGAGGCAGCAG
PBR	attaccgcggctgctgg
PBU_1	CCATCTCATCCCTGCGTGTCTCCGACtcagCTAAGGTAACgatCCTACGGGAGGCAGCAG	IonXpress_1	CTAAGGTAAC
PBU_2	CCATCTCATCCCTGCGTGTCTCCGACtcagTAAGGAGAACgatCCTACGGGAGGCAGCAG	IonXpress_2	TAAGGAGAAC
PBU_3	CCATCTCATCCCTGCGTGTCTCCGACtcagAAGAGGATTCgatCCTACGGGAGGCAGCAG	IonXpress_3	AAGAGGATTC
PBU_4	CCATCTCATCCCTGCGTGTCTCCGACtcagTACCAAGATCgatCCTACGGGAGGCAGCAG	IonXpress_4	TACCAAGATC
PBU_5	CCATCTCATCCCTGCGTGTCTCCGACtcagCAGAAGGAACgatCCTACGGGAGGCAGCAG	IonXpress_5	CAGAAGGAAC
PBU_6	CCATCTCATCCCTGCGTGTCTCCGACtcagCTGCAAGTTCgatCCTACGGGAGGCAGCAG	IonXpress_6	CTGCAAGTTC
PBU_7	CCATCTCATCCCTGCGTGTCTCCGACtcagTTCGTGATTCgatCCTACGGGAGGCAGCAG	IonXpress_7	TTCGTGATTC
PBU_8	CCATCTCATCCCTGCGTGTCTCCGACtcagTTCCGATAACgatCCTACGGGAGGCAGCAG	IonXpress_8	TTCCGATAAC
PBU_9	CCATCTCATCCCTGCGTGTCTCCGACtcagTGAGCGGAACgatCCTACGGGAGGCAGCAG	IonXpress_9	TGAGCGGAAC
PBU_10	CCATCTCATCCCTGCGTGTCTCCGACtcagCTGACCGAACgatCCTACGGGAGGCAGCAG	IonXpress_10	CTGACCGAAC
PBU_11	CCATCTCATCCCTGCGTGTCTCCGACtcagTCCTCGAATCgatCCTACGGGAGGCAGCAG	IonXpress_11	TCCTCGAATC
PBU_12	CCATCTCATCCCTGCGTGTCTCCGACtcagTAGGTGGTTCgatCCTACGGGAGGCAGCAG	IonXpress_12	TAGGTGGTTC
PBU_13	CCATCTCATCCCTGCGTGTCTCCGACtcagTCTAACGGACgatCCTACGGGAGGCAGCAG	IonXpress_13	TCTAACGGAC
PBU_14	CCATCTCATCCCTGCGTGTCTCCGACtcagTTGGAGTGTCgatCCTACGGGAGGCAGCAG	IonXpress_14	TTGGAGTGTC
PBU_15	CCATCTCATCCCTGCGTGTCTCCGACtcagTCTAGAGGTCgatCCTACGGGAGGCAGCAG	IonXpress_15	TCTAGAGGTC
PBU_16	CCATCTCATCCCTGCGTGTCTCCGACtcagTCTGGATGACgatCCTACGGGAGGCAGCAG	IonXpress_16	TCTGGATGAC
PBU_17	CCATCTCATCCCTGCGTGTCTCCGACtcagTCTATTCGTCgatCCTACGGGAGGCAGCAG	IonXpress_17	TCTATTCGTC
PBU_18	CCATCTCATCCCTGCGTGTCTCCGACtcagAGGCAATTGCgatCCTACGGGAGGCAGCAG	IonXpress_18	AGGCAATTGC
PBU_19	CCATCTCATCCCTGCGTGTCTCCGACtcagTTAGTCGGACgatCCTACGGGAGGCAGCAG	IonXpress_19	TTAGTCGGAC
PBU_20	CCATCTCATCCCTGCGTGTCTCCGACtcagCAGATCCATCgatCCTACGGGAGGCAGCAG	IonXpress_20	CAGATCCATC
PBU_21	CCATCTCATCCCTGCGTGTCTCCGACtcagTCGCAATTACgatCCTACGGGAGGCAGCAG	IonXpress_21	TCGCAATTAC
PBU_22	CCATCTCATCCCTGCGTGTCTCCGACtcagTTCGAGACGCgatCCTACGGGAGGCAGCAG	IonXpress_22	TTCGAGACGC
PBU_23	CCATCTCATCCCTGCGTGTCTCCGACtcagTGCCACGAACgatCCTACGGGAGGCAGCAG	IonXpress_23	TGCCACGAAC
PBU_24	CCATCTCATCCCTGCGTGTCTCCGACtcagAACCTCATTCgatCCTACGGGAGGCAGCAG	IonXpress_24	AACCTCATTC
PBU_25	CCATCTCATCCCTGCGTGTCTCCGACtcagCCTGAGATACgatCCTACGGGAGGCAGCAG	IonXpress_25	CCTGAGATAC
PBU_26	CCATCTCATCCCTGCGTGTCTCCGACtcagTTACAACCTCgatCCTACGGGAGGCAGCAG	IonXpress_26	TTACAACCTC
PBU_27	CCATCTCATCCCTGCGTGTCTCCGACtcagAACCATCCGCgatCCTACGGGAGGCAGCAG	IonXpress_27	AACCATCCGC
PBU_28	CCATCTCATCCCTGCGTGTCTCCGACtcagATCCGGAATCgatCCTACGGGAGGCAGCAG	IonXpress_28	ATCCGGAATC
PBU_29	CCATCTCATCCCTGCGTGTCTCCGACtcagTCGACCACTCgatCCTACGGGAGGCAGCAG	IonXpress_29	TCGACCACTC
PBU_30	CCATCTCATCCCTGCGTGTCTCCGACtcagCGAGGTTATCgatCCTACGGGAGGCAGCAG	IonXpress_30	CGAGGTTATC
PBU_31	CCATCTCATCCCTGCGTGTCTCCGACtcagTCCAAGCTGCgatCCTACGGGAGGCAGCAG	IonXpress_31	TCCAAGCTGC
PBU_32	CCATCTCATCCCTGCGTGTCTCCGACtcagTCTTACACACgatCCTACGGGAGGCAGCAG	IonXpress_32	TCTTACACAC
PBU_33	CCATCTCATCCCTGCGTGTCTCCGACtcagAGCACGAATCgatCCTACGGGAGGCAGCAG	IonXpress_42	AGCACGAATC
PBU_34	CCATCTCATCCCTGCGTGTCTCCGACtcagTTCAATTGGCgatCCTACGGGAGGCAGCAG	IonXpress_69	TTCAATTGGC
PBU_35	CCATCTCATCCCTGCGTGTCTCCGACtcagCCTACTGGTCgatCCTACGGGAGGCAGCAG	IonXpress_70	CCTACTGGTC
PBU_36	CCATCTCATCCCTGCGTGTCTCCGACtcagTCTGCCTGTCgatCCTACGGGAGGCAGCAG	IonXpress_73	TCTGCCTGTC
PBU_37	CCATCTCATCCCTGCGTGTCTCCGACtcagCGATCGGTTCgatCCTACGGGAGGCAGCAG	IonXpress_74	CGATCGGTTC
PBU_38	CCATCTCATCCCTGCGTGTCTCCGACtcagTCAGGAATACgatCCTACGGGAGGCAGCAG	IonXpress_75	TCAGGAATAC
PBU_39	CCATCTCATCCCTGCGTGTCTCCGACtcagCCTGGTTGTCgatCCTACGGGAGGCAGCAG	IonXpress_79	CCTGGTTGTC
PBU_40	CCATCTCATCCCTGCGTGTCTCCGACtcagTTGGCATCTCgatCCTACGGGAGGCAGCAG	IonXpress_82	TTGGCATCTC
PBU_41	CCATCTCATCCCTGCGTGTCTCCGACtcagCTTCCATAACgatCCTACGGGAGGCAGCAG	IonXpress_84	CTTCCATAAC
PBU_42	CCATCTCATCCCTGCGTGTCTCCGACtcagTTGGCTGGACgatCCTACGGGAGGCAGCAG	IonXpress_87	TTGGCTGGAC
PBU_43	CCATCTCATCCCTGCGTGTCTCCGACtcagTCCGACAAGCgatCCTACGGGAGGCAGCAG	IonXpress_94	TCCGACAAGC
PBU_44	CCATCTCATCCCTGCGTGTCTCCGACtcagCGGACAGATCgatCCTACGGGAGGCAGCAG	IonXpress_95	CGGACAGATC
PBU_45	CCATCTCATCCCTGCGTGTCTCCGACtcagTTAAGCGGTCgatCCTACGGGAGGCAGCAG	IonXpress_96	TTAAGCGGTC
PBU_46	CCATCTCATCCCTGCGTGTCTCCGACtcagTAACAATCGGCgatCCTACGGGAGGCAGCAG	IonXpress_39	TAACAATCGGC
PBU_47	CCATCTCATCCCTGCGTGTCTCCGACtcagCTGACATAATCgatCCTACGGGAGGCAGCAG	IonXpress_40	CTGACATAATC
PBU_48	CCATCTCATCCCTGCGTGTCTCCGACtcagTTCCACTTCGCgatCCTACGGGAGGCAGCAG	IonXpress_41	TTCCACTTCGC
PBU_49	CCATCTCATCCCTGCGTGTCTCCGACtcagTTCTCATTGAACgatCCTACGGGAGGCAGCAG	IonXpress_33	TTCTCATTGAAC
PBU_50	CCATCTCATCCCTGCGTGTCTCCGACtcagTCGCATCGTTCgatCCTACGGGAGGCAGCAG	IonXpress_34	TCGCATCGTTC
PBU_51	CCATCTCATCCCTGCGTGTCTCCGACtcagTAAGCCATTGTCgatCCTACGGGAGGCAGCAG	IonXpress_35	TAAGCCATTGTC
PBU_52	CCATCTCATCCCTGCGTGTCTCCGACtcagAAGGAATCGTCgatCCTACGGGAGGCAGCAG	IonXpress_36	AAGGAATCGTC
PBU_53	CCATCTCATCCCTGCGTGTCTCCGACtcagCTTGAGAATGTCgatCCTACGGGAGGCAGCAG	IonXpress_37	CTTGAGAATGTC
PBU_54	CCATCTCATCCCTGCGTGTCTCCGACtcagTGGAGGACGGACgatCCTACGGGAGGCAGCAG	IonXpress_38	TGGAGGACGGAC
PBU_55	CCATCTCATCCCTGCGTGTCTCCGACtcagCTTGACACCGCgatCCTACGGGAGGCAGCAG	IonXpress_43	CTTGACACCGC
PBU_56	CCATCTCATCCCTGCGTGTCTCCGACtcagTTGGAGGCCAGCgatCCTACGGGAGGCAGCAG	IonXpress_44	TTGGAGGCCAGC
PBU_57	CCATCTCATCCCTGCGTGTCTCCGACtcagTGGAGCTTCCTCgatCCTACGGGAGGCAGCAG	IonXpress_45	TGGAGCTTCCTC
PBU_58	CCATCTCATCCCTGCGTGTCTCCGACtcagTCAGTCCGAACgatCCTACGGGAGGCAGCAG	IonXpress_46	TCAGTCCGAAC
PBU_59	CCATCTCATCCCTGCGTGTCTCCGACtcagTAAGGCAACCACgatCCTACGGGAGGCAGCAG	IonXpress_47	TAAGGCAACCAC
PBU_60	CCATCTCATCCCTGCGTGTCTCCGACtcagTTCTAAGAGACgatCCTACGGGAGGCAGCAG	IonXpress_48	TTCTAAGAGAC
PBU_61	CCATCTCATCCCTGCGTGTCTCCGACtcagTCCTAACATAACgatCCTACGGGAGGCAGCAG	IonXpress_49	TCCTAACATAAC
PBU_62	CCATCTCATCCCTGCGTGTCTCCGACtcagCGGACAATGGCgatCCTACGGGAGGCAGCAG	IonXpress_50	CGGACAATGGC
PBU_63	CCATCTCATCCCTGCGTGTCTCCGACtcagTTGAGCCTATTCgatCCTACGGGAGGCAGCAG	IonXpress_51	TTGAGCCTATTC
PBU_64	CCATCTCATCCCTGCGTGTCTCCGACtcagCCGCATGGAACgatCCTACGGGAGGCAGCAG	IonXpress_52	CCGCATGGAAC
PBU_65	CCATCTCATCCCTGCGTGTCTCCGACtcagCTGGCAATCCTCgatCCTACGGGAGGCAGCAG	IonXpress_53	CTGGCAATCCTC
PBU_66	CCATCTCATCCCTGCGTGTCTCCGACtcagCCGGAGAATCGCgatCCTACGGGAGGCAGCAG	IonXpress_54	CCGGAGAATCGC
PBU_67	CCATCTCATCCCTGCGTGTCTCCGACtcagTCCACCTCCTCgatCCTACGGGAGGCAGCAG	IonXpress_55	TCCACCTCCTC
PBU_68	CCATCTCATCCCTGCGTGTCTCCGACtcagCAGCATTAATTCgatCCTACGGGAGGCAGCAG	IonXpress_56	CAGCATTAATTC
PBU_69	CCATCTCATCCCTGCGTGTCTCCGACtcagTCTGGCAACGGCgatCCTACGGGAGGCAGCAG	IonXpress_57	TCTGGCAACGGC
PBU_70	CCATCTCATCCCTGCGTGTCTCCGACtcagTCCTAGAACACgatCCTACGGGAGGCAGCAG	IonXpress_58	TCCTAGAACAC
PBU_71	CCATCTCATCCCTGCGTGTCTCCGACtcagTCCTTGATGTTCgatCCTACGGGAGGCAGCAG	IonXpress_59	TCCTTGATGTTC
PBU_72	CCATCTCATCCCTGCGTGTCTCCGACtcagTCTAGCTCTTCgatCCTACGGGAGGCAGCAG	IonXpress_60	TCTAGCTCTTC
PBU_73	CCATCTCATCCCTGCGTGTCTCCGACtcagTCACTCGGATCgatCCTACGGGAGGCAGCAG	IonXpress_61	TCACTCGGATC
PBU_74	CCATCTCATCCCTGCGTGTCTCCGACtcagTTCCTGCTTCACgatCCTACGGGAGGCAGCAG	IonXpress_62	TTCCTGCTTCAC
PBU_75	CCATCTCATCCCTGCGTGTCTCCGACtcagCCTTAGAGTTCgatCCTACGGGAGGCAGCAG	IonXpress_63	CCTTAGAGTTC
PBU_76	CCATCTCATCCCTGCGTGTCTCCGACtcagCTGAGTTCCGACgatCCTACGGGAGGCAGCAG	IonXpress_64	CTGAGTTCCGAC
PBU_77	CCATCTCATCCCTGCGTGTCTCCGACtcagTCCTGGCACATCgatCCTACGGGAGGCAGCAG	IonXpress_65	TCCTGGCACATC
PBU_78	CCATCTCATCCCTGCGTGTCTCCGACtcagCCGCAATCATCgatCCTACGGGAGGCAGCAG	IonXpress_66	CCGCAATCATC
PBU_79	CCATCTCATCCCTGCGTGTCTCCGACtcagTTCCTACCAGTCgatCCTACGGGAGGCAGCAG	IonXpress_67	TTCCTACCAGTC
PBU_80	CCATCTCATCCCTGCGTGTCTCCGACtcagTCAAGAAGTTCgatCCTACGGGAGGCAGCAG	IonXpress_68	TCAAGAAGTTC
PBU_81	CCATCTCATCCCTGCGTGTCTCCGACtcagTGAGGCTCCGACgatCCTACGGGAGGCAGCAG	IonXpress_71	TGAGGCTCCGAC
PBU_82	CCATCTCATCCCTGCGTGTCTCCGACtcagCGAAGGCCACACgatCCTACGGGAGGCAGCAG	IonXpress_72	CGAAGGCCACAC
PBU_83	CCATCTCATCCCTGCGTGTCTCCGACtcagCGGAAGAACCTCgatCCTACGGGAGGCAGCAG	IonXpress_76	CGGAAGAACCTC
PBU_84	CCATCTCATCCCTGCGTGTCTCCGACtcagCGAAGCGATTCgatCCTACGGGAGGCAGCAG	IonXpress_77	CGAAGCGATTC
PBU_85	CCATCTCATCCCTGCGTGTCTCCGACtcagCAGCCAATTCTCgatCCTACGGGAGGCAGCAG	IonXpress_78	CAGCCAATTCTC
PBU_86	CCATCTCATCCCTGCGTGTCTCCGACtcagTCGAAGGCAGGCgatCCTACGGGAGGCAGCAG	IonXpress_80	TCGAAGGCAGGC
PBU_87	CCATCTCATCCCTGCGTGTCTCCGACtcagCCTGCCATTCGCgatCCTACGGGAGGCAGCAG	IonXpress_81	CCTGCCATTCGC
PBU_88	CCATCTCATCCCTGCGTGTCTCCGACtcagCTAGGACATTCgatCCTACGGGAGGCAGCAG	IonXpress_83	CTAGGACATTC
PBU_89	CCATCTCATCCCTGCGTGTCTCCGACtcagCCAGCCTCAACgatCCTACGGGAGGCAGCAG	IonXpress_85	CCAGCCTCAAC
PBU_90	CCATCTCATCCCTGCGTGTCTCCGACtcagCTTGGTTATTCgatCCTACGGGAGGCAGCAG	IonXpress_86	CTTGGTTATTC
PBU_91	CCATCTCATCCCTGCGTGTCTCCGACtcagCCGAACACTTCgatCCTACGGGAGGCAGCAG	IonXpress_88	CCGAACACTTC
PBU_92	CCATCTCATCCCTGCGTGTCTCCGACtcagTCCTGAATCTCgatCCTACGGGAGGCAGCAG	IonXpress_89	TCCTGAATCTC
PBU_93	CCATCTCATCCCTGCGTGTCTCCGACtcagCTAACCACGGCgatCCTACGGGAGGCAGCAG	IonXpress_90	CTAACCACGGC
PBU_94	CCATCTCATCCCTGCGTGTCTCCGACtcagCGGAAGGATGCgatCCTACGGGAGGCAGCAG	IonXpress_91	CGGAAGGATGC
PBU_95	CCATCTCATCCCTGCGTGTCTCCGACtcagCTAGGAACCGCgatCCTACGGGAGGCAGCAG	IonXpress_92	CTAGGAACCGC
PBU_96	CCATCTCATCCCTGCGTGTCTCCGACtcagCTTGTCCAATCgatCCTACGGGAGGCAGCAG	IonXpress_93	CTTGTCCAATC

## Sheet: Table S2
Phylum	Class	Order	Family	Genus	Species	ASV	Blanch_0_1	Blanch_0_2	Blanch_0_3	Blanch_0_4	Blanch_24_1	Blanch_24_2	Blanch_24_3	Blanch_24_4	Blanch_48_1	Blanch_48_2	Blanch_48_3	Blanch_48_4	High-fiber_0_1	High-fiber_0_2	High-fiber_0_3	High-fiber_0_4	High-fiber_24_1	High-fiber_24_2	High-fiber_24_3	High-fiber_24_4	High-fiber_48_1	High-fiber_48_2	High-fiber_48_3	High-fiber_48_4	Untreated_0_1	Untreated_0_2	Untreated_0_3	Untreated_0_4	Untreated_24_1	Untreated_24_2	Untreated_24_3	Untreated_24_4	Untreated_48_1	Untreated_48_2	Untreated_48_3	Untreated_48_4	Ferment_0_1	Ferment_0_2	Ferment_0_3	Ferment_0_4	Ferment_24_1	Ferment_24_2	Ferment_24_3
Actinobacteria	Actinobacteria	Actinomycetales	Actinomycetaceae	Schaalia	Genus_Schaalia	ASV_0313	2.13833e-05	0.000112818	0.000371552	2.83716e-05	0	0	1.31067e-05	0	0	0	3.06063e-05	0	2.00874e-05	8.19221e-05	0.000213326	1.15992e-05	0	1.02977e-05	0	2.71905e-05	0	9.96999e-06	1.1457e-05	1.26113e-05	2.87958e-05	0.000232288	0.000195243	2.34824e-05	0	2.32161e-05	2.54926e-05	1.32961e-05	0	0	2.72105e-05	0	1.36333e-05	4.46183e-05	0.000258737	6.40601e-05	0	0	0
Actinobacteria	Actinobacteria	Actinomycetales	Actinomycetaceae	Schaalia	Genus_Schaalia	ASV_0339	5.34582e-05	4.83504e-05	0	2.83716e-05	0	0	0	2.28815e-05	0	0	0	0	6.02621e-05	0.000105328	0	0.000127591	0	0	0	4.07858e-05	1.25343e-05	0	0	1.26113e-05	4.79929e-05	0.000116144	0	0.000164377	2.37954e-05	0	0	2.65922e-05	0	0	0	4.70618e-05	5.45331e-05	5.94911e-05	0	0.000202857	0	0	0
Actinobacteria	Actinobacteria	Actinomycetales	Actinomycetaceae	Schaalia	Genus_Schaalia	ASV_0376	0	0	0.00023222	0	0	0	2.62134e-05	0	0	0	0	0	0	0	0.000213326	0	0	0	1.34765e-05	0	0	0	1.1457e-05	0	0	0	9.76213e-05	1.17412e-05	0	0	1.27463e-05	0	0	0	0	0	0	0	0.00018974	0	0	0	1.21051e-05
Actinobacteria	Actinobacteria	Actinomycetales	Actinomycetaceae	Schaalia	Genus_Schaalia	ASV_0431	0	0.000161168	0	0	0	1.17829e-05	0	0	0	0	0	0	0	5.85158e-05	0	0	0	1.02977e-05	0	0	0	1.994e-05	0	0	0	0.000232288	0	0	0	3.48242e-05	0	0	0	0	0	0	0	4.46183e-05	0	0	0	1.01763e-05	0
Actinobacteria	Actinobacteria	Actinomycetales	Actinomycetaceae	Schaalia	Genus_Schaalia	ASV_0432	1.06916e-05	0.000112818	7.74066e-05	0	0	0	0	0	0	0	0	0	0	2.34063e-05	3.55543e-05	0	0	0	0	0	0	0	0	0	0	5.16196e-05	4.88106e-05	0	0	1.16081e-05	1.27463e-05	0	0	0	0	0	5.45331e-05	1.48728e-05	6.89964e-05	0	0	0	0
Actinobacteria	Actinobacteria	Actinomycetales	Actinomycetaceae	Schaalia	Genus_Schaalia	ASV_0454	0	0	4.64439e-05	0	0	0	0	0	0	0	0	0	0	0	2.37029e-05	0	0	0	0	0	0	0	0	0	0	1.29049e-05	6.50809e-05	0	0	0	1.27463e-05	0	0	0	0	0	0	1.48728e-05	0.000103495	4.27068e-05	0	0	0
Actinobacteria	Actinobacteria	Actinomycetales	Actinomycetaceae	Schaalia	Genus_Schaalia	ASV_0457	0	0	7.74066e-05	0	0	0	0	0	0	0	0	0	0	0	4.74057e-05	0	0	0	0	0	0	0	0	0	0	2.58098e-05	8.13511e-05	1.17412e-05	0	0	0	0	0	0	0	0	0	0	5.17473e-05	0	0	0	0
Actinobacteria	Actinobacteria	Actinomycetales	Actinomycetaceae	Schaalia	Genus_Schaalia	ASV_0478	1.06916e-05	0	4.64439e-05	0	0	0	0	0	0	0	0	0	0	3.51095e-05	0	0	1.04941e-05	0	0	0	0	0	0	0	0	0	0.000113892	0	0	0	0	0	0	0	1.36053e-05	0	0	4.46183e-05	0	1.06767e-05	0	0	0
Actinobacteria	Actinobacteria	Actinomycetales	Actinomycetaceae	Schaalia	Genus_Schaalia	ASV_0485	0	0	1.54813e-05	0	0	0	0	0	0	0	0	0	0	0	8.296e-05	0	0	0	0	0	0	0	0	0	0	0	0	0	0	0	2.54926e-05	0	0	0	0	0	0	0	3.44982e-05	0	0	0	0
Actinobacteria	Actinobacteria	Actinomycetales	Actinomycetaceae	Schaalia	Genus_Schaalia	ASV_0487	0	0	4.64439e-05	0	0	0	1.31067e-05	1.14407e-05	0	0	1.53032e-05	0	0	0	2.37029e-05	0	0	0	0	0	0	0	0	0	0	0	8.13511e-05	0	0	0	0	1.32961e-05	0	0	0	0	0	0	1.72491e-05	0	0	0	0
Actinobacteria	Actinobacteria	Actinomycetales	Actinomycetaceae	Schaalia	Genus_Schaalia	ASV_0501	0	3.22336e-05	0	0	0	0	0	0	0	0	0	0	0	8.19221e-05	0	0	0	1.02977e-05	0	0	0	0	0	0	0	2.58098e-05	0	0	0	0	0	0	0	0	0	0	0	2.97455e-05	0	0	0	0	0
Actinobacteria	Actinobacteria	Actinomycetales	Actinomycetaceae	Schaalia	Genus_Schaalia	ASV_0511	0	1.61168e-05	0	0	0	0	0	0	0	0	0	0	0	1.17032e-05	0	0	0	1.02977e-05	0	0	0	0	0	0	0	0	1.62702e-05	0	0	0	0	0	0	0	0	0	0	1.48728e-05	3.44982e-05	0	0	0	0
Actinobacteria	Actinobacteria	Actinomycetales	Actinomycetaceae	Schaalia	Genus_Schaalia	ASV_0513	3.20749e-05	0	0	0	0	0	0	0	0	0	0	0	1.00437e-05	0	0	0	0	0	0	0	0	0	0	0	2.87958e-05	0	0	0	0	0	0	0	0	0	0	0	4.08998e-05	0	0	0	0	0	0
Actinobacteria	Actinobacteria	Actinomycetales	Actinomycetaceae	Varibaculum	Genus_Varibaculum	ASV_0403	0	8.05841e-05	0	0	0	2.35657e-05	0	0	0	4.34688e-05	0	0	1.00437e-05	0.000175547	0	0	0	0	0	0	0	0	0	0	9.59859e-06	0.000232288	0	0	0	0	0	0	0	0	0	0	0	0.000193346	0	0	0	0	0
Actinobacteria	Actinobacteria	Bifidobacteriales	Bifidobacteriaceae	Bifidobacterium	Genus_Bifidobacterium	ASV_0037	0	0	0.0274948	1.41858e-05	0	1.17829e-05	0.0033422	2.28815e-05	7.23589e-05	0	0.00185168	0	0	1.17032e-05	0.0308493	2.31984e-05	0	1.02977e-05	0.0184224	2.71905e-05	0	0	0.0238764	0	1.91972e-05	1.29049e-05	0.0271387	3.52237e-05	0	0	0.00252377	0	0	0	0.0007755	0	1.36333e-05	0	0.0217856	6.40601e-05	0	0	0.000956301
Actinobacteria	Actinobacteria	Bifidobacteriales	Bifidobacteriaceae	Bifidobacterium	Genus_Bifidobacterium	ASV_0135	2.13833e-05	9.67009e-05	0.00176487	9.93006e-05	0	1.17829e-05	3.932e-05	0.000183052	0	0	1.53032e-05	0	0.000130568	4.68126e-05	0.00325914	0.000208785	0	0	0.00250664	0.000176738	0	0	0.00177583	0.000252226	1.91972e-05	0	0.00209886	0.000129153	0	0	1.27463e-05	2.65922e-05	0	1.4281e-05	1.36053e-05	3.13745e-05	0	5.94911e-05	0.00175941	0.00022421	3.25087e-05	1.01763e-05	2.42101e-05
Actinobacteria	Actinobacteria	Bifidobacteriales	Bifidobacteriaceae	Bifidobacterium	Genus_Bifidobacterium	ASV_0183	0.00129369	0.00161168	0	1.41858e-05	0.000161057	2.35657e-05	0	0	0	0	0	0	0.000502185	0.00104158	0	0	0.000566679	0.000370717	0	0	0.000363495	0.0001994	0	0	0.000777486	0.000825913	0	0	9.51814e-05	2.32161e-05	0	0	3.04952e-05	0	0	0	0.000886162	0.00102622	1.72491e-05	0	6.50174e-05	2.03525e-05	0
Actinobacteria	Actinobacteria	Bifidobacteriales	Bifidobacteriaceae	Bifidobacterium	Genus_Bifidobacterium	ASV_0196	0	0	0.000959841	1.41858e-05	0	0	3.932e-05	0	0	0	0	0	2.00874e-05	0	0.00132736	0	0	0	0.00129375	1.35953e-05	0	0	0.000916559	0	0	0	0.000894862	0	0	0	2.54926e-05	0	0	2.8562e-05	0	0	0	0	0.00117294	1.06767e-05	1.62543e-05	0	2.42101e-05
Actinobacteria	Actinobacteria	Bifidobacteriales	Bifidobacteriaceae	Bifidobacterium	Genus_Bifidobacterium	ASV_0215	0	0	0.000650215	1.41858e-05	0	0	0.00011796	1.14407e-05	0	0	0	0	2.00874e-05	1.17032e-05	0.00158809	0	0	0	0.000579491	0	1.25343e-05	0	0.00037808	1.26113e-05	9.59859e-06	1.29049e-05	0.00073216	1.17412e-05	0	0	1.27463e-05	0	0	0	0	0	1.36333e-05	5.94911e-05	0.000931452	1.06767e-05	1.62543e-05	0	1.21051e-05
Actinobacteria	Actinobacteria	Bifidobacteriales	Bifidobacteriaceae	Bifidobacterium	Genus_Bifidobacterium	ASV_0245	0	0	0.000278664	0.000184415	0	0	3.932e-05	4.57629e-05	0	0	1.53032e-05	2.2416e-05	0	2.34063e-05	0.000343691	0.000614756	0	1.02977e-05	0.000215625	0.000380668	0	0	0.000263511	0.000365728	0	2.58098e-05	0.000130162	0.000293531	0	0	5.09853e-05	0.000106369	0	0	0	0.000125498	0	0	0.000155242	0.000309624	1.62543e-05	0	0
Actinobacteria	Actinobacteria	Bifidobacteriales	Bifidobacteriaceae	Bifidobacterium	Genus_Bifidobacterium	ASV_0285	0	1.61168e-05	3.09626e-05	0.000141858	0	0	5.24267e-05	4.57629e-05	0	0	1.53032e-05	2.2416e-05	3.01311e-05	0	0.000118514	0.000115992	0	0	0.00074121	0	0	0	0.000217683	0	0	1.29049e-05	0	1.17412e-05	0	0	0	2.65922e-05	0	0	0	0	0	1.48728e-05	8.62456e-05	8.54135e-05	0	0	0
Actinobacteria	Actinobacteria	Bifidobacteriales	Bifidobacteriaceae	Bifidobacterium	Genus_Bifidobacterium	ASV_0298	5.34582e-05	9.67009e-05	0.000108369	0	0	0	1.31067e-05	0	0	0	0	2.2416e-05	6.02621e-05	7.0219e-05	0.000402949	0	2.09881e-05	3.08931e-05	0.000121289	1.35953e-05	6.26716e-05	3.988e-05	6.87419e-05	0	2.87958e-05	1.29049e-05	0.000227783	0	0	0	1.27463e-05	0	0	0	0	0	4.08998e-05	0.000133855	0.000172491	0	1.62543e-05	0	0
Actinobacteria	Actinobacteria	Bifidobacteriales	Bifidobacteriaceae	Bifidobacterium	Genus_Bifidobacterium	ASV_0335	0	0	0.000650215	0	0	0	3.932e-05	0	0	0	0	0	0	0	0.000225177	0	0	0	2.69531e-05	0	0	0	4.58279e-05	0	0	0	0.000244053	0	0	0	3.8239e-05	0	0	0	0	0	0	0	0.000275986	0	0	0	0
Actinobacteria	Actinobacteria	Bifidobacteriales	Bifidobacteriaceae	Bifidobacterium	Genus_Bifidobacterium	ASV_0341	0	0	0.000108369	0	0	0	0	2.28815e-05	0	0	0	0	0	0	0.00033184	0	0	0	0.000229101	0	0	0	0.000126027	1.26113e-05	0	0	0.000130162	2.34824e-05	0	0	0	0	0	0	1.36053e-05	0	0	0	0.000275986	1.06767e-05	1.62543e-05	0	0
Actinobacteria	Actinobacteria	Bifidobacteriales	Bifidobacteriaceae	Bifidobacterium	Genus_Bifidobacterium	ASV_0359	0	0	3.09626e-05	5.67432e-05	0	0	1.31067e-05	2.28815e-05	0	0	0	0	2.00874e-05	0	4.74057e-05	8.11943e-05	1.04941e-05	0	0.000202148	1.35953e-05	0	0	5.72849e-05	3.78339e-05	0	0	0	3.52237e-05	0	0	2.54926e-05	0	0	0	0	0	0	0	3.44982e-05	6.40601e-05	0	1.01763e-05	0
Actinobacteria	Actinobacteria	Bifidobacteriales	Bifidobacteriaceae	Bifidobacterium	Genus_Bifidobacterium	ASV_0365	3.20749e-05	3.22336e-05	0	1.41858e-05	0	1.17829e-05	0	0	1.80897e-05	0	0	0	0.000110481	0.000140438	0	0	8.39525e-05	4.11908e-05	0	0	0	2.991e-05	1.1457e-05	0	6.71901e-05	0.000116144	0	0	4.75907e-05	0	0	0	0	0	0	0	6.81663e-05	0.000178473	0	0	0	0	0
Actinobacteria	Actinobacteria	Bifidobacteriales	Bifidobacteriaceae	Bifidobacterium	Genus_Bifidobacterium	ASV_0369	0	0	0.000139332	1.41858e-05	0	0	0	1.14407e-05	0	0	0	0	0	0	0.000154069	0	0	0	0.000134765	0	0	0	0.000137484	0	0	0	0.000113892	0	0	0	1.27463e-05	0	0	0	0	0	0	0	0.000172491	0	0	0	0
Actinobacteria	Actinobacteria	Bifidobacteriales	Bifidobacteriaceae	Bifidobacterium	Genus_Bifidobacterium	ASV_0388	1.06916e-05	0	4.64439e-05	1.41858e-05	0	0	0	5.72037e-05	0	0	0	2.2416e-05	0	0	4.74057e-05	8.11943e-05	0	1.02977e-05	2.69531e-05	0.000135953	0	0	1.1457e-05	3.78339e-05	0	1.29049e-05	0.000113892	4.69649e-05	0	0	0	0	0	0	0	0	0	1.48728e-05	1.72491e-05	6.40601e-05	1.62543e-05	0	0
Actinobacteria	Actinobacteria	Bifidobacteriales	Bifidobacteriaceae	Bifidobacterium	Genus_Bifidobacterium	ASV_0436	0	0	3.09626e-05	1.41858e-05	0	0	1.31067e-05	4.57629e-05	0	0	0	0	1.00437e-05	0	1.18514e-05	5.79959e-05	0	0	2.69531e-05	4.07858e-05	0	0	2.2914e-05	2.52226e-05	0	0	3.25404e-05	5.87061e-05	0	0	0	1.32961e-05	0	0	0	1.56873e-05	0	0	0	4.27068e-05	0	0	0
Actinobacteria	Actinobacteria	Bifidobacteriales	Bifidobacteriaceae	Bifidobacterium	Genus_Bifidobacterium	ASV_0453	2.13833e-05	3.22336e-05	6.19253e-05	0	0	0	0	0	0	0	0	0	0	1.17032e-05	1.18514e-05	0	1.04941e-05	1.02977e-05	4.04296e-05	0	1.25343e-05	1.994e-05	4.58279e-05	0	2.87958e-05	2.58098e-05	0	0	0	0	0	0	0	0	0	0	1.36333e-05	2.97455e-05	1.72491e-05	1.06767e-05	0	0	0
Actinobacteria	Actinobacteria	Bifidobacteriales	Bifidobacteriaceae	Bifidobacterium	Genus_Bifidobacterium	ASV_0460	0	0	0.000123851	0	0	0	0	0	0	0	0	0	0	0	3.55543e-05	0	0	0	2.69531e-05	0	0	0	5.72849e-05	0	0	0	8.13511e-05	0	0	0	1.27463e-05	0	0	0	0	0	0	0	3.44982e-05	0	0	0	0
Actinobacteria	Actinobacteria	Bifidobacteriales	Bifidobacteriaceae	Bifidobacterium	adolescentis/angulatum/catenulatum/kashiwanohense/pseudocatenulatum/thermacidophilum	ASV_0003	0.497332	0.461537	0.00253894	0.00261019	0.0609196	0.0144811	0.000996107	0.000286018	0.0109443	0.0165181	6.12126e-05	6.7248e-05	0.425642	0.499222	0.00533314	0.00013919	0.265836	0.146505	0.00184629	0.000679763	0.192991	0.118792	0.00108841	7.56678e-05	0.460415	0.424132	0.0024568	0.000493131	0.0241761	0.0137904	0.000395136	5.31844e-05	0.0112375	0.0125959	4.08158e-05	1.56873e-05	0.382958	0.439832	0.0101597	0.000138797	0.0237476	0.0132698	8.47355e-05
Actinobacteria	Actinobacteria	Bifidobacteriales	Bifidobacteriaceae	Bifidobacterium	adolescentis/faecale/ruminantium	ASV_0001	0.00522821	0.0276565	0.322538	0.609862	0.00312047	0.00238014	0.0449428	0.346219	0.00195369	0.00317322	0.0174303	0.0896416	0.0173756	0.0269524	0.285406	0.742858	0.0024766	0.00972104	0.245111	0.729373	0.00221857	0.00877359	0.264817	0.655308	0.0047705	0.0167635	0.347467	0.515933	0.00133254	0.00105633	0.0397303	0.121859	0.000762381	0.00108536	0.00884342	0.160465	0.00467621	0.0243913	0.234019	0.649943	0.00835473	0.00150609	0.00829197
Actinobacteria	Actinobacteria	Bifidobacteriales	Bifidobacteriaceae	Bifidobacterium	angulatum	ASV_0009	8.55331e-05	0.000338453	0.218225	0.00026953	2.01321e-05	5.89143e-05	0.0276158	0.000503392	0.000524602	4.34688e-05	0.0111713	0	0.000210917	0.000175547	0.269845	0.000440769	2.09881e-05	6.17862e-05	0.061736	0.000638978	8.77402e-05	1.994e-05	0.0636092	0.000479229	0.000115183	0.000141954	0.196853	0.000504873	2.37954e-05	0	0.0269967	0.000186145	0	1.4281e-05	0.00708834	0.000141185	6.81663e-05	0.0001636	0.20385	0.000565864	9.75261e-05	4.0705e-05	0.00491466
Actinobacteria	Actinobacteria	Bifidobacteriales	Bifidobacteriaceae	Bifidobacterium	bifidum	ASV_0045	1.06916e-05	3.22336e-05	0.0312723	0	0	0	0.00243784	0	5.42692e-05	0	0.00108652	0	0	1.17032e-05	0.0271872	1.15992e-05	0	0	0.00336914	0	0	0	0.0073783	0	0	2.58098e-05	0.0278709	0	0	0	0.00256201	0	0	0	0.000585026	0	1.36333e-05	0	0.0229241	0	1.62543e-05	0	0.000351047
Actinobacteria	Actinobacteria	Bifidobacteriales	Bifidobacteriaceae	Bifidobacterium	dentium	ASV_0330	3.20749e-05	4.83504e-05	0	4.25574e-05	0	0	1.31067e-05	1.14407e-05	0	0	0	0	5.02185e-05	3.51095e-05	0	9.27934e-05	6.29644e-05	0	0.000121289	5.43811e-05	2.50686e-05	0	0.00060722	1.26113e-05	2.87958e-05	1.29049e-05	1.62702e-05	0.000129153	0	0	0	1.32961e-05	0	0	0	0	0	1.48728e-05	3.44982e-05	0.000117444	0	0	0
Actinobacteria	Actinobacteria	Bifidobacteriales	Bifidobacteriaceae	Bifidobacterium	longum	ASV_0007	0.0265367	0.11098	0.0954113	0.00373087	0.00215413	0.00435966	0.0224648	0.00141865	0.00119392	0.00243425	0.00749855	0.000493152	0.0291066	0.138331	0.095404	0.00267941	0.0228036	0.10549	0.107219	0.00523418	0.0651534	0.086699	0.165565	0.00230787	0.0252539	0.0912247	0.0823924	0.00413291	0.00140393	0.00263503	0.0209167	0.000664805	0.000350695	0.00181369	0.00442171	0.00051768	0.0276074	0.110713	0.0743954	0.00314962	0.00177172	0.00334799	0.0028568
Actinobacteria	Actinobacteria	Bifidobacteriales	Bifidobacteriaceae	Bifidobacterium	longum	ASV_0072	0.00265153	0.00557642	0.00181131	0	0.000241585	0.000176743	0.000969894	0	3.61795e-05	0.00034775	0.000229547	0	0.00416813	0.00578136	0.00189623	0	0.0019519	0.00373807	0.00283007	0	0.00147905	0.00296109	0.00398703	0	0.00239965	0.00610401	0.00183853	0	7.13861e-05	0.000278594	0.000854004	1.32961e-05	7.62381e-05	0.000214215	9.52368e-05	0	0.00304022	0.00566652	0.00153517	0	0.000146289	0.000122115	3.63152e-05
Actinobacteria	Actinobacteria	Bifidobacteriales	Bifidobacteriaceae	Bifidobacterium	pseudolongum	ASV_0118	0.00230939	0	0	0	0.00261717	0	0	0	0.000271346	0	0	0	0.00360568	2.34063e-05	1.18514e-05	0	0.00375687	0.00116364	0	0	0.00224364	0.000987029	0	0	0.00227487	0	0	0	0.000499703	0	0	0	0.000182971	0	0	0	0.00336742	1.48728e-05	0	0	0.000975261	0	0
Actinobacteria	Actinobacteria	Class_Actinobacteria	Class_Actinobacteria	Class_Actinobacteria	Class_Actinobacteria	ASV_0169	2.13833e-05	0.000225635	0.00035607	0.00043976	0	1.17829e-05	0.00015728	0.00016017	0	0	1.53032e-05	0	0.000482097	0.000292579	0.000900709	0.000440769	0.000209881	0.000411908	0.000121289	0.00118279	0.000162946	0.00035892	1.1457e-05	0.00010089	4.79929e-05	0.000206478	0.000260323	3.52237e-05	0	0	5.09853e-05	2.65922e-05	0	1.4281e-05	0	1.56873e-05	8.17996e-05	0.000520547	0.000569221	0.000629925	1.62543e-05	0	1.21051e-05
Actinobacteria	Actinobacteria	Class_Actinobacteria	Class_Actinobacteria	Class_Actinobacteria	Class_Actinobacteria	ASV_0381	2.13833e-05	0	0	1.41858e-05	8.05283e-05	0	0	1.14407e-05	0	0	0	0	4.01748e-05	0	1.18514e-05	0	0.000377786	0	0	2.71905e-05	0.000238152	0	0	0	1.91972e-05	0	0	1.17412e-05	2.37954e-05	0	0	0	0	0	0	0	0	1.48728e-05	0	2.13534e-05	0	0	0
Actinobacteria	Actinobacteria	Micrococcales	Micrococcaceae	Rothia	mucilaginosa	ASV_0439	4.27666e-05	0	4.64439e-05	0	0	0	0	0	0	0	0	0	2.00874e-05	0	3.55543e-05	1.15992e-05	0	0	1.34765e-05	0	0	0	0	1.26113e-05	3.83943e-05	0	1.62702e-05	1.17412e-05	0	0	0	0	0	0	0	0	4.08998e-05	0	0	2.13534e-05	0	0	0
Actinobacteria	Coriobacteriia	Class_Coriobacteriia	Class_Coriobacteriia	Class_Coriobacteriia	Class_Coriobacteriia	ASV_0223	0	0	0.00023222	0.000539061	0	0	1.31067e-05	0.000274578	0	0	1.53032e-05	0.000201744	1.00437e-05	0	5.92572e-05	0.000243583	0	0	0	0.000720549	0	0	2.2914e-05	0.000769289	0	0	0.000292864	0.00208994	0	0	1.27463e-05	0.000199442	0	0	0	7.84363e-05	0	0	0.000103495	0.000587218	1.62543e-05	0	2.42101e-05
Actinobacteria	Coriobacteriia	Class_Coriobacteriia	Class_Coriobacteriia	Class_Coriobacteriia	Class_Coriobacteriia	ASV_0258	0	0.000805841	0	0	0	2.35657e-05	0	0	0	0	0	0	0	0.000725596	0	0	0	0.000113275	0	0	0	2.991e-05	0	0	0	0.000800103	0	0	0	2.32161e-05	0	0	0	2.8562e-05	0	0	0	0.000981602	0	0	0	3.05288e-05	0
Actinobacteria	Coriobacteriia	Class_Coriobacteriia	Class_Coriobacteriia	Class_Coriobacteriia	Class_Coriobacteriia	ASV_0355	0	0	1.54813e-05	5.67432e-05	0	0	1.31067e-05	2.28815e-05	0	0	0	0	6.02621e-05	1.17032e-05	8.296e-05	4.63967e-05	2.09881e-05	3.08931e-05	1.34765e-05	0.000176738	1.25343e-05	4.985e-05	1.1457e-05	1.26113e-05	1.91972e-05	1.29049e-05	0	0	0	0	0	0	0	0	0	0	0	4.46183e-05	0.000120744	0.000117444	0	0	0
Actinobacteria	Coriobacteriia	Coriobacteriales	Atopobiaceae	Lancefieldella	Genus_Lancefieldella	ASV_0422	0	3.22336e-05	4.64439e-05	2.83716e-05	0	0	2.62134e-05	0	0	0	0	0	0	1.17032e-05	5.92572e-05	1.15992e-05	0	1.02977e-05	0	1.35953e-05	0	0	0	1.26113e-05	0	2.58098e-05	0.000130162	3.52237e-05	2.37954e-05	0	1.27463e-05	0	0	0	2.72105e-05	0	2.72665e-05	0	8.62456e-05	3.20301e-05	0	0	0
Actinobacteria	Coriobacteriia	Coriobacteriales	Coriobacteriaceae	Collinsella	Genus_Collinsella	ASV_0079	0	0.016149	0	0	0	0.000612709	0	0	0	0.000608563	0	0	2.00874e-05	0.00730277	3.55543e-05	0	0	0.00119453	0	0	0	0.00513455	0	0	0	0.0148922	0	0	0	0.000893821	0	0	0	0.000357026	0	0	0	0.0148876	0.000155242	1.06767e-05	0	0.00089551	0
Actinobacteria	Coriobacteriia	Coriobacteriales	Coriobacteriaceae	Collinsella	Genus_Collinsella	ASV_0171	5.34582e-05	0.000257869	0.00035607	0.000468132	0	0	5.24267e-05	0.00016017	0	0	1.53032e-05	0	0.00065284	0.000327689	0.000948114	0.000475566	0.000230869	0.000504588	9.43358e-05	0.00106043	0.000200549	0.00031904	4.58279e-05	7.56678e-05	4.79929e-05	0.000116144	0.000227783	4.69649e-05	0	0	5.09853e-05	0	0	4.28431e-05	0	1.56873e-05	0	0.000475928	0.000638217	0.000427068	0	0	1.21051e-05
Actinobacteria	Coriobacteriia	Coriobacteriales	Coriobacteriaceae	Collinsella	Genus_Collinsella	ASV_0254	0	0.000193402	0.000185776	9.93006e-05	0	0	6.55334e-05	8.00851e-05	0	0	0	0	0.000100437	8.19221e-05	0.000391097	0.000115992	0.000125929	0.000236847	2.69531e-05	0.00048943	7.52059e-05	9.96999e-05	0	5.04452e-05	3.83943e-05	6.45245e-05	6.50809e-05	2.34824e-05	0	0	0	1.32961e-05	0	0	0	0	2.72665e-05	0.000133855	0.00018974	0.00016015	0	1.01763e-05	0
Actinobacteria	Coriobacteriia	Coriobacteriales	Coriobacteriaceae	Collinsella	Genus_Collinsella	ASV_0382	0	0	0	0	0.000120792	0	0	0	0	0	0	0	3.01311e-05	0	0	0	0.000272846	0	0	0	0.000426167	0	0	0	3.83943e-05	0	0	0	0	0	0	0	0	0	0	0	1.36333e-05	0	0	0	0	0	0
Actinobacteria	Coriobacteriia	Coriobacteriales	Coriobacteriaceae	Senegalimassilia	Genus_Senegalimassilia	ASV_0140	0	0.00449659	6.19253e-05	0	2.01321e-05	8.24801e-05	0	2.28815e-05	0	0.000130406	0	0	0	0.00249277	1.18514e-05	2.31984e-05	0	0.000205954	0	0	0	0.00018943	0	0	0	0.00378113	1.62702e-05	1.17412e-05	0	0.000116081	0	0	0	2.8562e-05	0	0	0	0.00358434	5.17473e-05	4.27068e-05	0	0.000122115	0
Actinobacteria	Coriobacteriia	Coriobacteriales	Coriobacteriaceae	Senegalimassilia	Genus_Senegalimassilia	ASV_0242	0	0.000177285	0.000959841	0	0	0	0	0	0	0	0	0	0	0.000187251	0.000805897	0	0	0	2.69531e-05	0	0	0	1.1457e-05	0	0	0.000206478	0.00118773	0	0	0	2.54926e-05	0	0	0	0	0	0	0.000178473	0.000724463	0	0	1.01763e-05	0
Actinobacteria	Coriobacteriia	Coriobacteriales	Coriobacteriaceae	Senegalimassilia	Genus_Senegalimassilia	ASV_0267	0	0.000741373	0	0	0	1.17829e-05	0	0	0	4.34688e-05	0	0	0	0.000620268	0	0	0	4.11908e-05	0	0	0	3.988e-05	0	0	0	0.00060653	0	0	0	0	0	0	0	0.000314182	0	0	0	0.000669274	0	0	0	1.01763e-05	0
Actinobacteria	Coriobacteriia	Coriobacteriales	Coriobacteriaceae	Senegalimassilia	anaerobia	ASV_0092	0	0.00454494	0.00123851	0.00120579	4.02641e-05	5.89143e-05	1.31067e-05	0.000480511	0	0.000173875	0	4.4832e-05	3.01311e-05	0.00434187	0.00091256	0.00132231	0	0.000278038	1.34765e-05	0.000285501	0	0.00013958	1.1457e-05	0.000201781	0	0.00472319	0.00074843	0.00157332	4.75907e-05	0.000104473	0	0.000917431	0	0.00262771	0	1.56873e-05	0	0.00342074	0.000862456	0.00125985	0	8.141e-05	2.42101e-05
Actinobacteria	Coriobacteriia	Eggerthellales	Eggerthellaceae	Adlercreutzia	Genus_Adlercreutzia	ASV_0162	0	0	0.00249249	0	0	0	0.000183493	0	1.80897e-05	0	0.000229547	0	0	0	0.00250065	0	0	0	0.000121289	0	0	0	0.000148941	0	0	0	0.00242426	0	0	0	0.000229434	0	0	0	4.08158e-05	0	0	0	0.00210439	0	0	0	0.000108946
Actinobacteria	Coriobacteriia	Eggerthellales	Eggerthellaceae	Adlercreutzia	Genus_Adlercreutzia	ASV_0305	0.000598732	0	0	0	0.000241585	0	0	1.14407e-05	0	0	0	0	0.000180786	0	0	0	0	0	0	0	0.000162946	0	0	0	0.000758288	0	0	0	7.13861e-05	0	0	0	0	0	0	0	0.000231766	1.48728e-05	1.72491e-05	1.06767e-05	1.62543e-05	0	0
Actinobacteria	Coriobacteriia	Eggerthellales	Eggerthellaceae	Adlercreutzia	Genus_Adlercreutzia	ASV_0420	0	0	0.000185776	0	0	0	1.31067e-05	0	0	0	0	2.2416e-05	0	0	8.296e-05	0	0	0	0	2.71905e-05	0	0	0	3.78339e-05	0	0	0.000113892	0.000105671	0	0	0	0	0	0	0	1.56873e-05	0	0	1.72491e-05	2.13534e-05	1.62543e-05	0	3.63152e-05
Actinobacteria	Coriobacteriia	Eggerthellales	Eggerthellaceae	Eggerthella	lenta	ASV_0137	0.00113331	1.61168e-05	0	1.41858e-05	0.000885811	3.53486e-05	3.932e-05	2.28815e-05	0.00153763	0.000869376	6.12126e-05	0	0.0011952	2.34063e-05	4.74057e-05	1.15992e-05	0.000220375	0	0	1.35953e-05	0.00105288	0.00020937	0	0	0.000863873	2.58098e-05	0	0	0.000214158	0.000185729	6.37316e-05	0	0.000808124	0.00277052	0.000176868	3.13745e-05	0.000831629	1.48728e-05	1.72491e-05	1.06767e-05	0.000585157	6.10575e-05	6.05254e-05
Actinobacteria	Coriobacteriia	Eggerthellales	Eggerthellaceae	Enteroscipio	Genus_Enteroscipio	ASV_0167	0.00348548	0	0	2.83716e-05	0.000140924	0	0	0	9.04486e-05	0	0	0	0.00172751	0	0	0	0.000199387	0	0	0	0.00072699	0	0	0	0.00293717	0	0	0	9.51814e-05	0	0	0	4.57429e-05	0	0	0	0.00134969	0	1.72491e-05	0	0.000130035	0	0
Actinobacteria	Coriobacteriia	Eggerthellales	Eggerthellaceae	Family_Eggerthellaceae	Family_Eggerthellaceae	ASV_0219	0	0	0.00229123	0	0	0	0.00015728	0	0	0	7.65158e-05	0	0	0	0.00066368	0	0	0	6.73827e-05	0	0	0	0.000126027	0	0	0	0.0028961	0	0	0	0.000101971	0	0	0	9.52368e-05	0	0	0	0.000689964	0	0	0	0.000108946
Actinobacteria	Coriobacteriia	Eggerthellales	Eggerthellaceae	Family_Eggerthellaceae	Family_Eggerthellaceae	ASV_0225	0	0.00183732	0	0	0	2.35657e-05	0	0	0	4.34688e-05	0	0	0	0.00104158	0	0	0	0.000164763	0	0	0	6.97899e-05	0	0	0	0.00135501	0	0	0	6.96484e-05	0	0	0	1.4281e-05	0	0	0	0.00132368	0	0	0	3.05288e-05	0
Actinobacteria	Coriobacteriia	Eggerthellales	Eggerthellaceae	Family_Eggerthellaceae	Family_Eggerthellaceae	ASV_0302	0	0.000644673	0	0	0	2.35657e-05	0	0	0	0	0	0	0	0.000397907	0	0	0	2.05954e-05	0	0	0	1.994e-05	0	0	0	0.00060653	0	0	0	2.32161e-05	0	0	0	2.8562e-05	0	0	0	0.00043131	1.72491e-05	0	0	1.01763e-05	0
Actinobacteria	Coriobacteriia	Eggerthellales	Eggerthellaceae	Family_Eggerthellaceae	Family_Eggerthellaceae	ASV_0332	0	0.000451271	0	0	0	1.17829e-05	0	0	0	0	0	0	0	0.00025747	0	0	0	1.02977e-05	0	0	0	1.994e-05	0	0	0	0.00058072	0	0	0	5.80403e-05	0	0	0	0	0	0	0	0.000386692	0	0	0	0	0
Actinobacteria	Coriobacteriia	Eggerthellales	Eggerthellaceae	Family_Eggerthellaceae	Family_Eggerthellaceae	ASV_0333	0	0.000515738	0	0	0	3.53486e-05	0	0	0	0	0	0	0	0.000304282	0	0	0	1.02977e-05	0	0	0	0	0	0	0	0.000464576	0	0	0	5.80403e-05	0	0	0	0	0	0	0	0.00043131	1.72491e-05	0	0	1.01763e-05	0
Actinobacteria	Coriobacteriia	Eggerthellales	Eggerthellaceae	Family_Eggerthellaceae	Family_Eggerthellaceae	ASV_0342	0	0	0	0.000141858	0	0	0	6.86444e-05	0	0	0	4.4832e-05	0	0	0	0.000104393	0	0	0	0.000149548	0	0	0	2.52226e-05	0	0	0	0.000610544	0	0	0	3.98883e-05	0	0	0	3.13745e-05	0	0	0	0.000149474	0	0	0
Actinobacteria	Coriobacteriia	Eggerthellales	Eggerthellaceae	Slackia	isoflavoniconvertens	ASV_0026	0.000502507	0.00821958	0.0108679	0.00112068	0.00010066	0.00127255	0.0231857	0.00115551	9.04486e-05	0.0716801	0.00313715	0.00130013	0.000472053	0.00516109	0.00706345	0.000475566	9.44465e-05	0.0250131	0.00188672	0.00100605	0.000112809	0.017288	0.00399849	0.000554897	0.000451134	0.00822042	0.00790732	0.00163203	9.51814e-05	0.00133493	0.0172075	0.00228693	7.62381e-05	0.032932	0.00365981	0.00156873	0.000231766	0.00749587	0.00852106	0.000875488	0.000130035	0.00154679	0.00522939
Bacteroidetes	Bacteroidia	Bacteroidales	Bacteroidaceae	Bacteroides	Genus_Bacteroides	ASV_0011	3.20749e-05	3.22336e-05	1.54813e-05	1.41858e-05	0.0259905	0.00465423	0.00848002	0.0173785	0.0676375	0.0430341	0.0243932	0.119813	0.00065284	9.36253e-05	3.55543e-05	1.15992e-05	0.000188893	1.02977e-05	0.000107812	5.43811e-05	0.00017548	1.994e-05	1.1457e-05	0.000189169	2.87958e-05	5.16196e-05	0.000992483	8.21886e-05	0.0658894	0.00536293	0.00629668	0.0421487	0.0872926	0.0467418	0.0217956	0.116007	0	0.000118982	0	2.13534e-05	0.0233087	0.0126389	0.0372352
Bacteroidetes	Bacteroidia	Bacteroidales	Bacteroidaceae	Bacteroides	Genus_Bacteroides	ASV_0090	0	0	0	0	0.000221453	0.000188526	6.55334e-05	0.000961021	0.00146527	0.00495544	0.000229547	0.00636614	5.02185e-05	0	1.18514e-05	3.47975e-05	1.04941e-05	0	0	5.43811e-05	0	0	0	1.26113e-05	0	0	6.50809e-05	5.87061e-05	0.00035693	0.000150905	0.000101971	0.00202101	0.00228714	0.00492695	0.00028571	0.00607097	1.36333e-05	0	0	1.06767e-05	4.8763e-05	0.000122115	9.68406e-05
Bacteroidetes	Bacteroidia	Bacteroidales	Bacteroidaceae	Bacteroides	Genus_Bacteroides	ASV_0108	0	0	0	0	0	0	0	0.00217374	0	4.34688e-05	0	0.0156912	1.00437e-05	0	0	0	0	0	0	0	0	0	0	0	0	1.29049e-05	4.88106e-05	0	0	0	0	0.00494615	0	0	0	0.0119066	0	1.48728e-05	0	0	0	0	0
Bacteroidetes	Bacteroidia	Bacteroidales	Bacteroidaceae	Bacteroides	Genus_Bacteroides	ASV_0187	0	0	0	0	0.000744886	0	0	0	7.23589e-05	0	0	0	0	0	0	0	1.04941e-05	0	0	0	5.01373e-05	0	0	0	9.59859e-06	0	0	0	0.000142772	0	0	0	3.04952e-05	0	0	0	0	0	0	0	0.000178798	0	0
Bacteroidetes	Bacteroidia	Bacteroidales	Bacteroidaceae	Bacteroides	Genus_Bacteroides	ASV_0192	0	0	0	0	2.01321e-05	2.35657e-05	1.31067e-05	0.000274578	0.000940666	4.34688e-05	4.59095e-05	0.000201744	0	0	0	0	0	0	0	0	1.25343e-05	0	0	0	0	0	0	0	0	9.28645e-05	1.27463e-05	0.000465364	0.000930105	0.000528398	0.000122447	0.000752988	0	0	0	0	0.000162543	4.0705e-05	0.000290522
Bacteroidetes	Bacteroidia	Bacteroidales	Bacteroidaceae	Bacteroides	Genus_Bacteroides	ASV_0275	0	0	0	0	2.01321e-05	3.53486e-05	3.932e-05	3.43222e-05	0.000162808	4.34688e-05	6.12126e-05	0.000156912	0	0	0	0	0	0	0	0	0	0	0	0	0	0	0	0	0.000166568	2.32161e-05	1.27463e-05	0.000186145	0.000274457	0.00014281	4.08158e-05	0.000298058	0	0	0	0	1.62543e-05	4.0705e-05	0.000121051
Bacteroidetes	Bacteroidia	Bacteroidales	Bacteroidaceae	Bacteroides	Genus_Bacteroides	ASV_0284	0	0	0	0	0.000140924	0	2.62134e-05	3.43222e-05	7.23589e-05	0	1.53032e-05	0.000313824	0	0	0	0	0	0	0	0	0	0	0	0	0	0	0	0	0	0	1.27463e-05	6.64805e-05	0.000182971	1.4281e-05	4.08158e-05	7.84363e-05	0	0	0	0	0.000130035	2.03525e-05	0.000145261
Bacteroidetes	Bacteroidia	Bacteroidales	Bacteroidaceae	Bacteroides	Genus_Bacteroides	ASV_0334	0	0	0	0	0	0	0	1.14407e-05	1.80897e-05	0	6.12126e-05	0.000806976	0	0	0	0	0	0	0	0	0	0	0	0	0	0	0	0	0	0	0	9.30727e-05	4.57429e-05	2.8562e-05	5.4421e-05	0.000282371	0	0	0	0	0	1.01763e-05	3.63152e-05
Bacteroidetes	Bacteroidia	Bacteroidales	Bacteroidaceae	Bacteroides	Genus_Bacteroides	ASV_0338	0	0	0	0	0	0	0	0.000205933	0	0	0	0.000134496	0	0	0	0	0	0	0	1.35953e-05	0	0	0	0	0	0	0	0	0	0	0	0.000531844	0	0	0	9.41236e-05	0	0	0	0	0	0	0
Bacteroidetes	Bacteroidia	Bacteroidales	Bacteroidaceae	Bacteroides	Genus_Bacteroides	ASV_0346	0	0	0	1.41858e-05	0	0	5.24267e-05	0	0	0	0.000214244	0	0	0	0	1.15992e-05	0	0	0	0	0	0	0	0	9.59859e-06	0	0	0	0	0	5.09853e-05	0	0	0	0.000176868	0	0	0	0	0	0	0	0.000169471
Bacteroidetes	Bacteroidia	Bacteroidales	Bacteroidaceae	Bacteroides	Genus_Bacteroides	ASV_0366	0	0	0	0	2.01321e-05	0	0	1.14407e-05	1.80897e-05	4.34688e-05	7.65158e-05	0.000156912	2.00874e-05	0	0	0	0	0	0	0	0	0	0	0	0	0	0	0	2.37954e-05	0	1.27463e-05	6.64805e-05	4.57429e-05	1.4281e-05	5.4421e-05	0.000407869	0	0	0	0	3.25087e-05	0	2.42101e-05
Bacteroidetes	Bacteroidia	Bacteroidales	Bacteroidaceae	Bacteroides	Genus_Bacteroides	ASV_0373	0	0	0	0	0	0	0	3.43222e-05	0	0	0	0.000537984	1.00437e-05	0	0	0	0	0	0	0	0	0	0	0	0	0	0	0	0	0	0	9.30727e-05	0	0	0	0.000360807	0	0	0	0	0	0	0
Bacteroidetes	Bacteroidia	Bacteroidales	Bacteroidaceae	Bacteroides	Genus_Bacteroides	ASV_0423	0	0	0	0	0	0	1.31067e-05	1.14407e-05	0	0	1.53032e-05	0.000201744	0	0	0	0	0	0	0	0	0	0	0	0	0	0	1.62702e-05	0	0	0	0	0	0	0	5.4421e-05	0.000250996	0	0	0	0	0	0	1.21051e-05
Bacteroidetes	Bacteroidia	Bacteroidales	Bacteroidaceae	Bacteroides	Genus_Bacteroides	ASV_0468	0	0	0	0	0	0	0	3.43222e-05	0	0	0	2.2416e-05	1.00437e-05	0	0	0	0	0	0	0	0	0	0	0	0	0	0	0	0	0	0	0.000106369	0	0	0	1.56873e-05	0	0	0	0	0	0	0
Bacteroidetes	Bacteroidia	Bacteroidales	Bacteroidaceae	Bacteroides	Genus_Bacteroides	ASV_0517	0	0	0	0	0	0	6.55334e-05	0	0	0	9.18189e-05	0	0	0	0	0	0	0	0	0	0	0	0	0	0	0	0	0	0	0	0	0	0	0	2.72105e-05	0	0	0	0	0	0	0	0
Bacteroidetes	Bacteroidia	Bacteroidales	Bacteroidaceae	Bacteroides	caccae	ASV_0413	0	0	0	0	0	0	0	1.14407e-05	0	0	0	8.9664e-05	0	0	0	1.15992e-05	0	0	0	0	0	9.96999e-06	0	0	0	0	0	0	0	0	0	0.000226034	0	0	0	0.000219622	0	0	0	0	0	1.01763e-05	0
Bacteroidetes	Bacteroidia	Bacteroidales	Bacteroidaceae	Bacteroides	dorei/fragilis	ASV_0103	0	0	0	0	0.00378483	0.00413579	0	0	3.61795e-05	0	0	0	0	1.17032e-05	0	0	1.04941e-05	0	0	0	6.26716e-05	0	0	0	0	1.29049e-05	4.88106e-05	0	0.00452112	0.00160191	0	0	7.62381e-05	0.000257058	0	0	1.36333e-05	4.46183e-05	0	0	0.00656676	0.00571905	1.21051e-05
Bacteroidetes	Bacteroidia	Bacteroidales	Bacteroidaceae	Bacteroides	eggerthii	ASV_0527	0	0	0	0	0	0	0	0	0	0	0	2.2416e-05	0	0	0	0	0	0	0	0	0	0	0	0	0	0	0	0	0	0	0	2.65922e-05	0	0	0	3.13745e-05	0	0	0	0	0	0	0
Bacteroidetes	Bacteroidia	Bacteroidales	Bacteroidaceae	Bacteroides	faecis/thetaiotaomicron	ASV_0304	0	0	0	0	0	0.000471315	0	0	0	4.34688e-05	0	6.7248e-05	0	0	0	0	0	0	0	0	0	0	0	0	0	0	0	0	0	0	0	0	0	0.000242777	1.36053e-05	0	0	0	0	0	0	0.000722514	0
Bacteroidetes	Bacteroidia	Bacteroidales	Bacteroidaceae	Bacteroides	nordii	ASV_0319	0	0	0	0	0	0	0.000104853	0	0	0	0.000566217	0	0	0	0	0	0	0	0	0	0	0	0	0	0	0	0	0	0	0	2.54926e-05	0	0	0	0.000448973	0	0	0	0	0	0	0	3.63152e-05
Bacteroidetes	Bacteroidia	Bacteroidales	Bacteroidaceae	Bacteroides	ovatus	ASV_0015	6.41499e-05	0	0	8.51148e-05	0.0231921	0.000282789	0.000576694	0.000617799	0.11572	0.000434688	0.00841674	0.0264509	8.03495e-05	0	9.48114e-05	0	4.19762e-05	2.05954e-05	0.000404296	0	2.50686e-05	9.96999e-06	1.1457e-05	0	2.87958e-05	0	3.25404e-05	0	0.0644616	0	0.000573585	0.00151576	0.290452	1.4281e-05	0.00896586	0.0130832	1.36333e-05	8.92366e-05	0	0	0.136797	0.000345993	0.00537465
Bacteroidetes	Bacteroidia	Bacteroidales	Bacteroidaceae	Bacteroides	ovatus/xylanisolvens	ASV_0017	0	0	3.09626e-05	0	2.01321e-05	1.17829e-05	0.00047184	0.00255128	1.80897e-05	0	0.0894163	0.201834	3.01311e-05	0.000105328	0	1.15992e-05	2.09881e-05	4.11908e-05	1.34765e-05	0	0	0	0	1.26113e-05	0.000115183	0	0.00156194	1.17412e-05	2.37954e-05	1.16081e-05	0.000904989	0.00962638	1.52476e-05	2.8562e-05	0.12808	0.267185	1.36333e-05	2.97455e-05	0	0	6.50174e-05	9.15863e-05	0.0117056
Bacteroidetes	Bacteroidia	Bacteroidales	Bacteroidaceae	Bacteroides	thetaiotaomicron	ASV_0062	0	0	1.54813e-05	0	0.00068449	0.00352308	0.000996107	0.000949581	5.42692e-05	0.000130406	0.000351973	0.0240748	2.00874e-05	0	0	0	3.14822e-05	0	0	0	1.25343e-05	0	0	1.26113e-05	0	0	8.13511e-05	0	0.000190363	0	0.000892243	0.00381598	6.09905e-05	0.000257058	0.000843526	0.0186992	1.36333e-05	0	0	0	0.000195052	0	0.00377678
Bacteroidetes	Bacteroidia	Bacteroidales	Bacteroidaceae	Phocaeicola	Genus_Phocaeicola	ASV_0034	1.06916e-05	1.61168e-05	0	1.41858e-05	0.0112538	0.00635096	0.00475772	0.00249408	0.00656657	0.00425994	0.00140789	0.0189415	4.01748e-05	3.51095e-05	0	0	7.34584e-05	4.11908e-05	0	0	0.000112809	9.96999e-06	0	0	0	1.29049e-05	8.13511e-05	8.21886e-05	0.0155146	9.28645e-05	0.00272771	0.00840314	0.00648024	0.000242777	0.00152379	0.0156559	4.08998e-05	2.97455e-05	0	3.20301e-05	0.0198791	0	0.0117056
Bacteroidetes	Bacteroidia	Bacteroidales	Bacteroidaceae	Phocaeicola	Genus_Phocaeicola	ASV_0121	0	4.83504e-05	0	0	0.00398615	0.000223874	5.24267e-05	3.43222e-05	0.00166425	0	3.06063e-05	0.000179328	0	0	0	0	1.04941e-05	0	0	1.35953e-05	1.25343e-05	0	0	0	0	3.87147e-05	0	0	0.00371208	5.80403e-05	3.8239e-05	7.97766e-05	0.00135704	0.000385588	1.36053e-05	3.13745e-05	0	2.97455e-05	0	0	0.00490881	0.000966744	8.47355e-05
Bacteroidetes	Bacteroidia	Bacteroidales	Bacteroidaceae	Phocaeicola	Genus_Phocaeicola	ASV_0161	0	0	0	0	0	0	0.00104853	1.14407e-05	0	0	0.000933492	0.00022416	1.00437e-05	0	0	0	0	0	0	0	0	0	0	0	0	0	0	0	0	0	0.00122365	6.64805e-05	0	0	0.00280268	4.70618e-05	0	0	0	0	4.8763e-05	1.01763e-05	0.00199734
Bacteroidetes	Bacteroidia	Bacteroidales	Bacteroidaceae	Phocaeicola	Genus_Phocaeicola	ASV_0271	0	0	0	0	0	0	0	0.000388985	0	0	0	0.00121046	0	0	0	0	0	0	0	0	0	0	0	0	0	0	0	0	0	0	0	0.000997208	0	0	0	0.000360807	0	0	0	1.06767e-05	0	0	0
Bacteroidetes	Bacteroidia	Bacteroidales	Bacteroidaceae	Phocaeicola	Genus_Phocaeicola	ASV_0363	0	0	0	0	0	0	0.0001966	8.00851e-05	0	0	0.000229547	0.000134496	0	0	0	0	0	0	0	0	0	0	0	0	0	0	0	0	0	0	3.8239e-05	0.000119665	0	0	1.36053e-05	6.2749e-05	0	0	0	0	0	0	9.68406e-05
Bacteroidetes	Bacteroidia	Bacteroidales	Bacteroidaceae	Phocaeicola	Genus_Phocaeicola	ASV_0512	2.13833e-05	0	0	0	2.01321e-05	0	0	0	0	0	0	0	0	0	0	0	0	1.02977e-05	0	0	1.25343e-05	0	1.1457e-05	0	0	0	0	0	0	0	0	0	0	0	0	0	0	0	1.72491e-05	0	0	0	2.42101e-05
Bacteroidetes	Bacteroidia	Bacteroidales	Barnesiellaceae	Barnesiella	Genus_Barnesiella	ASV_0107	1.06916e-05	0	0	0	0.00303994	0	0	0	0.0077424	0.000173875	0	0	0	0	0	0	2.09881e-05	0	0	0	2.50686e-05	0	0	0	0	0	0	0	0.00235574	0	0	0	0.00263784	1.4281e-05	0	0	1.36333e-05	0	0	0	0.00118657	0	0
Bacteroidetes	Bacteroidia	Bacteroidales	Barnesiellaceae	Barnesiella	Genus_Barnesiella	ASV_0127	0	0	0	0	0.000644226	2.35657e-05	0	3.43222e-05	0.00235166	0.0012606	0	0.000134496	1.00437e-05	0	0	1.15992e-05	0	0	0	0	1.25343e-05	0	0	0	0	1.29049e-05	1.62702e-05	0	0.000642475	0	0	9.30727e-05	0.000655648	0.00217072	1.36053e-05	0.000235309	0	0	0	0	0.00026007	0.000122115	0
Bacteroidetes	Bacteroidia	Bacteroidales	Barnesiellaceae	Barnesiella	Genus_Barnesiella	ASV_0175	0	0	3.09626e-05	0	0	0	0	8.00851e-05	0	0.000130406	0.000153032	0.000470736	0	0	1.18514e-05	0	0	0	0	0	0	0	0	0	0	0	3.25404e-05	1.17412e-05	0	0	3.8239e-05	0.000199442	0	0	0.000204079	0.000988297	0	0	0	1.06767e-05	1.62543e-05	0	2.42101e-05
Bacteroidetes	Bacteroidia	Bacteroidales	Barnesiellaceae	Coprobacter	Genus_Coprobacter	ASV_0476	0	0	0	0	0	0	0	0	0	0	0	0.000201744	0	0	0	0	0	0	0	0	0	0	0	0	0	0	0	0	0	0	1.27463e-05	0	0	0	1.36053e-05	1.56873e-05	0	0	0	0	0	0	0
Bacteroidetes	Bacteroidia	Bacteroidales	Muribaculaceae	Duncaniella	Genus_Duncaniella	ASV_0530	0	0	0	0	0	0	0	0	0	0	1.53032e-05	0	0	0	0	0	0	0	0	0	0	0	0	0	0	0	0	0	0	0	0	0	0	0	0	0	0	0	1.72491e-05	0	0	1.01763e-05	0
Bacteroidetes	Bacteroidia	Bacteroidales	Odoribacteraceae	Butyricimonas	Genus_Butyricimonas	ASV_0184	0	0	0	0	0.00128845	0	0	0	0.00157381	0	0.00029076	0	0	0	0	0	1.04941e-05	0	0	0	0	0	0	0	0	0	0	0	0.00233195	0	0	0	0.000914857	0	6.80263e-05	0	0	0	0	0	0.00186925	0	3.63152e-05
Bacteroidetes	Bacteroidia	Bacteroidales	Odoribacteraceae	Butyricimonas	Genus_Butyricimonas	ASV_0191	0	0	0	0	0.0010066	0	0	0	0.00126628	0	0	0	0	0	0	0	0	0	0	0	1.25343e-05	0	0	0	0	0	0	0	0.00223676	0	0	0	0.000701391	0	0	0	0	0	0	0	0.00186925	0	0
Bacteroidetes	Bacteroidia	Bacteroidales	Odoribacteraceae	Butyricimonas	Genus_Butyricimonas	ASV_0212	0	0	0	0	0	2.35657e-05	1.31067e-05	0.00016017	0.000217077	0.00252119	6.12126e-05	0.00141221	2.00874e-05	0	0	0	0	0	0	0	0	0	0	1.26113e-05	0	1.29049e-05	0	0	0	1.16081e-05	0	0.000385587	0	0.00151379	2.72105e-05	0.00119223	0	0	1.72491e-05	0	0	5.08813e-05	0
Bacteroidetes	Bacteroidia	Bacteroidales	Odoribacteraceae	Butyricimonas	Genus_Butyricimonas	ASV_0279	0	0	0	0	0	0	0	3.43222e-05	0.000180897	0	0	0.00109838	0	0	0	0	0	0	0	0	0	9.96999e-06	0	0	0	0	1.62702e-05	0	0	0	0	0.000319107	1.52476e-05	0	4.08158e-05	0.00120792	0	0	0	0	0	0	1.21051e-05
Bacteroidetes	Bacteroidia	Bacteroidales	Odoribacteraceae	Butyricimonas	Genus_Butyricimonas	ASV_0405	0	0	0	0	0	0	0	0	0	0.000304282	0	0	0	0	0	0	0	0	0	0	0	0	0	0	0	0	0	0	0	0	0	0	0	0.000456993	0	0	0	0	0	0	0	0	0
Bacteroidetes	Bacteroidia	Bacteroidales	Odoribacteraceae	Butyricimonas	Genus_Butyricimonas	ASV_0477	0	0	0	0	0	0	1.31067e-05	0	0	0	0.000168335	0	0	0	0	0	0	0	0	0	0	0	0	0	0	0	0	0	0	0	0	0	0	0	5.4421e-05	0	0	0	0	0	0	0	1.21051e-05
Bacteroidetes	Bacteroidia	Bacteroidales	Odoribacteraceae	Butyricimonas	Genus_Butyricimonas	ASV_0500	0	0	0	0	0	0	1.31067e-05	0	0	0	6.12126e-05	0	0	0	0	0	0	0	0	0	0	0	0	0	0	0	0	0	0	0	0	0	0	0	4.08158e-05	0	0	0	0	0	0	0	0
Bacteroidetes	Bacteroidia	Bacteroidales	Odoribacteraceae	Butyricimonas	Genus_Butyricimonas	ASV_0506	0	0	0	0	0	0	0	0	0	0	0	0.000156912	0	0	0	0	0	0	0	0	0	0	0	0	0	0	0	0	0	0	0	0	0	0	0	3.13745e-05	0	0	0	0	0	0	0
Bacteroidetes	Bacteroidia	Bacteroidales	Odoribacteraceae	Butyricimonas	Genus_Butyricimonas	ASV_0514	0	0	0	0	0	0	0	0	0	0	0	4.4832e-05	0	0	0	0	0	0	0	0	0	0	0	0	0	0	0	0	0	0	0	1.32961e-05	1.52476e-05	0	0	4.70618e-05	0	0	0	0	0	0	0
Bacteroidetes	Bacteroidia	Bacteroidales	Odoribacteraceae	Gabonibacter	Genus_Gabonibacter	ASV_0427	0	0	0	0	0	0	0	3.43222e-05	0	0	0	0.000268992	0	0	0	0	0	0	0	1.35953e-05	0	0	0	0	0	0	0	0	0	0	0	9.30727e-05	0	0	0	0.000125498	0	0	0	0	0	0	0
Bacteroidetes	Bacteroidia	Bacteroidales	Odoribacteraceae	Gabonibacter	Genus_Gabonibacter	ASV_0490	0	0	0	0	0	0	0	3.43222e-05	0	0	0	0.000156912	0	0	0	0	0	0	0	0	0	0	0	0	0	0	0	0	0	0	0	0	0	0	0	7.84363e-05	0	0	0	0	0	0	0
Bacteroidetes	Bacteroidia	Bacteroidales	Odoribacteraceae	Odoribacter	splanchnicus	ASV_0327	0	0	0	0	0	0	0	1.14407e-05	0	8.69376e-05	4.59095e-05	0.000156912	0	0	0	0	0	0	0	0	0	0	0	0	0	0	0	0	0	0	1.27463e-05	0.000159553	0	0	2.72105e-05	0	0	0	0	0	0	0	3.63152e-05
Bacteroidetes	Bacteroidia	Bacteroidales	Order_Bacteroidales	Order_Bacteroidales	Order_Bacteroidales	ASV_0345	0	0	0	0	0	0	0	0	0	0	0	0	0	0	0	0	0	0	0	0	0	0	0	0	0	0	0	0	0	0	0	0	0	0	0	0	0	0	0	0	0	0	0
Bacteroidetes	Bacteroidia	Bacteroidales	Order_Bacteroidales	Order_Bacteroidales	Order_Bacteroidales	ASV_0394	0	0	0	0	0	0	0	0	0	0	0	0	0	0	0	0	0	0	0	0	0	0	0	0	0	0	0	0	0	0	0	0	0	0	0	0	0	0	0	0	0	0	0
Bacteroidetes	Bacteroidia	Bacteroidales	Order_Bacteroidales	Order_Bacteroidales	Order_Bacteroidales	ASV_0479	0	0	0	1.41858e-05	0	0	0	0	0	0	0	0	0	0	0	2.31984e-05	0	0	0	6.79763e-05	0	0	0	1.26113e-05	0	0	0	0.000152636	0	0	0	1.32961e-05	0	0	0	0	0	0	0	1.06767e-05	0	0	0
Bacteroidetes	Bacteroidia	Bacteroidales	Order_Bacteroidales	Order_Bacteroidales	Order_Bacteroidales	ASV_0516	0	0	0	0	0	0	0	1.14407e-05	1.80897e-05	0	0	0	0	1.17032e-05	0	0	0	1.02977e-05	0	2.71905e-05	1.25343e-05	0	0	0	9.59859e-06	0	0	0	2.37954e-05	0	0	0	0	0	0	0	0	1.48728e-05	0	0	0	0	2.42101e-05
Bacteroidetes	Bacteroidia	Bacteroidales	Porphyromonadaceae	Parabacteroides	Genus_Parabacteroides	ASV_0068	1.06916e-05	0	1.54813e-05	0	0.00144951	0.00126077	0.00104853	0.000663562	0.00180897	4.34688e-05	0.000948796	0.00078456	4.01748e-05	1.17032e-05	1.18514e-05	0	0	1.02977e-05	1.34765e-05	0	0	0	0	0	0	0	1.62702e-05	1.17412e-05	0.000999405	0.00419051	0.00349249	0.00113017	0.00253111	0.00185653	0.00330608	0.000439243	1.36333e-05	1.48728e-05	0	0	0.00269822	0.00132291	0.00967195
Bacteroidetes	Bacteroidia	Bacteroidales	Porphyromonadaceae	Parabacteroides	Genus_Parabacteroides	ASV_0112	0	0	0	0	0	0.004124	0	0	0	0.0103456	0	0	6.02621e-05	0	0	0	1.04941e-05	0	0	0	0	0	0	0	0	0	3.25404e-05	0	0	0.00314579	0	1.32961e-05	0	0.00718335	0	0	0	0	0	0	0	0.00479302	0
Bacteroidetes	Bacteroidia	Bacteroidales	Porphyromonadaceae	Parabacteroides	Genus_Parabacteroides	ASV_0380	0	0	0	0	0	0.000106046	0	2.28815e-05	0	8.69376e-05	0	8.9664e-05	0	0	0	0	0	0	0	0	0	0	0	0	0	0	0	0	0	5.80403e-05	0	5.31844e-05	3.04952e-05	0.000185653	0	9.41236e-05	0	0	0	0	0	8.141e-05	0
Bacteroidetes	Bacteroidia	Bacteroidales	Porphyromonadaceae	Parabacteroides	Genus_Parabacteroides	ASV_0430	0	0	0	0	0	1.17829e-05	1.31067e-05	0	0	0	3.06063e-05	0	0	0	0	0	0	0	0	0	0	0	0	0	0	0	0	0	0	0	5.09853e-05	0	0	0	0.0002585	0	0	0	0	0	0	0	9.68406e-05
Bacteroidetes	Bacteroidia	Bacteroidales	Porphyromonadaceae	Parabacteroides	distasonis	ASV_0102	0	0	0	0	0	0.00490167	0	1.14407e-05	0	0.0133015	0	0	6.02621e-05	0	0	0	1.04941e-05	0	0	0	1.25343e-05	2.991e-05	0	0	0	0	1.62702e-05	0	0	0.00365654	0	9.30727e-05	3.04952e-05	0.0087257	0	7.84363e-05	0	7.43638e-05	0	0	0	0.00523059	0
Bacteroidetes	Bacteroidia	Bacteroidales	Porphyromonadaceae	Parabacteroides	distasonis	ASV_0141	0	0	0	0	0	0	0	0.000995344	0	0	0	0.00455045	1.00437e-05	0	2.37029e-05	0	0	0	0	0	0	9.96999e-06	0	0	0	0	3.25404e-05	0	0.000190363	0	0	0.00283207	0.00158575	2.8562e-05	0	0.00527092	0	0	0	0	0	0	0
Bacteroidetes	Bacteroidia	Bacteroidales	Porphyromonadaceae	Parabacteroides	goldsteinii	ASV_0524	0	0	0	0	0	0	0	0	0	0	1.53032e-05	0	0	0	0	2.31984e-05	0	0	0	0	0	0	0	0	0	0	0	0	0	0	0	0	0	0	0	1.56873e-05	1.36333e-05	0	0	0	1.62543e-05	0	1.21051e-05
Bacteroidetes	Bacteroidia	Bacteroidales	Prevotellaceae	Prevotella	Genus_Prevotella	ASV_0136	0	0	1.54813e-05	2.83716e-05	0	0	0.00325046	0	0	0	0.0024332	0	0	0	1.18514e-05	2.31984e-05	0	0	0	1.35953e-05	0	0	0	1.26113e-05	0	0	3.25404e-05	0.000270048	0	0	0.00517501	1.32961e-05	0	0	0.00964613	1.56873e-05	0	0	0	3.20301e-05	0	0	0
Bacteroidetes	Bacteroidia	Bacteroidales	Prevotellaceae	Prevotella	Genus_Prevotella	ASV_0155	0	0	3.09626e-05	0	0	0	0.00225435	0	0	0	0.00205062	0	0	0	1.18514e-05	0	0	0	0	0	0	0	0	0	0	0	4.88106e-05	0	0	0	0.00360721	0	0	0	0.00753731	0	0	0	3.44982e-05	0	0	0	0
Bacteroidetes	Bacteroidia	Bacteroidales	Prevotellaceae	Prevotella	Genus_Prevotella	ASV_0410	0	0	0	5.67432e-05	0	0	0	0	0	0	0	0	0	0	0	3.47975e-05	0	0	0	0.000122357	0	0	0	0.000176558	0	0	0	0.000375719	0	0	0	1.32961e-05	0	0	0	0	0	0	0	3.20301e-05	0	0	0
Bacteroidetes	Bacteroidia	Bacteroidales	Prevotellaceae	Prevotella	Genus_Prevotella	ASV_0449	0	1.61168e-05	0	8.51148e-05	0	0	0	0	0	0	0	0	0	0	0	2.31984e-05	0	0	0	5.43811e-05	0	0	0	1.26113e-05	0	0	0	0.000258307	0	0	0	0	0	0	0	0	0	0	0	1.06767e-05	0	0	0
Bacteroidetes	Bacteroidia	Bacteroidales	Rikenellaceae	Alistipes	Genus_Alistipes	ASV_0166	0	0	1.54813e-05	0	0	1.17829e-05	0	0.00032034	0	0.000608563	0	0.00450562	0	0	0	0	0	1.02977e-05	0	0	0	0	0	0	0	0	3.25404e-05	1.17412e-05	0	0	0	0.00114346	0	0	0	0.00491011	0	0	0	0	0	1.01763e-05	0
Bacteroidetes	Bacteroidia	Bacteroidales	Rikenellaceae	Alistipes	Genus_Alistipes	ASV_0207	0	0	0	0	8.05283e-05	0	0	0	0.0021165	0	0.000153032	0.000829392	0	0	0	0	0	0	0	0	0	0	0	0	9.59859e-06	0	1.62702e-05	0	0.000333135	0	0	0	0.00154001	0	9.52368e-05	0.000658865	0	0	0	0	0.00011378	0	0
Bacteroidetes	Bacteroidia	Bacteroidales	Rikenellaceae	Alistipes	Genus_Alistipes	ASV_0309	0	0	0	0	0	0	0	0	0	0	0.000183638	0.000493152	0	0	0	0	0	0	0	0	0	0	0	0	0	0	3.25404e-05	0	0	0	0	1.32961e-05	0	0	0.0002585	0.00100398	0	0	0	0	0	0	0
Bacteroidetes	Bacteroidia	Bacteroidales	Rikenellaceae	Alistipes	Genus_Alistipes	ASV_0353	0	0	0	0	4.02641e-05	0	0	0	0.000289436	0	0	0	0	0	0	0	0	0	0	0	0	0	0	0	0	0	0	0	0.000166568	0	0	0	0.000121981	0	0	0	0	0	0	0	6.50174e-05	0	0
Bacteroidetes	Bacteroidia	Bacteroidales	Rikenellaceae	Alistipes	Genus_Alistipes	ASV_0374	0	0	0	1.41858e-05	0	1.17829e-05	0	3.43222e-05	0	8.69376e-05	1.53032e-05	0.000134496	0	0	0	0	0	0	0	1.35953e-05	0	0	0	0	0	0	0	0	0	0	0	0.000199442	1.52476e-05	0	0	0.00017256	0	0	0	0	0	0	0
Bacteroidetes	Bacteroidia	Bacteroidales	Rikenellaceae	Alistipes	Genus_Alistipes	ASV_0480	0	0	0	0	0	0	0	0	0	0	4.59095e-05	0	0	0	0	0	0	0	0	0	0	0	0	0	0	0	0	0	0	0	0	0	0	0	1.36053e-05	0	0	0	0	0	0	0	1.21051e-05
Bacteroidetes	Bacteroidia	Bacteroidales	Rikenellaceae	Alistipes	Genus_Alistipes	ASV_0504	0	0	0	0	0	0	0	0	1.80897e-05	0	0	0	0	0	0	0	0	0	0	0	0	0	0	0	0	0	0	0	0	0	0	0	4.57429e-05	0	0	0	0	0	0	0	1.62543e-05	0	0
Bacteroidetes	Bacteroidia	Bacteroidales	Rikenellaceae	Alistipes	Genus_Alistipes	ASV_0528	0	0	0	0	0	0	0	0	1.80897e-05	0	0	0	0	0	0	0	0	0	0	0	0	0	0	0	0	0	0	0	0	0	0	0	0	1.4281e-05	0	0	0	0	0	0	0	0	0
Bacteroidetes	Bacteroidia	Bacteroidales	Rikenellaceae	Alistipes	finegoldii	ASV_0209	0	0	0	0	0	8.24801e-05	0	3.43222e-05	0	0.000652032	0	0.000246576	1.00437e-05	0	0	1.15992e-05	0	0	0	2.71905e-05	0	0	0	0	0	0	0	0	0	0.000185729	7.64779e-05	0.000172849	1.52476e-05	0.00069977	4.08158e-05	0.00017256	0	1.48728e-05	0	0	0	0.00032564	6.05254e-05
Bacteroidetes	Bacteroidia	Bacteroidales	Rikenellaceae	Alistipes	finegoldii/onderdonkii	ASV_0086	4.27666e-05	0	0	0	0.00231519	0.000129612	0.000301454	0	0.00519175	0.00269507	0.00197411	0	3.01311e-05	2.34063e-05	0	0	2.09881e-05	0	1.34765e-05	0	3.76029e-05	0	0	0	2.87958e-05	0	0	0	0.00466389	0.000174121	0.000191195	0	0.00628202	0.00174228	0.00175508	1.56873e-05	4.08998e-05	2.97455e-05	0	0	0.00143038	0.000498636	0.000726304
Bacteroidetes	Bacteroidia	Bacteroidales	Rikenellaceae	Alistipes	indistinctus	ASV_0277	0	0	0	0	0	0	0	8.00851e-05	0	0.000260813	0	0.000627648	0	0	0	1.15992e-05	0	0	0	0	0	0	0	3.78339e-05	0	0	1.62702e-05	0	2.37954e-05	0	1.27463e-05	0.000292514	4.57429e-05	0	2.72105e-05	0.00138048	0	0	0	0	0	0	0
Bacteroidetes	Bacteroidia	Bacteroidales	Rikenellaceae	Alistipes	inops	ASV_0377	0	0	0	0	0	0	0	0	0	0	0	0	0	0	2.37029e-05	0	0	0	0	1.35953e-05	0	0	1.1457e-05	1.26113e-05	0	0	0	9.39298e-05	0	0	0	0	0	0	0	0	0	0	1.72491e-05	1.06767e-05	0	0	0
Bacteroidetes	Bacteroidia	Bacteroidales	Rikenellaceae	Alistipes	marseilloanorexicus	ASV_0336	0	1.61168e-05	0	0	0	1.17829e-05	0	0	0	0.000478157	0	0	0	3.51095e-05	0	0	1.04941e-05	0	0	0	0	0	0	0	0	2.58098e-05	0	0	0	0	0	0	0	0.000899704	0	0	0	0	0	0	0	1.01763e-05	0
Bacteroidetes	Bacteroidia	Bacteroidales	Rikenellaceae	Alistipes	obesi	ASV_0129	0	0	0	1.41858e-05	0.000704622	0	0	4.57629e-05	0.00184515	0	0.000443792	0.0015467	1.00437e-05	0	1.18514e-05	1.15992e-05	0	1.02977e-05	1.34765e-05	1.35953e-05	0	0	0	1.26113e-05	0	0	1.62702e-05	1.17412e-05	0.00116597	0	2.54926e-05	0.000412179	0.00121981	0	0.000408158	0.0018511	0	0	0	0	0.000357596	0	0.000121051
Bacteroidetes	Bacteroidia	Bacteroidales	Rikenellaceae	Alistipes	putredinis	ASV_0106	0	0	3.09626e-05	0	0.0021944	0	0	1.14407e-05	0.00674747	0	0.000107122	0	0	0	1.18514e-05	0	0	0	0	0	0	0	0	0	0	0	0	1.17412e-05	0.00573468	0	2.54926e-05	0	0.00295804	1.4281e-05	0.0007755	3.13745e-05	0	0	1.72491e-05	0	0.00326712	0	3.63152e-05
Bacteroidetes	Bacteroidia	Bacteroidales	Rikenellaceae	Alistipes	senegalensis	ASV_0273	0	0	0	0	0	0	1.31067e-05	3.43222e-05	0.00128437	0	4.59095e-05	0.000156912	0	0	0	0	0	0	0	0	0	0	0	0	0	0	0	0	0	0	0	0.000212738	0	0	0	0.000141185	0	0	1.72491e-05	0	0	0	1.21051e-05
Bacteroidetes	Bacteroidia	Bacteroidales	Rikenellaceae	Alistipes	shahii	ASV_0143	0	0	0	0	0	0	0.000144173	8.00851e-05	0.00171852	0	0.00142319	0.000291408	0	0	0	0	0	0	0	0	0	0	0	1.26113e-05	0	0	0	0	0	0	0.000216687	0.000106369	0.000670895	0	0.00185031	0.000203934	0	0	0	0	0	0	0.00076262
Bacteroidetes	Bacteroidia	Bacteroidales	Rikenellaceae	Alistipes	shahii	ASV_0158	0	0	0	1.41858e-05	0	0.000176743	0	8.00851e-05	0	0.0059987	0	0.00044832	0	0	0	0	0	0	0	0	0	0	0	0	0	0	0	0	0	0.000266986	0	0.000159553	0	0.00204219	0	0.000250996	0	0	0	0	0	0.000234054	0
Bacteroidetes	Flavobacteriia	Flavobacteriales	Flavobacteriaceae	Family_Flavobacteriaceae	Family_Flavobacteriaceae	ASV_0216	1.06916e-05	0	0	0	0	0	0	0	0.00224313	0	0	0	0	0	0	0	0	0	0	0	0	0	0	0	0	0	1.62702e-05	0	2.37954e-05	0	0	0	0.00112832	0	0	0	0	0	0	0	6.50174e-05	0	0
Candidatus_Saccharibacteria	Phylum_Candidatus_Saccharibacteria	Phylum_Candidatus_Saccharibacteria	Phylum_Candidatus_Saccharibacteria	Phylum_Candidatus_Saccharibacteria	Phylum_Candidatus_Saccharibacteria	ASV_0484	0	0	0.000123851	0	0	0	0	0	0	0	0	0	0	0	3.55543e-05	0	0	0	0	0	0	0	0	0	9.59859e-06	2.58098e-05	0.000113892	0	0	0	0	0	0	0	0	0	0	0	1.72491e-05	0	0	0	0
Candidatus_Saccharibacteria	Phylum_Candidatus_Saccharibacteria	Phylum_Candidatus_Saccharibacteria	Phylum_Candidatus_Saccharibacteria	Phylum_Candidatus_Saccharibacteria	Phylum_Candidatus_Saccharibacteria	ASV_0518	0	0	0	0	0	1.17829e-05	1.31067e-05	0	0	0	0	0	1.00437e-05	0	0	0	0	0	0	0	0	0	1.1457e-05	0	0	0	1.62702e-05	0	0	0	0	0	0	0	0	0	0	0	3.44982e-05	0	0	0	0
Firmicutes	Bacilli	Bacillales	Bacillaceae_1	Family_Bacillaceae_1	Family_Bacillaceae_1	ASV_0035	0	0	0	0	0	0	0	0	0	0	0	0	0	1.17032e-05	4.74057e-05	0	0	0	0	0	0	0	0	0	0	1.29049e-05	3.25404e-05	0	0	0	0	0	0	0.000785456	0	0	0	2.97455e-05	5.17473e-05	2.13534e-05	0	0	0
Firmicutes	Bacilli	Bacillales	Bacillales_Incertae_Sedis_XI	Gemella	sanguinis	ASV_0510	0	0	0	0	0	0	0	0	0	0	0	0	2.00874e-05	1.17032e-05	1.18514e-05	0	0	0	0	0	0	0	0	0	0	1.29049e-05	0	1.17412e-05	0	0	0	0	0	0	0	0	5.45331e-05	1.48728e-05	1.72491e-05	0	0	0	0
Firmicutes	Bacilli	Bacillales	Listeriaceae	Listeria	innocua/ivanovii/marthii/monocytogenes/seeligeri/welshimeri	ASV_0047	0	0	0	0	0	0	0	0	0	0	0	0	0	0	1.18514e-05	0	0	0	0	0	0	0	0	0	0	0	0	0	0	0	0	0	0	0.000528398	0	0	0	1.48728e-05	0	0	0	0	0
Firmicutes	Bacilli	Bacillales	Staphylococcaceae	Staphylococcus	argenteus/aureus/equorum/haemolyticus/lugdunensis/simiae	ASV_0050	0	0	0	1.41858e-05	0	0	0	0	0	0	0	0	0	0	2.37029e-05	0	0	0	0	0	0	0	0	0	0	1.29049e-05	0	0	0	0	0	1.32961e-05	0	0.000571241	0	0	0	0	0	1.06767e-05	0	0	0
Firmicutes	Bacilli	Bacillales	Staphylococcaceae	Staphylococcus	aureus	ASV_0126	0	0	0	0	0	0	0	0	0	0	0	0	0	0	0	0	0	0	0	0	0	0	0	0	0	0	0	0	0	0	0	0	0	5.71241e-05	0	0	0	0	0	0	0	1.01763e-05	0
Firmicutes	Bacilli	Lactobacillales	Carnobacteriaceae	Granulicatella	adiacens/para-adiacens	ASV_0379	9.62248e-05	3.22336e-05	0	5.67432e-05	0	0	0	0	0	0	0	0	3.01311e-05	1.17032e-05	1.18514e-05	2.31984e-05	0	1.02977e-05	0	1.35953e-05	0	0	0	2.52226e-05	9.59859e-05	6.45245e-05	3.25404e-05	0.000117412	2.37954e-05	0	0	0	0	0	0	1.56873e-05	9.54329e-05	4.46183e-05	0	6.40601e-05	0	0	0
Firmicutes	Bacilli	Lactobacillales	Enterococcaceae	Enterococcus	Genus_Enterococcus	ASV_0016	0.000331441	1.61168e-05	0.000216738	8.51148e-05	0.00388549	0.000954412	0.0192406	0.00348942	0.000578871	0.00034775	0.0178129	0.00123288	0.00027118	2.34063e-05	0.000225177	8.11943e-05	0.0847185	0.126538	0.0366292	0.0014275	0.0498239	0.0944357	0.0626124	0.0049184	0.000220768	3.87147e-05	0.000309134	0.000129153	0.000690065	0.00133493	0.0106559	0.000611621	0.000381191	0.00069977	0.00586387	0.00112948	0.000395365	7.43638e-05	0.178546	0.00016015	0.00308833	0.00101763	0.0214623
Firmicutes	Bacilli	Lactobacillales	Enterococcaceae	Enterococcus	Genus_Enterococcus	ASV_0408	0	0	0	0	0	0	0	0	0	0	0	0	0	0	0	0	0.000598161	1.02977e-05	0	0	0.000112809	0	0	0	0	0	0	0	0	0	0	0	0	0	0	0	0	0	1.72491e-05	0	0	0	0
Firmicutes	Bacilli	Lactobacillales	Enterococcaceae	Enterococcus	Genus_Enterococcus	ASV_0437	0	0	0	0	2.01321e-05	0	1.31067e-05	1.14407e-05	0	0	3.06063e-05	0	0	0	0	0	6.29644e-05	7.20839e-05	2.69531e-05	0	5.01373e-05	3.988e-05	1.1457e-05	0	0	0	0	0	0	0	0	0	0	0	0	0	0	0	3.44982e-05	0	0	0	2.42101e-05
Firmicutes	Bacilli	Lactobacillales	Enterococcaceae	Enterococcus	avium/gilvus	ASV_0031	0.000288674	0	1.54813e-05	0	0.0381503	0	0	0	0.00564399	0	0	0	0.000251092	0	1.18514e-05	0	0.0984553	0	1.34765e-05	0	0.0403103	9.96999e-06	0	0	0.00020157	1.29049e-05	1.62702e-05	0	0.0133968	0	0	0	0.00541291	0	0	0	0.000408998	0	1.72491e-05	1.06767e-05	0.0208543	0	0
Firmicutes	Bacilli	Lactobacillales	Enterococcaceae	Enterococcus	casseliflavus/faecium/gallinarum/saccharolyticus	ASV_0249	1.06916e-05	0	0	0	0.00058383	0	0	0	0.000235166	0	0	0	0	0	0	0	0.00145867	0	0	0	0.00172974	0	0	0	0	0	0	0	9.51814e-05	0	0	0	1.52476e-05	0	0	0	0	0	0	0	0.000146289	0	0
Firmicutes	Bacilli	Lactobacillales	Enterococcaceae	Enterococcus	devriesei/hermanniensis/pseudoavium/viikkiensis/xiangfangensis	ASV_0250	2.13833e-05	0	0	0	0.00010066	0	0	0	0	0	0	0	7.03058e-05	0	0	0	0.00277043	0	0	0	0.00111555	9.96999e-06	0	0	3.83943e-05	0	0	0	0	0	0	0	0	0	0	0	4.08998e-05	0	0	0	9.75261e-05	0	0
Firmicutes	Bacilli	Lactobacillales	Enterococcaceae	Enterococcus	durans/faecalis/faecium	ASV_0064	0	0	0	0	0	3.53486e-05	0.000104853	9.15259e-05	0	0	6.12126e-05	0	0	0	0	0	0	9.26794e-05	4.04296e-05	0	0	0.00011964	2.2914e-05	0	0	0	0	0	0	0	1.27463e-05	0	0	0	1.36053e-05	1.56873e-05	0	0	0	0	0	4.0705e-05	0
Firmicutes	Bacilli	Lactobacillales	Enterococcaceae	Enterococcus	durans/faecalis/faecium/lactis	ASV_0226	0	0	0	0	4.02641e-05	1.17829e-05	5.24267e-05	3.43222e-05	3.61795e-05	0	1.53032e-05	0	0	0	0	0	0.00182597	0.00149317	0	1.35953e-05	0.000852333	0.00134595	1.1457e-05	0	0	0	0	0	0	1.16081e-05	2.54926e-05	0	0	0	1.36053e-05	0	0	0	0	0	3.25087e-05	7.12338e-05	0
Firmicutes	Bacilli	Lactobacillales	Enterococcaceae	Enterococcus	lemanii	ASV_0054	2.13833e-05	0	0	0	0.0139515	0	0	0	0.00235166	0	1.53032e-05	0	5.02185e-05	0	0	0	0.0397305	0	0	0	0.0173851	9.96999e-06	0	0	2.87958e-05	0	0	0	0.00414039	0	1.27463e-05	1.32961e-05	0.00225665	0	0	0	2.72665e-05	0	0	0	0.00866357	0	0
Firmicutes	Bacilli	Lactobacillales	Enterococcaceae	Enterococcus	malodoratus/mundtii/pernyi/pseudoavium	ASV_0467	0	0	0	0	0	0	0	0	0	0	0	0	0	0	0	0	9.44465e-05	0	0	0	0.000188015	0	2.2914e-05	2.52226e-05	0	0	0	0	0	0	0	0	0	0	0	0	0	0	0	0	0	0	0
Firmicutes	Bacilli	Lactobacillales	Lactobacillaceae	Lacticaseibacillus	Genus_Lacticaseibacillus	ASV_0364	0	0	0	1.41858e-05	0	0	0	0	0	0	0	0	0	0	0	1.15992e-05	0	0	0	1.35953e-05	0	0	0.000882188	7.56678e-05	0	0	0	0	0	0	0	0	0	0	0	0	6.81663e-05	5.94911e-05	0.000103495	9.60902e-05	0	1.01763e-05	0
Firmicutes	Bacilli	Lactobacillales	Lactobacillaceae	Lactobacillus	Genus_Lactobacillus	ASV_0272	0	3.22336e-05	0	0	0	0	0	0	0	0	0	0	0	0	0	0	0	0	0	0.00153627	0	0	0	0.00292582	0	0	0	0	0	0	0	0	0	0	0	0	0	0	0	0	0	0	0
Firmicutes	Bacilli	Lactobacillales	Lactobacillaceae	Lactobacillus	Genus_Lactobacillus	ASV_0307	0	1.61168e-05	0	0	0	0	0	0	0	0	0	0	0	0	0	0	0	0	0	0.000992455	0	0	0	0.00205564	0	0	0	0	0	0	0	0	0	0	0	0	0	0	0	0	0	0	0
Firmicutes	Bacilli	Lactobacillales	Lactobacillaceae	Lactobacillus	Genus_Lactobacillus	ASV_0475	0	0	0	0	0	1.17829e-05	0	0	0	0	0	0	0	0	0	0	0	0.000113275	0	0	0	0.00013958	0	0	0	0	0	0	0	1.16081e-05	0	0	0	0	0	0	0	0	0	0	0	0	0
Firmicutes	Bacilli	Lactobacillales	Lactobacillaceae	Lactobacillus	Genus_Lactobacillus	ASV_0482	0	0	0	0	0	1.17829e-05	0	0	0	0	0	0	0	0	0	0	0	0.000113275	0	1.35953e-05	0	0.00013958	0	0	0	0	0	0	0	0	0	0	0	0	0	0	0	0	0	0	0	0	0
Firmicutes	Bacilli	Lactobacillales	Lactobacillaceae	Lactobacillus	delbrueckii	ASV_0148	0	6.44673e-05	0	0	0	0	0	0	0	0	0	0	0	0	0	1.15992e-05	0	0	0	0.0066209	0	0	0	0.0148183	0	0	0	1.17412e-05	0	0	0	0	0	0	0	0	0	0	0	0	0	0	0
Firmicutes	Bacilli	Lactobacillales	Lactobacillaceae	Lactobacillus	delbrueckii/gasseri/johnsonii	ASV_0033	0	0.00203072	0	8.51148e-05	0	0.0070108	0	6.86444e-05	0	0.00791132	0	0	2.00874e-05	0.001498	0.000402949	2.31984e-05	1.04941e-05	0.0865213	0.000107812	0.0230032	0	0.0797998	0.00202789	0.0272278	9.59859e-06	0.00166473	0	2.34824e-05	0	0.00323865	2.54926e-05	2.65922e-05	0	0.00167088	0	4.70618e-05	0	0.000922111	1.72491e-05	2.13534e-05	0	0.00220825	1.21051e-05
Firmicutes	Bacilli	Lactobacillales	Lactobacillaceae	Latilactobacillus	Genus_Latilactobacillus	ASV_0523	0	0	0	0	0	0	0	0	0	0	0	0	0	0	0	0	0	0	0	0	0	0	0	0	0	0	0	1.17412e-05	0	0	0	0	0	0	0	0	0	0	1.72491e-05	2.13534e-05	0	0	0
Firmicutes	Bacilli	Lactobacillales	Lactobacillaceae	Lentilactobacillus	Genus_Lentilactobacillus	ASV_0503	0	0	0	0	0	0	0	0	0	0	0	0	0	0	0	0	0	0	0	0	0.000250686	0	0	0	0	0	0	0	0	0	0	0	0	0	0	0	0	1.48728e-05	0	0	0	0	0
Firmicutes	Bacilli	Lactobacillales	Lactobacillaceae	Levilactobacillus	Genus_Levilactobacillus	ASV_0270	0	0	0	0	0	0	0	0	0	0	0	0	0	1.17032e-05	0	0	0	0.00162704	0	0	0	0.00174475	0	0	0	0	0	0	0	0	0	0	0	0	0	0	6.81663e-05	5.94911e-05	8.62456e-05	1.06767e-05	3.25087e-05	1.01763e-05	0
Firmicutes	Bacilli	Lactobacillales	Lactobacillaceae	Ligilactobacillus	Genus_Ligilactobacillus	ASV_0116	0	1.61168e-05	0	0	0	0.000200309	0	0	0	0.000173875	0	0	0	0.000105328	0.000106663	0	0	0.0155392	0	0	0	0.018265	0	0	0	0	0	0	0	0	0	0	0	0	0	0	0	0	0	0	0	1.01763e-05	0
Firmicutes	Bacilli	Lactobacillales	Lactobacillaceae	Ligilactobacillus	Genus_Ligilactobacillus	ASV_0235	0	0	0	0	0	5.89143e-05	0	0	0	0	0	0	0	0	1.18514e-05	0	0	0.00257443	0	0	0	0.00300097	0	0	0	0	0	0	0	0	0	0	0	0	0	0	0	0	0	0	0	0	0
Firmicutes	Bacilli	Lactobacillales	Lactobacillaceae	Limosilactobacillus	Genus_Limosilactobacillus	ASV_0039	0	0.000177285	0	0	0	0	0	0	0	4.34688e-05	0	0	0	0	2.37029e-05	0	0	0	0	0.0129699	0	0	0	0.0571796	0	0	0	0	0	0	0	0	0	0.000342745	0	0	0	0	0	0	0	0	0
Firmicutes	Bacilli	Lactobacillales	Lactobacillaceae	Limosilactobacillus	Genus_Limosilactobacillus	ASV_0204	0	6.44673e-05	0	0	0	0	0	0	0	0	0	0	0	0	0	0	0	0	0	5.43811e-05	0	0	0	0.00986203	0	0	0	0	0	0	0	0	0	0	0	0	0	0	0	0	0	0	0
Firmicutes	Bacilli	Lactobacillales	Lactobacillaceae	Paucilactobacillus	Genus_Paucilactobacillus	ASV_0526	0	0	0	0	0	0	0	0	0	0	0	0	0	0	0	0	0	0	0	0	0	0	0	0	0	0	0	0	0	0	0	0	0	0	0	0	1.36333e-05	0	5.17473e-05	1.06767e-05	3.25087e-05	0	1.21051e-05
Firmicutes	Bacilli	Lactobacillales	Lactobacillaceae	Pediococcus	acidilactici/damnosus/pentosaceus/stilesii	ASV_0101	0	0	0	0	0	0	0	0	0	0	0	0	0	0	0	0	0	0	0.000215625	0	0	9.96999e-06	0.0486005	0	0	0	0	3.52237e-05	0	0	0	0	0	0	0	0	0	0	0	0	0	0	0
Firmicutes	Bacilli	Lactobacillales	Streptococcaceae	Lactococcus	garvieae/lactis	ASV_0104	8.55331e-05	6.44673e-05	7.74066e-05	4.25574e-05	0.00048317	0	0	1.14407e-05	0.000126628	0	4.59095e-05	4.4832e-05	0.000110481	4.68126e-05	7.11086e-05	2.31984e-05	0.0228246	0	1.34765e-05	2.71905e-05	0.0152543	9.96999e-06	0	0	5.75915e-05	6.45245e-05	6.50809e-05	7.04473e-05	0	1.16081e-05	0	0	0	0	0	0	0.000204499	7.43638e-05	8.62456e-05	5.33834e-05	0.000195052	0	0
Firmicutes	Bacilli	Lactobacillales	Streptococcaceae	Streptococcus	Genus_Streptococcus	ASV_0139	0.000224524	0.000177285	0	0.00343296	0	0	0	0.000617799	0	4.34688e-05	0	0.0005604	0.000281223	7.0219e-05	0	0.00163548	2.09881e-05	0	0	0.000679763	0	0	0	0.000441395	0.000297556	0.000129049	0	0.00348714	0	0	0	0.000678101	0	0	0	0.000784363	0.000190866	0.000104109	0	0.00188977	0	0	0
Firmicutes	Bacilli	Lactobacillales	Streptococcaceae	Streptococcus	australis/cristatus/dentisani/infantis/mitis/oligofermentans/oralis/parasanguinis/peroris/pneumoniae/pseudopneumoniae/pyogenes/rubneri/salivarius/sanguinis/tigurinus	ASV_0198	0.000630807	9.67009e-05	0.000572809	0.000453946	2.01321e-05	0	2.62134e-05	8.00851e-05	1.80897e-05	0	3.06063e-05	8.9664e-05	0.000331442	5.85158e-05	0.000260731	0.000208785	4.19762e-05	0	0.000377343	8.15716e-05	1.25343e-05	0	0.000423908	0.000113502	0.000345549	6.45245e-05	0.000520647	0.00066925	2.37954e-05	0	1.27463e-05	3.98883e-05	3.04952e-05	0	4.08158e-05	4.70618e-05	0.000340832	2.97455e-05	0.000482975	0.000341654	4.8763e-05	0	0
Firmicutes	Bacilli	Lactobacillales	Streptococcaceae	Streptococcus	gordonii/mitis	ASV_0421	0	0	0.000170294	1.41858e-05	0	0	0	0	0	0	0	0	0	0	8.296e-05	5.79959e-05	0	0	4.04296e-05	0	0	0	3.4371e-05	0	0	0	3.25404e-05	7.04473e-05	0	0	0	0	0	0	0	0	0	0	5.17473e-05	2.13534e-05	0	0	0
Firmicutes	Bacilli	Lactobacillales	Streptococcaceae	Streptococcus	mitis/parasanguinis	ASV_0220	5.34582e-05	4.83504e-05	0.000263182	0.000482317	0	0	2.62134e-05	6.86444e-05	0	0	1.53032e-05	2.2416e-05	4.01748e-05	2.34063e-05	0.000213326	0.00013919	0	0	0.000835546	0.000108762	0	0	0.00148941	0.000113502	3.83943e-05	0.000103239	0.000227783	0.000927557	0	0	3.8239e-05	2.65922e-05	0	0	0	9.41236e-05	5.45331e-05	0.000178473	0.000206989	0.000320301	0	0	1.21051e-05
Firmicutes	Bacilli	Lactobacillales	Streptococcaceae	Streptococcus	mutans	ASV_0352	3.20749e-05	8.05841e-05	6.19253e-05	8.51148e-05	2.01321e-05	0	2.62134e-05	1.14407e-05	1.80897e-05	0	1.53032e-05	0	0	2.34063e-05	8.296e-05	3.47975e-05	2.09881e-05	0	2.69531e-05	0	0	0	4.58279e-05	0	1.91972e-05	5.16196e-05	0.000162702	1.17412e-05	0	2.32161e-05	1.27463e-05	1.32961e-05	1.52476e-05	0	0	0	2.72665e-05	7.43638e-05	3.44982e-05	6.40601e-05	1.62543e-05	0	0
Firmicutes	Bacilli	Lactobacillales	Streptococcaceae	Streptococcus	parasanguinis	ASV_0440	0	0	0	0.000141858	0	0	0	0	0	0	0	0	0	0	0	1.15992e-05	0	0	0	0	0	0	0	1.26113e-05	0	0	0	0.000117412	0	0	0	0	0	0	0	0	0	0	0	5.33834e-05	0	0	0
Firmicutes	Bacilli	Lactobacillales	Streptococcaceae	Streptococcus	salivarius	ASV_0043	0.0241952	0.000322336	0.00424188	0.000978821	0.0037647	5.89143e-05	0.000170387	0.000354663	0.00115774	0	9.18189e-05	0.000134496	0.021845	0.000105328	0.00186067	0.000916335	0.000850019	0	0.000458202	0.00023112	0.00130357	0	0.000355167	0.000252226	0.020061	0.000283908	0.00335166	0.00200775	0.00176086	0	0.00014021	3.98883e-05	0.00105209	0	2.72105e-05	0.000266683	0.0280164	0.000133855	0.00179391	0.00107835	0.00261695	0	7.26304e-05
Firmicutes	Bacilli	Lactobacillales	Streptococcaceae	Streptococcus	salivarius/vestibularis	ASV_0071	0.000203141	0.000451271	0.00970678	0.00361738	4.02641e-05	5.89143e-05	0.000642227	0.000217374	0	0	0.000321366	0.00022416	0.000231005	0.000234063	0.0112826	0.00200666	0	1.02977e-05	0.00136113	0.000625382	0	0	0.00120298	0.000378339	0.000230366	0.000696864	0.00930656	0.00450863	4.75907e-05	2.32161e-05	0.000509853	0.000199442	0	0	0.000312921	0.000376494	0.000422631	0.00026771	0.00934902	0.00255173	1.62543e-05	1.01763e-05	0.000217891
Firmicutes	Clostridia	Class_Clostridia	Class_Clostridia	Class_Clostridia	Class_Clostridia	ASV_0085	0	3.22336e-05	0	0.00536223	0	2.35657e-05	0	0.00618944	0	8.69376e-05	4.59095e-05	0.00585057	1.00437e-05	0	0	0.00331737	0	0	0	0.00133234	0	0	1.1457e-05	0.000895402	0	0	4.88106e-05	0.0110133	0	0	0	0.00429464	0	4.28431e-05	0.000122447	0.00748282	0	0	0	0.0041212	3.25087e-05	1.01763e-05	0
Firmicutes	Clostridia	Class_Clostridia	Class_Clostridia	Class_Clostridia	Class_Clostridia	ASV_0164	0	1.61168e-05	0	0.00113486	0	0	0	0.00145297	0	0	0	0.00121046	0	0	0	0.000719149	0	0	0	0.000312691	0	0	0	0.000239615	0	0	0	0.00304098	0	0	0	0.000944023	0	0	4.08158e-05	0.00178835	0	0	0	0.000800752	0	0	0
Firmicutes	Clostridia	Class_Clostridia	Class_Clostridia	Class_Clostridia	Class_Clostridia	ASV_0389	0	0	0	7.0929e-05	0	0	0	1.14407e-05	0	0	0	4.4832e-05	0	0	0	3.47975e-05	0	0	0	0.00025831	0	0	0	0.000176558	0	0	0	9.39298e-05	0	0	0	0	0	0	0	0	0	0	0	8.54135e-05	0	0	0
Firmicutes	Clostridia	Class_Clostridia	Class_Clostridia	Class_Clostridia	Class_Clostridia	ASV_0481	0	0	0	1.41858e-05	0	0	0	0	0	0	0	0	0	0	0	0	0	0	0	6.79763e-05	0	0	0	2.52226e-05	0	0	0	0.000152636	0	0	0	0	0	0	0	0	0	0	0	3.20301e-05	0	0	0
Firmicutes	Clostridia	Clostridiales	Christensenellaceae	Beduinibacterium	Genus_Beduinibacterium	ASV_0293	0	1.61168e-05	7.74066e-05	0.000113486	0	0	0	0	0	0	0	4.4832e-05	0	0	4.74057e-05	9.27934e-05	0	0	0	0.000203929	0	0	1.1457e-05	0.000403561	0	0	9.76213e-05	0.000516614	0	0	0	3.98883e-05	0	0	0	0	0	0	0	0.000181504	0	0	0
Firmicutes	Clostridia	Clostridiales	Christensenellaceae	Christensenella	Genus_Christensenella	ASV_0509	1.06916e-05	0	0	0	0	0	0	0	0	0	0	0	0	0	0	0	0	0	0	0	0	0	0	0	0	0	0	0	0	0	0	0	0	0	0	0	0	0	0	0	0	0	0
Firmicutes	Clostridia	Clostridiales	Clostridiaceae_1	Clostridium_sensu_stricto	Genus_Clostridium_sensu_stricto	ASV_0257	0	0	0	0	0	0	2.62134e-05	0	0	0	0	0	0	0	0	0	0	3.08931e-05	0.00118594	0	0	1.994e-05	0.00318504	0	0	0	0	0	0	0	0	0	0	0	0	0	0	0	0	0	0	0	0
Firmicutes	Clostridia	Clostridiales	Clostridiaceae_1	Clostridium_sensu_stricto	baratii/moniliforme/sardiniense	ASV_0059	0	0	0	0	0	0	1.31067e-05	0	0	0	0	0	0	0	0	0	0	0	0.111047	0	0	0	0.00547644	0	9.59859e-06	0	1.62702e-05	0	0	0	0	0	0	0	0	0	0	0	6.89964e-05	0	0	0	0
Firmicutes	Clostridia	Clostridiales	Clostridiaceae_1	Clostridium_sensu_stricto	butyricum	ASV_0055	0	1.61168e-05	0	0	0	0.000483097	0	0	0	0.000478157	0	0	0	0.000409611	3.55543e-05	0	0	0.0471944	1.34765e-05	0	0	0.0035892	0	0	0	0	0	0	0	0.000325026	1.27463e-05	0	0	8.56861e-05	1.36053e-05	0	0	1.48728e-05	0	0	0	0.00065128	2.42101e-05
Firmicutes	Clostridia	Clostridiales	Clostridiaceae_1	Clostridium_sensu_stricto	perfringens	ASV_0069	0	0	1.54813e-05	0	0	0.000353486	9.17467e-05	0	0	0	0	0	0	0.000245766	0.000213326	0	0	0.0311918	0.00138808	2.71905e-05	0	0.0382648	0.00362041	6.30565e-05	9.59859e-06	0	0	0	0	1.16081e-05	1.27463e-05	0	0	1.4281e-05	0	0	2.72665e-05	7.43638e-05	0	0	0	1.01763e-05	0
Firmicutes	Clostridia	Clostridiales	Clostridiaceae_1	Clostridium_sensu_stricto	perfringens/thermophilus	ASV_0013	1.06916e-05	1.61168e-05	0	5.67432e-05	0	0.00579717	0.0422428	0.000217374	0	0.000999783	4.59095e-05	0	0.000180786	0.00303112	0.00227547	0	3.14822e-05	0.324017	0.035349	0.000543811	2.50686e-05	0.398361	0.106424	0.00163947	7.67887e-05	0	0	5.87061e-05	0	0.000406282	0.00602901	0.000319107	1.52476e-05	2.8562e-05	6.80263e-05	4.70618e-05	2.72665e-05	0.00026771	1.72491e-05	1.06767e-05	0.000227561	0.000213701	0.00128314
Firmicutes	Clostridia	Clostridiales	Clostridiaceae_1	Family_Clostridiaceae_1	Family_Clostridiaceae_1	ASV_0014	3.20749e-05	0.00101536	0.00879339	0.000907892	0	2.35657e-05	0.0207479	0.000354663	1.80897e-05	4.34688e-05	0.00957978	2.2416e-05	3.01311e-05	0.0014746	0.0127521	0.000811943	0.365896	9.26794e-05	0.0121424	6.79763e-05	0.495143	7.97599e-05	0.00351729	0.000126113	5.75915e-05	0.00123887	0.0115193	0.000152636	0	1.16081e-05	0.0175262	2.65922e-05	3.04952e-05	4.28431e-05	0.00227208	7.84363e-05	0.000163599	0.00242426	0.0107634	0.00182571	1.62543e-05	1.01763e-05	0.000895775
Firmicutes	Clostridia	Clostridiales	Eubacteriaceae	Anaerofustis	stercorihominis	ASV_0252	0.000983631	4.83504e-05	0	0	0.000161057	0	0	0	5.42692e-05	4.34688e-05	0	0	0.000361573	4.68126e-05	0	0	0	0	0	0	0	0	0	0	0.00088307	9.03342e-05	0	0	4.75907e-05	0	0	0	0.000106733	9.99672e-05	0	0	0.000477164	7.43638e-05	0	0	1.62543e-05	0	0
Firmicutes	Clostridia	Clostridiales	Eubacteriaceae	Eubacterium	Genus_Eubacterium	ASV_0185	0	0	0.000278664	0.0015037	0	0	0	5.72037e-05	0	0	0	4.4832e-05	0	1.17032e-05	3.55543e-05	0.000927934	0	0	0	0	0	0	0	0	0	0	0.000341675	0.00406246	0	0	0	5.31844e-05	0	1.4281e-05	0	4.70618e-05	0	0	0.000155242	0.00179368	0	0	0
Firmicutes	Clostridia	Clostridiales	Eubacteriaceae	Eubacterium	sulci	ASV_0464	6.41499e-05	1.61168e-05	1.54813e-05	1.41858e-05	2.01321e-05	0	0	0	0	0	0	0	0	0	1.18514e-05	0	0	0	0	0	0	0	0	0	5.75915e-05	0	4.88106e-05	0	2.37954e-05	0	0	0	0	0	0	0	4.08998e-05	0	0	0	1.62543e-05	0	0
Firmicutes	Clostridia	Clostridiales	Lachnospiraceae	Agathobacter	Genus_Agathobacter	ASV_0197	0	0	0.000557327	0.000751848	0	2.35657e-05	0.000576694	6.86444e-05	0	0.00034775	0.000214244	2.2416e-05	1.00437e-05	1.17032e-05	4.74057e-05	0.000382773	0	0	0	0.000367072	0	0	0	0.000428784	0	1.29049e-05	0.000553187	0.000504873	0	0	0.000305912	2.65922e-05	0	4.28431e-05	0.000421763	4.70618e-05	0	1.48728e-05	0.000327733	0.000448421	1.62543e-05	0	2.42101e-05
Firmicutes	Clostridia	Clostridiales	Lachnospiraceae	Anaerobutyricum	Genus_Anaerobutyricum	ASV_0027	6.41499e-05	0.0389382	0.00465988	0.0248961	0	0.00351129	0.0112586	0.00855767	5.42692e-05	0.00130406	0.00570808	0.00248818	0.000120524	0.0290941	0.000568869	0.0166796	0	0.000350122	0	0.00233839	1.25343e-05	0.00711857	0	0.000769289	7.67887e-05	0.0522648	0.00548306	0.0128919	0	0.00629157	0.0147985	0.00317777	0	0.00489839	0.00167345	0.00495717	5.45331e-05	0.0411827	0.00360506	0.0308236	0.000585157	0.00281882	0.00340153
Firmicutes	Clostridia	Clostridiales	Lachnospiraceae	Anaerobutyricum	Genus_Anaerobutyricum	ASV_0269	0	0	0.000247701	1.41858e-05	0	0	0.00100921	2.28815e-05	0	0	0.000474398	0	0	0	2.37029e-05	0	0	0	0	0	0	0	0	0	0	0	0.000455566	0	0	0	0.00110893	1.32961e-05	0	0	0.000122447	1.56873e-05	0	0	0.00018974	0	4.8763e-05	0	0.000242101
Firmicutes	Clostridia	Clostridiales	Lachnospiraceae	Anaerobutyricum	Genus_Anaerobutyricum	ASV_0291	0	0.000273986	1.54813e-05	7.0929e-05	0	5.89143e-05	9.17467e-05	0.000102967	0	0	3.06063e-05	4.4832e-05	0	0.000163844	0	0.000243583	0	0	0	4.07858e-05	0	9.96999e-06	0	0	0	0.000438766	6.50809e-05	5.87061e-05	0	2.32161e-05	0.000152956	3.98883e-05	0	1.4281e-05	1.36053e-05	1.56873e-05	0	0.000282583	0.000103495	0.000234887	0	0	4.84203e-05
Firmicutes	Clostridia	Clostridiales	Lachnospiraceae	Anaerostipes	hadrus	ASV_0010	0.131186	0.0969426	0.00130043	0.00700779	0.0381301	0.00447749	0.00357812	0.000892377	0.0152135	0.00239078	0.00125486	0.000605232	0.12643	0.0913783	5.92572e-05	0.00476726	0.000682114	0.000144168	0	0.00123717	0.00151665	0	0	0.00039095	0.158146	0.126378	0.00172464	0.00409769	0.00316478	0.00401639	0.00386214	0.000704694	0.00112832	0.00417006	0.000353737	0.000376494	0.161282	0.100049	0.0019319	0.00589353	0.00443744	0.0044979	0.000459993
Firmicutes	Clostridia	Clostridiales	Lachnospiraceae	Anaerotignum	Genus_Anaerotignum	ASV_0088	0	0	0	0	0	0	0	0	0	0	0	0	0	1.17032e-05	0	0	0	0	0	0	0	0	0	0	0	1.29049e-05	0	0	0	0	0	0	0	0	0	0	0	1.48728e-05	0	0	0	0	0
Firmicutes	Clostridia	Clostridiales	Lachnospiraceae	Anaerotignum	Genus_Anaerotignum	ASV_0115	0	0	0	0	0.000301981	0	0	0	0.000850217	0	0	0	1.00437e-05	0	1.18514e-05	0	0	0	0	0	0	0	0	0	0	0	0	0	0	0	0	0	0.014165	0	0	0	0	0	0	0	0	0	0
Firmicutes	Clostridia	Clostridiales	Lachnospiraceae	Anaerotignum	Genus_Anaerotignum	ASV_0123	0	0	0	0	0.0047713	0	0	0	0.000144718	0	0	0	0	0	0	0	0	0	0	0	0	0	0	0	0	0	0	0	0.00321237	0	0	0	0.00106733	0	0	0	0	0	1.72491e-05	0	0.000357596	0	0
Firmicutes	Clostridia	Clostridiales	Lachnospiraceae	Anaerotignum	Genus_Anaerotignum	ASV_0174	0	0	0	0	0	0	0	0	0	0	0	0	0	0	0	0	0	0	0	0	0	0	0	0	0	1.29049e-05	0	0	0	0	0	0	0	0	0	0	0	0	0	0	0	0	0
Firmicutes	Clostridia	Clostridiales	Lachnospiraceae	Blautia	Genus_Blautia	ASV_0049	0.0210198	0	0	5.67432e-05	0.00193268	1.17829e-05	5.24267e-05	2.28815e-05	0.000126628	4.34688e-05	6.12126e-05	0	0.0209712	1.17032e-05	0	0	0.00221425	4.11908e-05	0	5.43811e-05	0.00630476	2.991e-05	0	0	0.0209057	0	0	1.17412e-05	0.000594884	0	0.000165702	1.32961e-05	0.000289705	0	0.000149658	6.2749e-05	0.0296933	0	1.72491e-05	0	0.000942752	0	0
Firmicutes	Clostridia	Clostridiales	Lachnospiraceae	Blautia	Genus_Blautia	ASV_0097	0.00533513	0	0.000185776	1.41858e-05	0.000704622	0	0	0	0.000126628	0	4.59095e-05	0	0.00992317	0	4.74057e-05	0	0.00115435	1.02977e-05	0	1.35953e-05	0.00338426	0	0	0	0.00567276	0	0.000113892	0	9.51814e-05	0	1.27463e-05	0	9.14857e-05	0	1.36053e-05	0	0.0104976	0	6.89964e-05	0	0.00026007	0	0
Firmicutes	Clostridia	Clostridiales	Lachnospiraceae	Blautia	Genus_Blautia	ASV_0110	1.06916e-05	0	0	0.00522038	0	0	0	0.00169323	0	0	0	0.00033624	5.02185e-05	1.17032e-05	0	0.00458168	0	0	0	0.00205289	0	0	1.1457e-05	0.00292582	0	0	1.62702e-05	0.00358107	0	0	1.27463e-05	0.000438771	0	1.4281e-05	0	0.000784363	0	0	0	0.00697188	1.62543e-05	0	0
Firmicutes	Clostridia	Clostridiales	Lachnospiraceae	Blautia	Genus_Blautia	ASV_0130	1.06916e-05	1.61168e-05	0	0.00313506	0	0	0	0	0	0	0	0	1.00437e-05	0	0	0.00244743	0	0	0	0.00208008	0	0	0	0.00479229	0	0	0	0.00184337	0	0	0	3.98883e-05	0	1.4281e-05	0	0	0	0	1.72491e-05	0.00359804	1.62543e-05	0	0
Firmicutes	Clostridia	Clostridiales	Lachnospiraceae	Blautia	Genus_Blautia	ASV_0147	0	4.83504e-05	0	0.00266693	0	0	0	5.72037e-05	0	0	0	0	1.00437e-05	2.34063e-05	0	0.00151949	0	0	0	0.00133234	0	0	0	0.00456529	0	1.29049e-05	0	0.00152636	0	0	0	3.98883e-05	0	0	0	0	0	1.48728e-05	0	0.00294677	1.62543e-05	0	0
Firmicutes	Clostridia	Clostridiales	Lachnospiraceae	Blautia	Genus_Blautia	ASV_0190	0.00173205	0	0	0	8.05283e-05	0	0	0	0	0	0	0	0.00171747	0	0	0	4.19762e-05	0	0	0	6.26716e-05	0	0	0	0.00148778	0	0	0	9.51814e-05	0	0	0	3.04952e-05	0	0	0	0.00222222	0	0	0	6.50174e-05	0	0
Firmicutes	Clostridia	Clostridiales	Lachnospiraceae	Blautia	Genus_Blautia	ASV_0217	0	0.000580205	0.000278664	0.000666733	0	0	3.932e-05	0	0	0	1.53032e-05	0	0	0.000608564	0.000130366	0.000301579	0	0	0	0.000421453	0	0	0	0.000655787	0	0.000593625	0.000211513	0.000223083	0	0	0	0	0	0	0	0	1.36333e-05	0.000461056	0.000155242	0.000661955	0	1.01763e-05	0
Firmicutes	Clostridia	Clostridiales	Lachnospiraceae	Blautia	Genus_Blautia	ASV_0292	0.000203141	1.61168e-05	3.09626e-05	9.93006e-05	0	0	0	2.28815e-05	0	0	1.53032e-05	0	0.000703058	2.34063e-05	1.18514e-05	3.47975e-05	0	0	0	4.07858e-05	5.01373e-05	0	0	2.52226e-05	0.000345549	1.29049e-05	6.50809e-05	3.52237e-05	0	0	0	0	0	0	0	0	0.000381731	1.48728e-05	3.44982e-05	7.47368e-05	1.62543e-05	0	0
Firmicutes	Clostridia	Clostridiales	Lachnospiraceae	Blautia	Genus_Blautia	ASV_0314	6.41499e-05	1.61168e-05	0	9.93006e-05	4.02641e-05	0	0	0	0	0	0	0	0.000140612	5.85158e-05	1.18514e-05	0.000162389	0	0	0	0.000163143	1.25343e-05	0	0	0.000302671	4.79929e-05	5.16196e-05	0	5.87061e-05	0	0	0	0	0	0	0	0	0.000190866	2.97455e-05	0	0.000266917	0	0	0
Firmicutes	Clostridia	Clostridiales	Lachnospiraceae	Blautia	Genus_Blautia	ASV_0351	0	0	7.74066e-05	0	0	0	1.31067e-05	0	0	0	1.53032e-05	0	3.01311e-05	0	7.11086e-05	0	0	0	2.69531e-05	0	1.25343e-05	0	1.1457e-05	0	9.59859e-06	0	6.50809e-05	0	0	0	0	0	0	0	2.72105e-05	0	1.36333e-05	0	8.62456e-05	0	0	0	0
Firmicutes	Clostridia	Clostridiales	Lachnospiraceae	Blautia	luti/obeum/wexlerae	ASV_0012	0.050069	0.0184215	0.0329907	0.0895692	0.00159043	0.000589143	0.00272619	0.0138433	0.000343705	0.000130406	0.00175986	0.00511085	0.0865565	0.0207614	0.031513	0.0642826	0.00364144	0.000195656	0.000835546	0.028822	0.0105539	2.991e-05	0.000171855	0.0642672	0.0642913	0.0229836	0.0308646	0.0493836	0.000618679	0.000325026	0.00265124	0.00769844	0.000487924	0.000242777	0.000748289	0.00870643	0.098623	0.0241236	0.0264946	0.09167	0.00172296	0.000763219	0.00131945
Firmicutes	Clostridia	Clostridiales	Lachnospiraceae	Butyrivibrio	Genus_Butyrivibrio	ASV_0005	5.34582e-05	0.000177285	0.000185776	0.000127672	0.0997745	0.0025451	0.269001	0.0200556	0.0573263	0.0724625	0.244361	0.0050436	0.00131572	4.68126e-05	5.92572e-05	4.63967e-05	0.000230869	3.08931e-05	0.000134765	4.07858e-05	6.26716e-05	0	1.1457e-05	0	0.000143979	5.16196e-05	0.000797241	3.52237e-05	0.238667	0.0060478	0.180717	0.028334	0.0515522	0.0587664	0.153413	0.121498	1.36333e-05	0.000178473	0.000155242	7.47368e-05	0.0503885	3.05288e-05	0.367401
Firmicutes	Clostridia	Clostridiales	Lachnospiraceae	Coprococcus	Genus_Coprococcus	ASV_0286	0	0	0.000170294	0.000241159	0	0	1.31067e-05	2.28815e-05	0	0	1.53032e-05	0	0	0	0	9.27934e-05	0	0	0	0.000910883	0	0	0	0.00058012	0	0	0.000162702	0.000317013	0	0	2.54926e-05	2.65922e-05	0	0	1.36053e-05	1.56873e-05	0	0	8.62456e-05	0.000170827	0	0	2.42101e-05
Firmicutes	Clostridia	Clostridiales	Lachnospiraceae	Dorea	Genus_Dorea	ASV_0168	0	0	0.00185776	0	0	0	0.000301454	0	0	4.34688e-05	0.0014385	0	0	0	0.000509612	0	0	0	1.34765e-05	0	0	0	0	0	0	0	0.00128535	0	0	0	0.000369643	0	0	0	0.00114284	0	0	0	0.00108669	0	0	0	0.000617359
Firmicutes	Clostridia	Clostridiales	Lachnospiraceae	Dorea	Genus_Dorea	ASV_0325	0	0	0.000309626	0	0	0	0.0001966	0	0	0	0.00024485	0	0	0	1.18514e-05	0	0	0	0	0	0	0	0	0	0	0	0.000325404	0	0	0	0.000203941	0	0	0	0.000244895	0	0	1.48728e-05	0.000241488	0	0	1.01763e-05	0.000217891
Firmicutes	Clostridia	Clostridiales	Lachnospiraceae	Dorea	longicatena	ASV_0023	1.06916e-05	0.0229826	0.0152336	0.0152356	0.00392575	0.00736429	0.00663198	0.0267255	0.000615051	0.00660726	0.0119824	0.00150187	0.000441922	0.0163961	0.0033184	0.0120283	1.04941e-05	2.05954e-05	0	0.0171572	0	7.97599e-05	0	0.00147552	5.75915e-05	0.0259001	0.0125281	0.0159681	0.00547293	0.00260021	0.00523874	0.0130036	0.000869114	0.0143953	0.00870736	0.00254134	5.45331e-05	0.0247929	0.00981474	0.0122462	0.000438867	0.00106851	0.00817092
Firmicutes	Clostridia	Clostridiales	Lachnospiraceae	Enterocloster	Genus_Enterocloster	ASV_0221	0	0	0	0	0	0	0	0.000755088	0	0	1.53032e-05	0.000582816	1.00437e-05	0	0	0	0	0	0	1.35953e-05	0	0	0	0	0	1.29049e-05	1.62702e-05	0	0	0	1.27463e-05	0.00156894	0	0	0	0.00191385	0	0	0	1.06767e-05	0	0	0
Firmicutes	Clostridia	Clostridiales	Lachnospiraceae	Enterocloster	Genus_Enterocloster	ASV_0406	0	0	0	0	0	0	0	0	1.80897e-05	0	0	0	0	0	0	0	0	0	0	0	0	0	0	0	0	0	0	0	0	0	0	0	0	0	0	0	0	0	0	0	0	0	0
Firmicutes	Clostridia	Clostridiales	Lachnospiraceae	Enterocloster	Genus_Enterocloster	ASV_0417	0	0	1.54813e-05	0	0	0	0.00011796	0	0	0	6.12126e-05	0	0	0	0	0	0	0	0	0	0	0	0	0	0	0	0	0	0	0	2.54926e-05	0	0	0	1.36053e-05	0	0	0	0	0	0	0	6.05254e-05
Firmicutes	Clostridia	Clostridiales	Lachnospiraceae	Faecalicatena	Genus_Faecalicatena	ASV_0120	0.00357101	0	0	4.25574e-05	0.000785151	0	0	0	0.00166425	0	0	0	0.00347512	1.17032e-05	1.18514e-05	1.15992e-05	0.000136423	0	0	0	0.000225618	0	0	0	0.00356108	1.29049e-05	0	0	0.000285544	0	0	0	0.000731886	0	0	0	0.00399455	1.48728e-05	0	2.13534e-05	0.000357596	0	0
Firmicutes	Clostridia	Clostridiales	Lachnospiraceae	Family_Lachnospiraceae	Family_Lachnospiraceae	ASV_0004	0.0915418	0.0477864	0.0096139	0.0241584	0.0128644	0.41478	0.025807	0.164186	0.00544501	0.523017	0.0180118	0.218646	0.0942399	0.0407738	0.00360283	0.0166912	0.0293099	0.0329527	0.0446613	0.00955747	0.0296311	0.0144465	0.00650757	0.00843696	0.102129	0.063634	0.00859067	0.0184807	0.00302201	0.49816	0.0276723	0.00312458	0.00216516	0.361795	0.0212786	0.00851818	0.102672	0.0526496	0.00531273	0.021268	0.00962257	0.342207	0.0222975
Firmicutes	Clostridia	Clostridiales	Lachnospiraceae	Family_Lachnospiraceae	Family_Lachnospiraceae	ASV_0036	0.00310058	0.000273986	4.64439e-05	0.00026953	0.0147971	1.17829e-05	5.24267e-05	5.72037e-05	0.00530029	8.69376e-05	0.000137728	0.000134496	0.00138603	0.000315985	0.000106663	0.000185587	3.14822e-05	1.02977e-05	0	4.07858e-05	6.26716e-05	9.96999e-06	0	2.52226e-05	0.00217888	0.000529101	9.76213e-05	0.000223083	0.0015467	5.80403e-05	3.8239e-05	0	0.00327824	1.4281e-05	6.80263e-05	6.2749e-05	0.00163599	0.000401565	5.17473e-05	0.000202857	0.000877735	3.05288e-05	1.21051e-05
Firmicutes	Clostridia	Clostridiales	Lachnospiraceae	Family_Lachnospiraceae	Family_Lachnospiraceae	ASV_0060	1.06916e-05	0	0	0	0	0	0	0	0	0	0	0	1.00437e-05	0	0	0	2.09881e-05	0	2.69531e-05	0	0	0	0	0	9.59859e-06	0	0	0	0	0	1.27463e-05	0	0	0	0	0	0	0	0	0	0.039303	0	0
Firmicutes	Clostridia	Clostridiales	Lachnospiraceae	Family_Lachnospiraceae	Family_Lachnospiraceae	ASV_0065	0	0	9.28879e-05	0.00182997	0	0	0.000288347	0.000194492	1.80897e-05	0	0.0215928	8.9664e-05	0	0	1.18514e-05	0.00042917	0	0	0	0.000598192	0	0	0	0.000416173	1.91972e-05	3.87147e-05	0.000162702	0.00335799	0	0	1.27463e-05	0.000119665	0	0	0.0062176	1.56873e-05	0	0	1.72491e-05	0.00108902	1.62543e-05	0	1.21051e-05
Firmicutes	Clostridia	Clostridiales	Lachnospiraceae	Family_Lachnospiraceae	Family_Lachnospiraceae	ASV_0089	0.000898098	6.44673e-05	0.000263182	0.000680919	0.00535513	8.24801e-05	0.00193979	0.000183052	0.00928003	0.000217344	0.00238729	0.000313824	0.000622709	5.85158e-05	0.000130366	0.000695951	2.09881e-05	1.02977e-05	0	0.000326286	1.25343e-05	0	1.1457e-05	0.000668399	0.000758288	5.16196e-05	0.000211513	0.00159681	0.000118977	3.48242e-05	0.00114717	3.98883e-05	7.62381e-05	5.71241e-05	0.00106121	0.00051768	0.000927062	5.94911e-05	0.000241488	0.000768722	0.000162543	2.03525e-05	0.00278417
Firmicutes	Clostridia	Clostridiales	Lachnospiraceae	Family_Lachnospiraceae	Family_Lachnospiraceae	ASV_0122	0	9.67009e-05	0	1.41858e-05	0	5.89143e-05	0.00142863	0.000560596	0	0.000173875	0.00254032	0.00217435	0	4.68126e-05	0	1.15992e-05	0	0	0	0	0	0.00032901	0	0	0	7.74293e-05	3.25404e-05	7.04473e-05	0.00149911	0	0.00400235	0.00134291	0.00108258	0	0.00527884	0.00334139	0	1.48728e-05	0	0	0	1.01763e-05	7.26304e-05
Firmicutes	Clostridia	Clostridiales	Lachnospiraceae	Family_Lachnospiraceae	Family_Lachnospiraceae	ASV_0146	0	0	0	1.41858e-05	0	0	0	0	0	0	0	0	0	0	0	0	1.04941e-05	1.02977e-05	0	0	0	0	0	0	0	0	0	0	2.37954e-05	0	0	0	0	0	1.36053e-05	0	0	0	0	0	0.00741198	0	0
Firmicutes	Clostridia	Clostridiales	Lachnospiraceae	Family_Lachnospiraceae	Family_Lachnospiraceae	ASV_0156	1.06916e-05	0	0.000154813	0.00313506	0	1.17829e-05	1.31067e-05	1.14407e-05	0	4.34688e-05	1.53032e-05	2.2416e-05	1.00437e-05	0	0.000142217	0.0013455	0	0	0	0.00205289	0	0	0	0.000151336	0	0	0.000244053	0.0034167	0	0	0	3.98883e-05	0	2.8562e-05	0	0	0	0	0.000103495	0.00211398	1.62543e-05	1.01763e-05	3.63152e-05
Firmicutes	Clostridia	Clostridiales	Lachnospiraceae	Family_Lachnospiraceae	Family_Lachnospiraceae	ASV_0177	1.06916e-05	0	0	0	0.000181189	0	0.000144173	0	0.000144718	0	3.06063e-05	0	1.00437e-05	0	0	0	0	0	0	0	0	0	0	0	2.87958e-05	0	0	1.17412e-05	0	0	1.27463e-05	2.65922e-05	0	0	1.36053e-05	0	4.08998e-05	0	0	0	0.00549397	0	3.63152e-05
Firmicutes	Clostridia	Clostridiales	Lachnospiraceae	Family_Lachnospiraceae	Family_Lachnospiraceae	ASV_0210	2.13833e-05	1.61168e-05	0.000139332	0.000893706	0	0	2.62134e-05	5.72037e-05	0	0	0	2.2416e-05	6.02621e-05	2.34063e-05	7.11086e-05	0.000487166	0	0	0	0.00148188	0	0	0	0.00142508	2.87958e-05	5.16196e-05	9.76213e-05	0.00112716	0	0	0	6.64805e-05	0	0	0	3.13745e-05	2.72665e-05	2.97455e-05	6.89964e-05	0.000683308	0	1.01763e-05	0
Firmicutes	Clostridia	Clostridiales	Lachnospiraceae	Family_Lachnospiraceae	Family_Lachnospiraceae	ASV_0222	0.00119746	0	0	0	2.01321e-05	0	0	0	0	0	0	0	0.00141616	0	0	0	9.44465e-05	0	0	0	7.52059e-05	0	0	0	0.00117103	0	0	0	4.75907e-05	0	0	0	3.04952e-05	0	0	0	0.00144513	0	0	0	4.8763e-05	0	0
Firmicutes	Clostridia	Clostridiales	Lachnospiraceae	Family_Lachnospiraceae	Family_Lachnospiraceae	ASV_0224	2.13833e-05	0	1.54813e-05	2.83716e-05	0	0	0	1.14407e-05	3.61795e-05	8.69376e-05	3.06063e-05	2.2416e-05	1.00437e-05	0	0	0.000197186	0	0	0	2.71905e-05	1.25343e-05	0	0	5.04452e-05	9.59859e-06	0	0	0.000446166	2.37954e-05	1.16081e-05	0	0	3.04952e-05	0	5.4421e-05	0.000141185	1.36333e-05	0	1.72491e-05	8.54135e-05	0	0	1.21051e-05
Firmicutes	Clostridia	Clostridiales	Lachnospiraceae	Family_Lachnospiraceae	Family_Lachnospiraceae	ASV_0243	0.000577349	0	0	0	0.000120792	0	0	0	7.23589e-05	0	0	0	0.000934063	0	0	0	5.24703e-05	0	0	0	0.000112809	0	0	0	0.00081588	0	0	0	4.75907e-05	0	0	0	0	1.4281e-05	0	0	0.000858896	0	0	1.06767e-05	3.25087e-05	0	0
Firmicutes	Clostridia	Clostridiales	Lachnospiraceae	Family_Lachnospiraceae	Family_Lachnospiraceae	ASV_0274	0	3.22336e-05	9.28879e-05	0.000113486	0	0	0.00015728	4.57629e-05	0	0	4.59095e-05	0.00011208	0	2.34063e-05	5.92572e-05	3.47975e-05	0	0	0	2.71905e-05	0	0	1.1457e-05	1.26113e-05	0	0	0.000178972	0.000246566	0	0	0.000216687	1.32961e-05	0	0	0.000136053	0.00017256	0	1.48728e-05	6.89964e-05	0.000106767	0	0	3.63152e-05
Firmicutes	Clostridia	Clostridiales	Lachnospiraceae	Family_Lachnospiraceae	Family_Lachnospiraceae	ASV_0283	0.000748415	0	0	1.41858e-05	0	0	0	0	0	0	0	0	0.000562447	0	0	0	1.04941e-05	0	0	0	0	0	0	0	0.000623908	0	0	0	0	0	0	0	0	0	0	0	0.000640763	0	0	0	0	0	0
Firmicutes	Clostridia	Clostridiales	Lachnospiraceae	Family_Lachnospiraceae	Family_Lachnospiraceae	ASV_0295	0	0	0	1.41858e-05	0	0	1.31067e-05	0	0	0	0.00123956	0	0	0	0	0	0	0	0	0	0	0	0	0	0	0	0	0	0	0	0	0	0	0	0.000149658	0	0	0	0	0	0	0	0
Firmicutes	Clostridia	Clostridiales	Lachnospiraceae	Family_Lachnospiraceae	Family_Lachnospiraceae	ASV_0316	0	0	0	0	4.02641e-05	0	0.000366987	0	0	4.34688e-05	0.00024485	0	0	0	0	0	0	0	0	0	0	0	0	0	0	0	0	0	7.13861e-05	0	0.000178449	3.98883e-05	1.52476e-05	0	0.000217684	4.70618e-05	0	0	0	0	0	0	0.000459993
Firmicutes	Clostridia	Clostridiales	Lachnospiraceae	Family_Lachnospiraceae	Family_Lachnospiraceae	ASV_0344	0	0	0	0	0	0	0	0	0	0	0	0.000268992	0	1.17032e-05	0	2.31984e-05	0	0	0	2.71905e-05	0	0	0	2.52226e-05	0	0	1.62702e-05	0	0	0	0	0	0	0	0	0.000313745	0	0	1.72491e-05	1.06767e-05	0	0	0
Firmicutes	Clostridia	Clostridiales	Lachnospiraceae	Family_Lachnospiraceae	Family_Lachnospiraceae	ASV_0350	8.55331e-05	3.22336e-05	0	4.25574e-05	0	0.000129612	1.31067e-05	6.86444e-05	0	0.000130406	1.53032e-05	2.2416e-05	0.000120524	5.85158e-05	0	0	0	0	0	0	0	0	0	0	0.000115183	1.29049e-05	0	0	0	0.000116081	0	0	0	0.000185653	0	0	9.54329e-05	4.46183e-05	0	2.13534e-05	0	8.141e-05	0
Firmicutes	Clostridia	Clostridiales	Lachnospiraceae	Family_Lachnospiraceae	Family_Lachnospiraceae	ASV_0361	0.000342133	0	0	0	0	0	0	0	0	0	0	0	0.000140612	0	0	0	0	0	0	0	0	0	0	0	0.000182373	0	0	0	0	0	0	0	0	0	0	0	0.000354465	0	0	0	0	0	0
Firmicutes	Clostridia	Clostridiales	Lachnospiraceae	Family_Lachnospiraceae	Family_Lachnospiraceae	ASV_0450	0	0	0	0	0	0	0	0	0.000162808	0	0	0	0	0	0	0	0	0	0	0	0	0	0	0	0	0	0	0	0	0	0	0	0.000121981	0	0	0	0	0	0	0	0	0	0
Firmicutes	Clostridia	Clostridiales	Lachnospiraceae	Kineothrix	Genus_Kineothrix	ASV_0228	0.000577349	0.000193402	1.54813e-05	1.41858e-05	0.000140924	0.000271006	2.62134e-05	6.86444e-05	1.80897e-05	0	0	0	0.000984282	0.000198954	0	2.31984e-05	0	0	0	0	0	0	0	0	0.000796683	0.000283908	0	1.17412e-05	0	0.000116081	0	0	0	0.000214215	0	0	0.000558964	0.000208219	3.44982e-05	2.13534e-05	1.62543e-05	0.000172996	1.21051e-05
Firmicutes	Clostridia	Clostridiales	Lachnospiraceae	Kineothrix	Genus_Kineothrix	ASV_0328	0.000149683	0	0	0	0	0	0	0	1.80897e-05	0	0	0	0.00038166	0	0	0	0	0	0	0	0	0	0	0	0.000335951	1.29049e-05	0	0	2.37954e-05	1.16081e-05	0	0	0	1.4281e-05	0	0	0.000449898	0	0	0	1.62543e-05	0	0
Firmicutes	Clostridia	Clostridiales	Lachnospiraceae	Lachnobacterium	Genus_Lachnobacterium	ASV_0499	0	0	0	2.83716e-05	0	0	0	0	0	0	0	0	0	0	0	2.31984e-05	0	0	0	0	0	0	0	0	0	0	0	0.000152636	0	0	0	0	0	0	0	0	0	0	0	1.06767e-05	0	0	0
Firmicutes	Clostridia	Clostridiales	Lachnospiraceae	Lachnospira	Genus_Lachnospira	ASV_0113	1.06916e-05	8.05841e-05	0.00171843	0.00017023	4.02641e-05	0.000377052	0.00389268	3.43222e-05	0.000108538	0.0020865	0.00162213	0.000134496	0	8.19221e-05	0.00123255	5.79959e-05	0	0	0.000107812	4.07858e-05	0	5.98199e-05	0.00011457	3.78339e-05	0	1.29049e-05	0.00205005	0.000246566	0	0.000197337	0.00384939	2.65922e-05	9.14857e-05	2.8562e-05	0.0012925	9.41236e-05	0	2.97455e-05	0.000931452	6.40601e-05	0.000520139	0.000132291	0.00174313
Firmicutes	Clostridia	Clostridiales	Lachnospiraceae	Lachnospira	Genus_Lachnospira	ASV_0124	0	0	0.000897916	4.25574e-05	0	1.17829e-05	0.00015728	1.14407e-05	0	0.000130406	4.59095e-05	0	1.00437e-05	9.36253e-05	0.000616274	2.31984e-05	0	0.00788804	0.000956835	0	0	0.00714848	0.000515564	1.26113e-05	0	0	0.00112264	4.69649e-05	0	3.48242e-05	0.000650062	1.32961e-05	0	0	0.00054421	6.2749e-05	0	2.97455e-05	0.00039673	2.13534e-05	3.25087e-05	5.08813e-05	0.000229996
Firmicutes	Clostridia	Clostridiales	Lachnospiraceae	Lachnospira	Genus_Lachnospira	ASV_0390	0	0	0.000123851	0	0	0	0	0	0	0	1.53032e-05	4.4832e-05	0	0	5.92572e-05	3.47975e-05	0	0	1.34765e-05	1.35953e-05	0	0	0	1.26113e-05	0	0	0.000244053	4.69649e-05	0	0	0	0	0	0	0	0	0	0	5.17473e-05	3.20301e-05	1.62543e-05	0	0
Firmicutes	Clostridia	Clostridiales	Lachnospiraceae	Mediterraneibacter	Genus_Mediterraneibacter	ASV_0046	0.00673573	0.00807452	0.00690467	0.00426993	0.000120792	0.000282789	0.000419414	0.000675003	0	0.000782439	0.000321366	0.000762144	0.00257118	0.00525472	0.00632866	0.00361894	3.14822e-05	1.02977e-05	5.39062e-05	0.0178914	0.000137877	0	8.01989e-05	0.00996292	0.00427137	0.00823332	0.00650809	0.00340495	2.37954e-05	0.000429498	0.000254926	0.000531844	0	0.000185653	0.0002585	0.000533367	0.00400818	0.00889391	0.004847	0.00447353	8.12717e-05	0.000213701	0.000145261
Firmicutes	Clostridia	Clostridiales	Lachnospiraceae	Mediterraneibacter	Genus_Mediterraneibacter	ASV_0237	0.00129369	0.000241752	0	0	0	0	1.31067e-05	0	1.80897e-05	0.000217344	0	2.2416e-05	0.000492141	5.85158e-05	0	0	0	0	0	0	2.50686e-05	0	0	0	0.000979056	0.000232288	0	0	2.37954e-05	0	0	0	0	1.4281e-05	0	0	0.000845262	0.000223091	0	0	1.62543e-05	1.01763e-05	0
Firmicutes	Clostridia	Clostridiales	Lachnospiraceae	Mediterraneibacter	Genus_Mediterraneibacter	ASV_0266	0	0	0	0.00026953	0	0	0	0.000137289	0	0	0	0.00011208	0	0	0	0.00041757	0	0	0	0.00137312	0	0	0	0.00058012	0	0	0	0.000176118	0	0	0	3.98883e-05	0	0	0	1.56873e-05	0	0	0	0.000395037	0	0	0
Firmicutes	Clostridia	Clostridiales	Lachnospiraceae	Roseburia	Genus_Roseburia	ASV_0246	3.20749e-05	3.22336e-05	1.54813e-05	1.41858e-05	0	0.00102511	3.932e-05	0	0	0.000434688	0.000137728	0	7.03058e-05	4.68126e-05	0	2.31984e-05	0	0	0	1.35953e-05	0	0.000658019	0	0	3.83943e-05	1.29049e-05	6.50809e-05	2.34824e-05	0	0.00121885	2.54926e-05	0	0	5.71241e-05	8.16315e-05	0	9.54329e-05	1.48728e-05	0	2.13534e-05	0	0.000101763	0
Firmicutes	Clostridia	Clostridiales	Lachnospiraceae	Roseburia	intestinalis/inulinivorans	ASV_0018	0.00132576	0.00375522	0.00388581	0.00615664	0.000865679	0.00671623	0.0728469	0.00727631	0.000217077	0.0165181	0.0494751	0.0283562	0.00263145	0.00204805	0.0028799	0.00458168	3.14822e-05	0.000236847	9.43358e-05	0.00462239	5.01373e-05	0.0180557	2.2914e-05	0.00425001	0.00143979	0.0042199	0.00452312	0.01207	0.00114218	0.00630318	0.121256	0.00420157	0.00356794	0.00488411	0.100393	0.0157814	0.00167689	0.00452132	0.00220789	0.00488992	9.75261e-05	0.00227948	0.00232417
Firmicutes	Clostridia	Clostridiales	Lachnospiraceae	Sellimonas	Genus_Sellimonas	ASV_0094	0.000737723	1.61168e-05	0.000464439	2.83716e-05	0.00547592	0	5.24267e-05	0	0.00139291	0	0.000122425	0	0.00145634	0	0.000367394	0	7.34584e-05	0	1.34765e-05	0	8.77402e-05	0	0	0	0.0006815	2.58098e-05	0.000536917	0	0.0020464	0	8.92243e-05	0	0.00356794	0	2.72105e-05	0	0.00155419	2.97455e-05	0.000310484	0	0.00464874	0	2.42101e-05
Firmicutes	Clostridia	Clostridiales	Order_Clostridiales	Order_Clostridiales	Order_Clostridiales	ASV_0052	1.06916e-05	0.00296549	0.00535653	0.00622757	0	0.000129612	9.17467e-05	0.000915259	0	4.34688e-05	0.00029076	0.00367622	5.02185e-05	0.00188421	0.00340136	0.00489485	0	0.000154466	0.000283007	0.00439127	0	8.97299e-05	0.000412451	0.00544808	0	0.00326494	0.00584101	0.0209581	0	0.000174121	7.64779e-05	0.00106369	0	0	2.72105e-05	0.0018511	2.72665e-05	0.00373306	0.00310484	0.00648075	1.62543e-05	0.000101763	3.63152e-05
Firmicutes	Clostridia	Clostridiales	Order_Clostridiales	Order_Clostridiales	Order_Clostridiales	ASV_0074	0	3.22336e-05	0	0.00462457	0	0	0	0.00102967	0	0	0	0.00161395	0	0	0	0.0042801	0	0	0	0.0166134	0	0	0	0.0100134	0	0	1.62702e-05	0.01706	0	0	0	0.00148916	0	0	0	0.00155304	0	0	0	0.00519955	1.62543e-05	0	0
Firmicutes	Clostridia	Clostridiales	Order_Clostridiales	Order_Clostridiales	Order_Clostridiales	ASV_0096	0	0.00452882	0.00365359	0.000964635	0	0.000176743	0.000262134	0.000377544	1.80897e-05	0.000217344	9.18189e-05	0.000986304	2.00874e-05	0.00284387	0.00284434	0.000765546	0	0.000123572	0	0.000883692	0	0.00016949	0	0.000239615	0	0.004749	0.00396993	0.000739697	0	0.000220553	0.000229434	0.000146257	0	0.000242777	0.000122447	0.000470618	0	0.00413463	0.00220789	0.00120647	1.62543e-05	4.0705e-05	0.000157366
Firmicutes	Clostridia	Clostridiales	Order_Clostridiales	Order_Clostridiales	Order_Clostridiales	ASV_0178	0	1.61168e-05	9.28879e-05	0.000468132	0	0	0	2.28815e-05	0	0	0	0.00011208	0	0	9.48114e-05	0.000173988	0	0	0	0.000720549	0	0	2.2914e-05	0.00112241	0	0	0.000162702	0.00200775	0	0	0	0.000132961	0	0	0	4.70618e-05	0	0	0.000120744	0.000427068	0	0	0
Firmicutes	Clostridia	Clostridiales	Order_Clostridiales	Order_Clostridiales	Order_Clostridiales	ASV_0181	0	0	1.54813e-05	0	0	0	0	0	0.00463097	0	0	0	0	0	2.37029e-05	0	0	0	0	0	0	0	0	0	0	0	0	0	0	0	0	0	0.00111308	0	0	0	0	0	0	0	0	0	0
Firmicutes	Clostridia	Clostridiales	Order_Clostridiales	Order_Clostridiales	Order_Clostridiales	ASV_0186	0.00157167	0	0	2.83716e-05	4.02641e-05	0	0	1.14407e-05	0	0	0	0	0.00145634	0	0	5.79959e-05	0.000188893	0	0	0.000326286	0.000125343	0	0	0.000315282	0.00128621	0	0.000113892	0.000317013	7.13861e-05	0	0	2.65922e-05	0	0	0	3.13745e-05	0.00159509	0	0	6.40601e-05	8.12717e-05	0	0
Firmicutes	Clostridia	Clostridiales	Order_Clostridiales	Order_Clostridiales	Order_Clostridiales	ASV_0208	0	0.000999243	0.000541846	9.93006e-05	0	1.17829e-05	2.62134e-05	0	0	0	0	2.2416e-05	0	0.000807518	0.000355543	0.000185587	0	5.14885e-05	0	8.15716e-05	0	1.994e-05	1.1457e-05	2.52226e-05	0	0.00116144	0.000488106	0.000223083	0	3.48242e-05	1.27463e-05	0	0	1.4281e-05	1.36053e-05	0	0	0.000788256	0.000448477	0.000149474	0	0	0
Firmicutes	Clostridia	Clostridiales	Order_Clostridiales	Order_Clostridiales	Order_Clostridiales	ASV_0213	0	4.83504e-05	0.00136236	0	0	0	9.17467e-05	0	1.80897e-05	0	1.53032e-05	0	0	3.51095e-05	0.0012207	0	0	0	4.04296e-05	0	0	0	0	0	0	3.87147e-05	0.00143178	0	0	0	0.000127463	0	0	0	1.36053e-05	0	0	8.92366e-05	0.000845206	0	3.25087e-05	0	3.63152e-05
Firmicutes	Clostridia	Clostridiales	Order_Clostridiales	Order_Clostridiales	Order_Clostridiales	ASV_0233	0	0.000515738	0.000294145	0.000127672	0	0	1.31067e-05	1.14407e-05	0	0	1.53032e-05	0	0	0.000503236	0	0.000197186	0	0	0	8.15716e-05	0	0	0	2.52226e-05	0	0.000787198	0.000146432	0.000176118	0	0	1.27463e-05	0	0	1.4281e-05	0	0	0	0.000669274	0.000137993	0.00022421	0	0	0
Firmicutes	Clostridia	Clostridiales	Order_Clostridiales	Order_Clostridiales	Order_Clostridiales	ASV_0234	0	1.61168e-05	0	0	0	0	0	0	0.001411	0	1.53032e-05	0	0	4.68126e-05	0	0	0	0	0	0	0	0	0	0	0	2.58098e-05	0	0	2.37954e-05	0	0	0	0.00025921	0	0	0	0	1.48728e-05	0	0	0	0	0
Firmicutes	Clostridia	Clostridiales	Order_Clostridiales	Order_Clostridiales	Order_Clostridiales	ASV_0236	0	0	4.64439e-05	0.000255345	0	0	0	6.86444e-05	0	0	0	8.9664e-05	2.00874e-05	0	9.48114e-05	0.000255182	6.29644e-05	8.23817e-05	1.34765e-05	0.000407858	5.01373e-05	0.00010967	0	0.000529674	1.91972e-05	0	4.88106e-05	0.000598802	0	1.16081e-05	0	0.000172849	1.52476e-05	1.4281e-05	0	7.84363e-05	2.72665e-05	2.97455e-05	1.72491e-05	0.000330977	0	4.0705e-05	0
Firmicutes	Clostridia	Clostridiales	Order_Clostridiales	Order_Clostridiales	Order_Clostridiales	ASV_0259	0.000962248	0	3.09626e-05	1.41858e-05	4.02641e-05	0	1.31067e-05	0	3.61795e-05	0	0	0	0.000542359	0	1.18514e-05	0	5.24703e-05	0	0	1.35953e-05	7.52059e-05	0	0	3.78339e-05	0.000719894	0	1.62702e-05	2.34824e-05	2.37954e-05	0	0	1.32961e-05	0	0	0	0	0.000695297	0	0	2.13534e-05	4.8763e-05	0	0
Firmicutes	Clostridia	Clostridiales	Order_Clostridiales	Order_Clostridiales	Order_Clostridiales	ASV_0268	0.00090879	0	0	4.25574e-05	2.01321e-05	0	0	1.14407e-05	0	0	0	0	0.000321398	0	1.18514e-05	0	0	0	0	2.71905e-05	0	0	0	0	0.000623908	0	1.62702e-05	3.52237e-05	0	0	0	0	3.04952e-05	0	0	0	0.000368098	0	0	2.13534e-05	1.62543e-05	0	0
Firmicutes	Clostridia	Clostridiales	Order_Clostridiales	Order_Clostridiales	Order_Clostridiales	ASV_0288	0.00084464	0	0	0	4.02641e-05	0	0	0	0	0	0	0	0.000391704	0	0	0	0	0	0	0	0	0	0	0	0.000825478	0	0	0	0	0	0	0	1.52476e-05	0	0	0	9.54329e-05	0	0	0	1.62543e-05	0	0
Firmicutes	Clostridia	Clostridiales	Order_Clostridiales	Order_Clostridiales	Order_Clostridiales	ASV_0318	0	0	0.000851472	0	0	0	0	0	0	0	0	0	0	0	0.000189623	0	0	0	0	0	0	0	0	0	0	0	0.00112264	0	0	0	0	0	0	0	0	0	0	0	0.000206989	0	0	0	2.42101e-05
Firmicutes	Clostridia	Clostridiales	Order_Clostridiales	Order_Clostridiales	Order_Clostridiales	ASV_0329	0	0	0.000495402	1.41858e-05	0	0	0	0	0	0	0	0	0	0	0.00024888	0	0	0	0	0	0	0	2.2914e-05	2.52226e-05	0	0	0.000699619	4.69649e-05	0	0	0	0	0	0	0	0	0	0	0.000172491	1.06767e-05	0	0	0
Firmicutes	Clostridia	Clostridiales	Order_Clostridiales	Order_Clostridiales	Order_Clostridiales	ASV_0337	0.000427666	0	0	0	4.02641e-05	0	0	0	0	0	0	0	0.000261136	0	0	0	2.09881e-05	0	0	0	7.52059e-05	0	0	0	0.000326352	0	0	1.17412e-05	0	0	0	0	0	0	0	0	0.000231766	0	0	0	6.50174e-05	0	0
Firmicutes	Clostridia	Clostridiales	Order_Clostridiales	Order_Clostridiales	Order_Clostridiales	ASV_0340	0	0	0	0	0	0	0	0	0	0	0	0	0	0	0	0	0	0	0	0	0	0	0	0	0	0	0	0	0	0	0	0	0	0	0	0	0	0	0	0	0	0	0
Firmicutes	Clostridia	Clostridiales	Order_Clostridiales	Order_Clostridiales	Order_Clostridiales	ASV_0343	0	0	0.000325108	0	0	0	0	0	0	0	0	0	0	0	0.000308137	0	0	0	1.34765e-05	0	0	0	6.87419e-05	0	0	0	0.000374215	0	0	0	0	0	0	0	0	0	0	0	0.000293235	0	0	0	1.21051e-05
Firmicutes	Clostridia	Clostridiales	Order_Clostridiales	Order_Clostridiales	Order_Clostridiales	ASV_0348	0	0	0	0.000113486	0	0	0	1.14407e-05	0	0	0	2.2416e-05	0	0	0	0.00013919	0	0	0	0.000135953	0	0	0	2.52226e-05	0	0	0	0.000634026	0	0	0	0	0	0	0	0	0	0	0	0.000106767	0	0	0
Firmicutes	Clostridia	Clostridiales	Order_Clostridiales	Order_Clostridiales	Order_Clostridiales	ASV_0360	0.000149683	0	0.000123851	0	8.05283e-05	0	0	0	0	0	0	0	8.03495e-05	0	8.296e-05	0	2.09881e-05	0	0	0	0	0	1.1457e-05	0	0.000124782	0	0.000146432	0	0	0	1.27463e-05	0	0	0	0	0	4.08998e-05	0	8.62456e-05	0	1.62543e-05	0	0
Firmicutes	Clostridia	Clostridiales	Order_Clostridiales	Order_Clostridiales	Order_Clostridiales	ASV_0367	0	0	4.64439e-05	0.000141858	0	0	0	3.43222e-05	0	0	0	0	0	0	1.18514e-05	4.63967e-05	0	0	0	8.15716e-05	0	0	0	5.04452e-05	0	0	3.25404e-05	0.000399202	0	0	0	0	0	0	0	0	0	0	3.44982e-05	5.33834e-05	0	0	0
Firmicutes	Clostridia	Clostridiales	Order_Clostridiales	Order_Clostridiales	Order_Clostridiales	ASV_0375	0.000203141	0	0	0	2.01321e-05	0	0	0	0	0	0	0	0.000210917	0	0	0	0	0	0	2.71905e-05	0	0	0	2.52226e-05	0.000124782	0	0	0	0	0	0	0	0	0	0	0	0.000163599	0	0	2.13534e-05	1.62543e-05	0	0
Firmicutes	Clostridia	Clostridiales	Order_Clostridiales	Order_Clostridiales	Order_Clostridiales	ASV_0387	0	0.00035457	0	0	0	0	0	0	0	0	0	0	0	0.000140438	0	0	0	0	0	0	0	0	0	0	0	0.000296812	0	0	0	0	0	0	0	0	0	0	0	5.94911e-05	0	0	0	1.01763e-05	0
Firmicutes	Clostridia	Clostridiales	Order_Clostridiales	Order_Clostridiales	Order_Clostridiales	ASV_0395	0	0	0.000201257	1.41858e-05	0	0	1.31067e-05	0	0	0	0	0	0	0	3.55543e-05	2.31984e-05	0	0	0	1.35953e-05	0	0	0	2.52226e-05	0	0	0.000260323	2.34824e-05	0	0	0	0	0	0	0	0	0	0	0.000120744	3.20301e-05	0	0	0
Firmicutes	Clostridia	Clostridiales	Order_Clostridiales	Order_Clostridiales	Order_Clostridiales	ASV_0398	0	0	0	7.0929e-05	0	0	0	2.28815e-05	0	0	0	0	0	0	0	4.63967e-05	0	0	0	0.000122357	0	0	0	0.000151336	0	0	0	0.000363978	0	0	0	2.65922e-05	0	0	0	0	0	0	0	3.20301e-05	0	0	0
Firmicutes	Clostridia	Clostridiales	Order_Clostridiales	Order_Clostridiales	Order_Clostridiales	ASV_0411	0	0	0	0.000113486	0	0	0	0	0	0	0	0	1.00437e-05	0	0	5.79959e-05	0	0	0	0.000108762	0	0	0	0.000113502	0	0	0	0.000152636	0	0	0	0	0	0	0	0	0	0	0	9.60902e-05	0	0	0
Firmicutes	Clostridia	Clostridiales	Order_Clostridiales	Order_Clostridiales	Order_Clostridiales	ASV_0416	0	0	0	0	0	0	0	0	0	0	0	0	1.00437e-05	0	0	0	0	0	0	0	0	0	0	0	0	0	0	0	0	0	0	0	0	0	0	0	0	0	0	0	0	0	0
Firmicutes	Clostridia	Clostridiales	Order_Clostridiales	Order_Clostridiales	Order_Clostridiales	ASV_0434	0	0	1.54813e-05	2.83716e-05	0	0	0	0	0	0	0	0	0	0	1.18514e-05	3.47975e-05	0	0	0	9.51669e-05	0	0	0	2.52226e-05	0	0	1.62702e-05	8.21886e-05	0	0	0	1.32961e-05	0	0	0	0	0	0	3.44982e-05	5.33834e-05	0	0	0
Firmicutes	Clostridia	Clostridiales	Order_Clostridiales	Order_Clostridiales	Order_Clostridiales	ASV_0444	0	0	0	1.41858e-05	2.01321e-05	0	0	0	0	0	0	0	0	0	0	1.15992e-05	0	0	0	1.35953e-05	0	0	0	7.56678e-05	0	0	0	4.69649e-05	0	0	0	1.32961e-05	0	0	0	1.56873e-05	0	0	0	2.13534e-05	0	0	0
Firmicutes	Clostridia	Clostridiales	Order_Clostridiales	Order_Clostridiales	Order_Clostridiales	ASV_0446	0	0	9.28879e-05	0	0	0	0	0	0	0	1.53032e-05	0	0	0	0.000106663	0	0	0	0	0	0	0	2.2914e-05	0	0	0	0.000146432	0	0	0	0	0	0	0	0	0	0	0	5.17473e-05	0	0	0	0
Firmicutes	Clostridia	Clostridiales	Order_Clostridiales	Order_Clostridiales	Order_Clostridiales	ASV_0448	0.000138991	0	0	0	0	0	0	0	0	0	0	0	6.02621e-05	0	0	0	1.04941e-05	0	0	0	0	0	0	0	3.83943e-05	0	0	0	0	0	0	0	0	0	0	0	6.81663e-05	0	0	0	0	0	0
Firmicutes	Clostridia	Clostridiales	Order_Clostridiales	Order_Clostridiales	Order_Clostridiales	ASV_0461	0	0	0	0	0	0	0	0	0	0	0	0	0	0	0	0	0	0	0	0	0	0	0	0	0	0	0	0	0	0	0	0	0	0	0	0	0	0	0	0	0	0	0
Firmicutes	Clostridia	Clostridiales	Order_Clostridiales	Order_Clostridiales	Order_Clostridiales	ASV_0465	0	0	3.09626e-05	0	0	0	1.31067e-05	0	0	0	0	0	0	0	9.48114e-05	0	0	0	0	0	0	0	0	0	0	0	0.000227783	0	0	0	0	0	0	0	0	0	0	0	6.89964e-05	0	0	0	0
Firmicutes	Clostridia	Clostridiales	Order_Clostridiales	Order_Clostridiales	Order_Clostridiales	ASV_0473	0	0	0	4.25574e-05	0	0	0	0	0	0	0	0	0	0	1.18514e-05	0	0	0	0	0	0	0	0	2.52226e-05	0	0	0	0.000152636	0	0	0	0	0	0	0	0	0	0	0	5.33834e-05	0	0	0
Firmicutes	Clostridia	Clostridiales	Order_Clostridiales	Order_Clostridiales	Order_Clostridiales	ASV_0486	0	3.22336e-05	0	0	0	0	0	0	0	0	0	0	0	1.17032e-05	0	0	0	0	0	0	0	0	0	0	0	5.16196e-05	0	0	0	0	0	0	0	2.8562e-05	0	0	0	7.43638e-05	0	0	0	0	0
Firmicutes	Clostridia	Clostridiales	Order_Clostridiales	Order_Clostridiales	Order_Clostridiales	ASV_0489	0	3.22336e-05	0	0	0	0	0	0	0	0	0	0	0	4.68126e-05	0	0	0	0	0	2.71905e-05	0	0	0	0	0	1.29049e-05	0	1.17412e-05	0	0	0	0	0	0	0	0	0	7.43638e-05	0	0	0	0	0
Firmicutes	Clostridia	Clostridiales	Order_Clostridiales	Order_Clostridiales	Order_Clostridiales	ASV_0497	1.06916e-05	0	6.19253e-05	1.41858e-05	0	0	0	0	0	0	0	0	1.00437e-05	0	0	0	0	0	0	4.07858e-05	0	0	0	1.26113e-05	0	0	6.50809e-05	1.17412e-05	0	0	0	0	0	0	0	0	0	0	0	0	0	0	0
Firmicutes	Clostridia	Clostridiales	Order_Clostridiales	Order_Clostridiales	Order_Clostridiales	ASV_0505	0	0	6.19253e-05	0	0	0	0	0	0	0	0	0	0	0	2.37029e-05	0	0	0	0	0	0	0	0	1.26113e-05	0	0	6.50809e-05	1.17412e-05	0	0	0	0	0	0	0	0	0	0	1.72491e-05	0	0	0	0
Firmicutes	Clostridia	Clostridiales	Peptoniphilaceae	Finegoldia	magna	ASV_0153	2.13833e-05	0	0	0	0.00102674	1.17829e-05	2.62134e-05	0.00016017	0.000307525	0.000130406	0	0.000156912	3.01311e-05	2.34063e-05	2.37029e-05	0	1.04941e-05	1.02977e-05	0	0	5.01373e-05	0.00618139	2.2914e-05	0	2.87958e-05	0	0	0	4.75907e-05	0	0	0	9.14857e-05	0.000314182	0	0	1.36333e-05	0	0	0	0.000666428	4.0705e-05	0
Firmicutes	Clostridia	Clostridiales	Peptoniphilaceae	Murdochiella	asaccharolytica	ASV_0515	0	0	0	0	0	0	0	0	0	0	0	0	0	0	0	0	0	0	0	0	0	1.994e-05	0	0	1.91972e-05	0	0	1.17412e-05	0	1.16081e-05	0	0	0	0	0	0	1.36333e-05	0	0	0	0	0	0
Firmicutes	Clostridia	Clostridiales	Peptoniphilaceae	Peptoniphilus	Genus_Peptoniphilus	ASV_0077	0	0	1.54813e-05	0	0	1.17829e-05	0	4.57629e-05	0	0	0	0.0021071	3.01311e-05	0	0	1.15992e-05	0	0	0	0	0	0	0	0	0	2.58098e-05	0	0	0	0	0	0	0	4.28431e-05	0	1.56873e-05	0	0	0	1.06767e-05	3.25087e-05	1.01763e-05	1.21051e-05
Firmicutes	Clostridia	Clostridiales	Peptoniphilaceae	Peptoniphilus	Genus_Peptoniphilus	ASV_0251	0	0	0	0	0	0	1.31067e-05	0	0	0	0	0	0	0	0	0	0	0	0	0	0	0	0	0	0	0	0	0	0	0	0	0	0	0	0	0	0	0	0	0	0	0	0
Firmicutes	Clostridia	Clostridiales	Peptoniphilaceae	Peptoniphilus	coxii	ASV_0458	0	0	0	0	0	0	0	0	0	0	0	0	0	0	0	0	0	0	0	0	0	0	0	0	0	3.87147e-05	0	0	0	0	0	0	0	0	0	0	0	1.48728e-05	1.72491e-05	0	0	0	0
Firmicutes	Clostridia	Clostridiales	Peptoniphilaceae	Peptoniphilus	senegalensis/tyrrelliae	ASV_0173	0	1.61168e-05	0	0	0	0	0	0	0	0	0	0	0	2.34063e-05	0	0	0	0	0	0	0	0	0	0	0	0	0	0	0	0	0	0	0	0	0	0	0	2.97455e-05	0	0	0	0	0
Firmicutes	Clostridia	Clostridiales	Peptostreptococcaceae	Family_Peptostreptococcaceae	Family_Peptostreptococcaceae	ASV_0176	0	0	0.000325108	0.000141858	0.000120792	0	0.00043252	0	0	0	1.53032e-05	0	4.01748e-05	0	0.0012207	6.95951e-05	7.34584e-05	1.02977e-05	0.00203496	1.35953e-05	5.01373e-05	5.98199e-05	0.00143212	3.78339e-05	9.59859e-06	0	0.000211513	1.17412e-05	0	0	0.00024218	0	0	0	5.4421e-05	0	0	0	0.000551972	0.00016015	0	0.000122115	4.84203e-05
Firmicutes	Clostridia	Clostridiales	Peptostreptococcaceae	Family_Peptostreptococcaceae	Family_Peptostreptococcaceae	ASV_0264	0	0	0.000170294	8.51148e-05	0	0	0.00011796	1.14407e-05	0	0	0	0	1.00437e-05	1.17032e-05	0.000438503	4.63967e-05	5.24703e-05	1.02977e-05	0.000579491	0	1.25343e-05	3.988e-05	0.000366624	1.26113e-05	1.91972e-05	0	8.13511e-05	0	0	0	5.09853e-05	0	0	0	0	0	0	0	0.000172491	4.27068e-05	0	1.01763e-05	0
Firmicutes	Clostridia	Clostridiales	Peptostreptococcaceae	Family_Peptostreptococcaceae	Family_Peptostreptococcaceae	ASV_0391	0	0	0	0	2.01321e-05	1.17829e-05	7.86401e-05	0	0	0	1.53032e-05	0	0	0	0	0	6.29644e-05	0	0.000512109	0	1.25343e-05	3.988e-05	3.4371e-05	0	0	0	0	0	0	0	2.54926e-05	1.32961e-05	0	0	0	0	0	0	0	1.06767e-05	0	0	0
Firmicutes	Clostridia	Clostridiales	Peptostreptococcaceae	Family_Peptostreptococcaceae	Family_Peptostreptococcaceae	ASV_0399	0	0	0	0	2.01321e-05	1.17829e-05	0.000144173	1.14407e-05	0	0	6.12126e-05	0	0	0	0	0	0	0	1.34765e-05	0	0	0	0	0	0	0	0	0	0	0	5.09853e-05	0	0	0	4.08158e-05	0	0	0	0	0	0	5.08813e-05	6.05254e-05
Firmicutes	Clostridia	Clostridiales	Peptostreptococcaceae	Peptostreptococcus	anaerobius	ASV_0083	2.13833e-05	4.83504e-05	0	1.41858e-05	0	0	0	0	0	0	0	0	4.01748e-05	4.68126e-05	0	0	1.04941e-05	0	0	0	0	0	0	0	1.91972e-05	2.58098e-05	1.62702e-05	0	0	0	0	0	0	0	0	0	1.36333e-05	4.46183e-05	0	0	0	1.01763e-05	0
Firmicutes	Clostridia	Clostridiales	Peptostreptococcaceae	Romboutsia	Genus_Romboutsia	ASV_0006	0.00439427	0.00285268	0.0833204	0.00933426	0.0701603	0.00716398	0.168001	0.00520553	0.00909913	0.013258	0.0787347	0.0122167	0.0136293	0.00354606	0.102313	0.00857179	0.0165701	0.000308931	0.278479	0.00334444	0.0136123	0.0138184	0.185328	0.00311499	0.00684379	0.0028907	0.0936351	0.00260655	0.00030934	0.00190372	0.228796	0.000252626	7.62381e-05	0.00241349	0.0376866	0.00688671	0.00830266	0.00337612	0.0865905	0.0147125	0.000682683	0.0273232	0.0174434
Firmicutes	Clostridia	Clostridiales	Peptostreptococcaceae	Romboutsia	Genus_Romboutsia	ASV_0255	9.62248e-05	0	0.000278664	0	0	0	0.00011796	1.14407e-05	0	0	3.06063e-05	0	0.000220961	0	0.000367394	2.31984e-05	2.09881e-05	0	4.04296e-05	0	0	0	5.72849e-05	0	0.00013438	0	0.000406755	0	0	0	5.09853e-05	0	0	0	0	0	0.000204499	0	0.000206989	0	0	2.03525e-05	1.21051e-05
Firmicutes	Clostridia	Clostridiales	Peptostreptococcaceae	Romboutsia	Genus_Romboutsia	ASV_0281	0	0	0.000448958	5.67432e-05	0	0	0.000104853	4.57629e-05	0	0	3.06063e-05	0	0	5.85158e-05	0.000402949	4.63967e-05	0	0	6.73827e-05	5.43811e-05	0	0	4.58279e-05	1.26113e-05	0	1.29049e-05	0.000390485	1.17412e-05	0	1.16081e-05	3.8239e-05	0	0	0	1.36053e-05	0	0	0	0.000344982	0.000149474	0	0	0
Firmicutes	Clostridia	Clostridiales	Peptostreptococcaceae	Romboutsia	Genus_Romboutsia	ASV_0320	0	0	0	0.000127672	0	0	1.31067e-05	0	0	0	0	2.2416e-05	1.00437e-05	0	0	0.000104393	0.000808043	0	4.04296e-05	0	0.000476304	0	2.2914e-05	3.78339e-05	0	0	0	4.69649e-05	0	0	0	0	0	0	0	3.13745e-05	0	1.48728e-05	0	0.000149474	0	0	0
Firmicutes	Clostridia	Clostridiales	Peptostreptococcaceae	Romboutsia	Genus_Romboutsia	ASV_0371	0	0	0	0	2.01321e-05	0	5.24267e-05	1.14407e-05	0	0	4.59095e-05	0	0	0	5.92572e-05	0	2.09881e-05	0	0.000215625	0	0	0	8.01989e-05	0	1.91972e-05	0	4.88106e-05	0	0	0	8.92243e-05	0	0	0	0	0	0	0	1.72491e-05	1.06767e-05	0	2.03525e-05	0
Firmicutes	Clostridia	Clostridiales	Peptostreptococcaceae	Romboutsia	Genus_Romboutsia	ASV_0407	0	0	4.64439e-05	1.41858e-05	4.02641e-05	1.17829e-05	7.86401e-05	1.14407e-05	0	0	1.53032e-05	0	0	0	2.37029e-05	0	0	0	5.39062e-05	0	1.25343e-05	0	4.58279e-05	0	0	0	4.88106e-05	0	0	0	8.92243e-05	0	0	0	1.36053e-05	0	1.36333e-05	0	5.17473e-05	1.06767e-05	0	1.01763e-05	1.21051e-05
Firmicutes	Clostridia	Clostridiales	Peptostreptococcaceae	Terrisporobacter	Genus_Terrisporobacter	ASV_0134	0	0	0	0	0	0	0	0	0	0	0	0	1.00437e-05	0	1.18514e-05	1.15992e-05	0	0	0	0	0	0	0	0	0	0	9.76213e-05	0	0	0.000580403	0.00014021	0	0	0	0.000625842	0	0	0.0001636	0	0	0	0.0177779	0.000714199
Firmicutes	Clostridia	Clostridiales	Ruminococcaceae	Acetanaerobacterium	Genus_Acetanaerobacterium	ASV_0426	0	0	4.64439e-05	2.83716e-05	0	0	0	0	0	0	0	0	0	0	1.18514e-05	1.15992e-05	0	0	0	2.71905e-05	0	0	0	1.26113e-05	0	0	4.88106e-05	4.69649e-05	0	0	0	0	0	0	0	0	0	0	0	3.20301e-05	0	0	0
Firmicutes	Clostridia	Clostridiales	Ruminococcaceae	Agathobaculum	Genus_Agathobaculum	ASV_0111	0	6.44673e-05	3.09626e-05	0.000581618	0	0.00194417	0.00132377	0.00141865	0	0.000434688	0.00131607	0.00141221	1.00437e-05	1.17032e-05	0	0.00041757	0	0	0	0.00077493	0	0	0	0.000416173	9.59859e-06	0	1.62702e-05	0.00163203	0	5.80403e-05	0.000395136	0.00236671	0	8.56861e-05	0.00240813	0.00188247	0	2.97455e-05	1.72491e-05	0.000427068	0	0.000539341	0.000278417
Firmicutes	Clostridia	Clostridiales	Ruminococcaceae	Agathobaculum	Genus_Agathobaculum	ASV_0117	0	0	0	0.000113486	0	0.0004124	0.00287036	0.000137289	0	4.34688e-05	0.00238729	0.00011208	0	0	1.18514e-05	3.47975e-05	0	2.05954e-05	0	5.43811e-05	0	0	0	7.56678e-05	0	2.58098e-05	0	0.000234824	0	2.32161e-05	0.000879496	0.000319107	0	0	0.00480266	0	0	0	0	7.47368e-05	0	3.05288e-05	0.00131945
Firmicutes	Clostridia	Clostridiales	Ruminococcaceae	Anaerobacterium	Genus_Anaerobacterium	ASV_0463	0	0	0	0	0	0	0	0	0	0	0	0	0	0	0	0	0	0	0	0	0	0	0	0	0	0	0	0	0	0	0	0	0	0	0	0	0	0	0	0	0	0	0
Firmicutes	Clostridia	Clostridiales	Ruminococcaceae	Anaerofilum	Genus_Anaerofilum	ASV_0370	0	0	0	0	0	0	0	0	0	0	0	0	0	0	0	0	0	0	0	1.35953e-05	0	0	0	0	0	0	0	0	0	0	0	0	0	0	0	0	0	0	0	0	0	0	0
Firmicutes	Clostridia	Clostridiales	Ruminococcaceae	Anaerotruncus	Genus_Anaerotruncus	ASV_0424	0	0	0	0	0	0	0	0	0	0	0	0	0	0	0	0	0	0	0	0	0	0	0	0	0	0	0	0	0	0	0	0	0	0	0	0	0	0	0	0	0	0	0
Firmicutes	Clostridia	Clostridiales	Ruminococcaceae	Anaerotruncus	colihominis	ASV_0409	0	0	0	0	0	0	0	0	5.42692e-05	0	0	0	0	0	0	0	0	0	0	0	0	0	0	0	0	0	0	0	0	0	0	0	0	0	0	0	0	0	0	0	0	0	0
Firmicutes	Clostridia	Clostridiales	Ruminococcaceae	Butyricicoccus	Genus_Butyricicoccus	ASV_0230	0	0	0.000805028	0	0	0	0.000170387	0	0	0	0	0	0	0	0.000770343	0	0	0	0	0	0	0	0	0	0	0	0.000455566	0	0	0	0	0	0	0	9.52368e-05	0	0	0	0.000413979	0	1.62543e-05	0	8.47355e-05
Firmicutes	Clostridia	Clostridiales	Ruminococcaceae	Caproicibacter	Genus_Caproicibacter	ASV_0466	0	0	0	0	0	0	0	0	0	0	0	0	0	0	0	0	0	0	0	0	0	9.96999e-06	0	0	0	0	0	0	0	0	0	0	0	0	0	0	0	0	0	0	0	0	0
Firmicutes	Clostridia	Clostridiales	Ruminococcaceae	Clostridium_IV	Genus_Clostridium_IV	ASV_0194	0	3.22336e-05	0	1.41858e-05	0	0	0	0	0.000452243	0	0	2.2416e-05	2.00874e-05	1.17032e-05	0	0	2.09881e-05	0	0	4.07858e-05	3.76029e-05	0	0	2.52226e-05	2.87958e-05	0	0	0.000211342	0	0	0	0	0	0	0	0	2.72665e-05	2.97455e-05	0	0	0	0	0
Firmicutes	Clostridia	Clostridiales	Ruminococcaceae	Colidextribacter	Genus_Colidextribacter	ASV_0227	0.000288674	0	0.00185776	0	0	0	0	0	0	0	0	0	0.000200874	0	0.000971817	0	1.04941e-05	0	0	0	1.25343e-05	0	0	0	0.000143979	0	0.00125281	0	2.37954e-05	0	0	0	0	0	0	0	0.000340832	0	0.000879705	0	3.25087e-05	0	0
Firmicutes	Clostridia	Clostridiales	Ruminococcaceae	Colidextribacter	Genus_Colidextribacter	ASV_0253	4.27666e-05	8.05841e-05	6.19253e-05	8.51148e-05	0	0	1.31067e-05	6.86444e-05	7.23589e-05	0	6.12126e-05	0.00011208	5.02185e-05	0.000163844	0	3.47975e-05	1.04941e-05	0	0	0.000353477	1.25343e-05	0	0	0.000151336	6.71901e-05	0.000141954	9.76213e-05	0.000446166	0	0	0.00014021	3.98883e-05	0	0	8.16315e-05	0.000188247	1.36333e-05	0.00026771	1.72491e-05	8.54135e-05	1.62543e-05	2.03525e-05	2.42101e-05
Firmicutes	Clostridia	Clostridiales	Ruminococcaceae	Dysosmobacter	Genus_Dysosmobacter	ASV_0080	2.13833e-05	0	0	5.67432e-05	0.00138911	0	0	4.57629e-05	0.00557164	0.00234732	0	0.0005604	1.00437e-05	0	0	3.47975e-05	0	0	1.34765e-05	4.07858e-05	0	0	0	2.52226e-05	2.87958e-05	2.58098e-05	0	2.34824e-05	0.000380726	0	0	0	0.0106276	0.00175657	0	0.000454931	2.72665e-05	0	1.72491e-05	3.20301e-05	0.000471376	2.03525e-05	0
Firmicutes	Clostridia	Clostridiales	Ruminococcaceae	Dysosmobacter	Genus_Dysosmobacter	ASV_0152	0	0	0	1.41858e-05	2.01321e-05	0	0	0	0.000434153	0.00239078	0	0.0005604	3.01311e-05	2.34063e-05	0	0	2.09881e-05	0	0	0	0	0	0	0	9.59859e-06	0	0	0	0	0	0	0	0.00141803	0.00324179	2.72105e-05	0.000203934	1.36333e-05	1.48728e-05	0	0	0	0	0
Firmicutes	Clostridia	Clostridiales	Ruminococcaceae	Dysosmobacter	Genus_Dysosmobacter	ASV_0299	0	0	0	0	0	0	0	0	0	0	0	0.00255542	0	0	0	0	0	0	0	0	0	0	0	0	0	0	0	0	0	0	0	0	0	0	0	0.00122361	0	0	0	0	0	0	0
Firmicutes	Clostridia	Clostridiales	Ruminococcaceae	Faecalibacterium	Genus_Faecalibacterium	ASV_0205	0	0	0	0.00060999	0	8.24801e-05	6.55334e-05	0.000125848	0	0	0	2.2416e-05	0	0	0	0.000661153	0	0	0	0.000856502	0	0	0	0.000933236	0	0	0	0.00258307	0	2.32161e-05	2.54926e-05	6.64805e-05	0	0	0	0	0	0	0	0.000448421	0	0	0
Firmicutes	Clostridia	Clostridiales	Ruminococcaceae	Faecalibacterium	prausnitzii	ASV_0028	0.000577349	0.00212742	0.000743103	0.0274921	0.00366404	0.00558508	0.00062912	0.00995344	0.000578871	0.00343404	0.000214244	0.000919056	0.00107467	0.00134586	0.000438503	0.017364	3.14822e-05	4.11908e-05	6.73827e-05	0.0247434	2.50686e-05	0.00809563	1.1457e-05	0.0241885	0.000518324	0.00245193	0.00078097	0.0663379	0.00737656	0.000812565	0.000764779	0.0117405	9.14857e-05	0.00539823	0.00197276	0.0023374	0.000504431	0.00187397	0.00037948	0.0194422	0.000406359	0.000295111	3.63152e-05
Firmicutes	Clostridia	Clostridiales	Ruminococcaceae	Faecalibacterium	prausnitzii	ASV_0099	0	0.000467388	0.00023222	0.00212787	0.00010066	0.000212092	0.000209707	0.00318052	0	0	0.000413185	0.00011208	1.00437e-05	0.000292579	0.000118514	0.000951133	0	0	1.34765e-05	0.00240636	0	9.96999e-06	0.000103113	0.00142508	0	0.000348432	0.000406755	0.00703299	0	1.16081e-05	6.37316e-05	0.00498604	0	0	0.000231289	0.00150598	0	0.000594911	0.000172491	0.00135594	1.62543e-05	2.03525e-05	0.000133156
Firmicutes	Clostridia	Clostridiales	Ruminococcaceae	Family_Ruminococcaceae	Family_Ruminococcaceae	ASV_0025	0.0684372	0.000145051	0.000185776	0.00043976	0.00336206	0.000129612	0.000380094	0.000137289	0.00814038	0.000260813	0.000168335	0	0.0784613	8.19221e-05	5.92572e-05	0.000185587	0.00747177	0.000144168	1.34765e-05	0.000271905	0.0144145	5.98199e-05	4.58279e-05	0.000163947	0.0647905	9.03342e-05	0.000130162	0.000258307	0.00649613	1.16081e-05	0.000203941	0.000159553	0.00158575	0.000171372	0.000326526	0.000125498	0.0728153	0.000237964	0.000137993	0.000117444	0.00775332	3.05288e-05	4.84203e-05
Firmicutes	Clostridia	Clostridiales	Ruminococcaceae	Family_Ruminococcaceae	Family_Ruminococcaceae	ASV_0066	0	0.000209519	0.00151717	0.000822777	0	1.17829e-05	1.31067e-05	4.57629e-05	3.61795e-05	4.34688e-05	1.53032e-05	0.00022416	3.01311e-05	0.000245766	0.0008296	0.000661153	0	4.11908e-05	2.69531e-05	0.00197131	0	0	1.1457e-05	0.00190431	3.83943e-05	0.000296812	0.0016921	0.0047552	0	0	1.27463e-05	0.000212738	0	4.28431e-05	0	0.000125498	0	0.000297455	0.000431228	0.000704661	0	2.03525e-05	1.21051e-05
Firmicutes	Clostridia	Clostridiales	Ruminococcaceae	Family_Ruminococcaceae	Family_Ruminococcaceae	ASV_0114	0	0.00104759	0	0.000652547	0	0	0	9.15259e-05	3.61795e-05	0	0.000122425	8.9664e-05	3.01311e-05	0.000795815	0	0.000719149	0	0	0	0.000557406	0	0	0	0.000353116	0	0.000967867	0	0.00144417	0	0	0	5.31844e-05	0	0	1.36053e-05	4.70618e-05	0	0.00120469	0	0.000640601	0	0	0
Firmicutes	Clostridia	Clostridiales	Ruminococcaceae	Family_Ruminococcaceae	Family_Ruminococcaceae	ASV_0119	0	0	0	0	0	0	1.31067e-05	0.000514833	0	0	0	0.0115891	0	0	0	1.15992e-05	0	2.05954e-05	0	2.71905e-05	0	0	0	0	9.59859e-06	0	6.50809e-05	3.52237e-05	0	0	0	0.000452068	0	0	0	0.0154049	0	0	0	2.13534e-05	0	0	0
Firmicutes	Clostridia	Clostridiales	Ruminococcaceae	Family_Ruminococcaceae	Family_Ruminococcaceae	ASV_0157	0	0	0	8.51148e-05	0	0	1.31067e-05	1.14407e-05	0	0	0.000183638	0.000179328	1.00437e-05	0	0	9.27934e-05	0	0	1.34765e-05	0.000285501	0	0	0	0.00010089	0	0	3.25404e-05	0.000528355	0	0	1.27463e-05	1.32961e-05	0	0	9.52368e-05	0.00145892	0	0	0	6.40601e-05	0	0	0
Firmicutes	Clostridia	Clostridiales	Ruminococcaceae	Family_Ruminococcaceae	Family_Ruminococcaceae	ASV_0180	0	0	0.00035607	0	0	0	0.000366987	0	0	0	0.0024332	0	0	0	0.000177771	0	0	0	2.69531e-05	0	0	0	3.4371e-05	0	0	0	0.000276594	0	0	0	0.000280419	0	0	0	0.0012925	0	0	0	0.000155242	0	0	0	0.000157366
Firmicutes	Clostridia	Clostridiales	Ruminococcaceae	Family_Ruminococcaceae	Family_Ruminococcaceae	ASV_0182	0	0	0	1.41858e-05	0	0	0.00011796	1.14407e-05	0	0	0.00082637	0	0	0	1.18514e-05	4.63967e-05	0	0	0	0.000122357	0	0	0	0.00010089	0	0	3.25404e-05	0.000293531	0	0	0	0	0	0	0.000721079	1.56873e-05	0	0	0	4.27068e-05	0	0	9.68406e-05
Firmicutes	Clostridia	Clostridiales	Ruminococcaceae	Family_Ruminococcaceae	Family_Ruminococcaceae	ASV_0202	0	0	0.000139332	0.000198601	0	0	1.31067e-05	1.14407e-05	0	0	4.59095e-05	0.000829392	1.00437e-05	0	4.74057e-05	0.000115992	0	0	0	0.000367072	0	0	0	7.56678e-05	0	0	0.000178972	0.000258307	0	0	1.27463e-05	1.32961e-05	0	0	2.72105e-05	0.00138048	0	0	3.44982e-05	0.00016015	0	0	2.42101e-05
Firmicutes	Clostridia	Clostridiales	Ruminococcaceae	Family_Ruminococcaceae	Family_Ruminococcaceae	ASV_0229	7.48415e-05	0.00101536	1.54813e-05	2.83716e-05	6.03962e-05	4.71315e-05	0	0	0	4.34688e-05	0	2.2416e-05	8.03495e-05	0.000655377	3.55543e-05	4.63967e-05	1.04941e-05	7.20839e-05	0	8.15716e-05	2.50686e-05	2.991e-05	0	3.78339e-05	8.63873e-05	0.00154859	8.13511e-05	0.000246566	0	4.64323e-05	0	0	0	1.4281e-05	0	0	6.81663e-05	0.00107084	0	3.20301e-05	1.62543e-05	2.03525e-05	0
Firmicutes	Clostridia	Clostridiales	Ruminococcaceae	Family_Ruminococcaceae	Family_Ruminococcaceae	ASV_0231	0.00129369	0	0	0	0.00010066	0	0	0	9.04486e-05	0	0	0	0.000522272	0	0	0	0.000367292	0	0	0	0.000300824	0	0	0	0.000902267	0	0	0	2.37954e-05	0	0	0	1.52476e-05	0	0	0	0.000817996	0	0	0	1.62543e-05	0	0
Firmicutes	Clostridia	Clostridiales	Ruminococcaceae	Family_Ruminococcaceae	Family_Ruminococcaceae	ASV_0238	0	6.44673e-05	6.19253e-05	4.25574e-05	0	0	0	2.28815e-05	0	0	0	0	2.00874e-05	4.68126e-05	1.18514e-05	0.000104393	0	1.02977e-05	0	0.000244715	0	0	0	0.000365728	0	7.74293e-05	6.50809e-05	0.00140895	0	0	0	2.65922e-05	0	0	0	1.56873e-05	0	7.43638e-05	0	0.000234887	0	0	0
Firmicutes	Clostridia	Clostridiales	Ruminococcaceae	Family_Ruminococcaceae	Family_Ruminococcaceae	ASV_0241	0.000748415	0	0.000417995	0	4.02641e-05	0	0	0	0	0	0	0	0.000612665	0	0.000379246	0	7.34584e-05	0	0	0	0.000150412	0	0	0	0.000518324	0	0.000260323	0	0	0	0	0	0	0	1.36053e-05	0	0.00070893	0	0.000413979	0	0	0	0
Firmicutes	Clostridia	Clostridiales	Ruminococcaceae	Family_Ruminococcaceae	Family_Ruminococcaceae	ASV_0263	1.06916e-05	0	0	0	0	0	0	0	0.000361795	0	0	0	2.00874e-05	0	0	0	0	0	0	0	3.76029e-05	0	0	0	0	1.29049e-05	0	0	0	0	0	0	1.52476e-05	0	0	0	0	0	0	0	0	0	0
Firmicutes	Clostridia	Clostridiales	Ruminococcaceae	Family_Ruminococcaceae	Family_Ruminococcaceae	ASV_0265	0	0	3.09626e-05	0	0	0	0	0	0	0	0	2.2416e-05	0	0	0	1.15992e-05	0	0	1.34765e-05	0	0	0	0	0	0	2.58098e-05	0	0	0	0	0	0	0	0	0	0	0	0	1.72491e-05	0	0	0	0
Firmicutes	Clostridia	Clostridiales	Ruminococcaceae	Family_Ruminococcaceae	Family_Ruminococcaceae	ASV_0278	0	1.61168e-05	4.64439e-05	0.000198601	0	0	0	1.14407e-05	0	0	0	0	0	0	2.37029e-05	9.27934e-05	0	0	0	0.000312691	0	0	0	0.000315282	0	0	6.50809e-05	0.000528355	0	0	0	6.64805e-05	0	0	0	3.13745e-05	0	0	1.72491e-05	0.000106767	0	0	0
Firmicutes	Clostridia	Clostridiales	Ruminococcaceae	Family_Ruminococcaceae	Family_Ruminococcaceae	ASV_0282	0	0	0.000913398	0	0	0	0	0	0	0	1.53032e-05	0	0	0	0.000628126	0	0	0	1.34765e-05	0	0	0	3.4371e-05	0	0	0	0.000829781	0	0	0	3.8239e-05	0	0	0	1.36053e-05	0	0	0	0.000293235	0	0	0	4.84203e-05
Firmicutes	Clostridia	Clostridiales	Ruminococcaceae	Family_Ruminococcaceae	Family_Ruminococcaceae	ASV_0294	0.000459741	0	0	0	2.01321e-05	0	0	0	0	0	0	0	0.000532316	0	0	0	1.04941e-05	0	0	0	0	0	0	0	0.000470331	0	0	0	0	0	0	0	0	0	0	0	0.000531697	0	0	0	0	0	0
Firmicutes	Clostridia	Clostridiales	Ruminococcaceae	Family_Ruminococcaceae	Family_Ruminococcaceae	ASV_0308	0.000117608	0	0	4.25574e-05	0	0	0	2.28815e-05	0	0	0	4.4832e-05	0.000130568	0	0	5.79959e-05	0	0	0	0.000163143	3.76029e-05	0	0	2.52226e-05	9.59859e-05	0	0	0.000270048	0	0	0	0	0	0	0	0	0.000231766	0	0	0.000117444	0	0	0
Firmicutes	Clostridia	Clostridiales	Ruminococcaceae	Family_Ruminococcaceae	Family_Ruminococcaceae	ASV_0324	0	0.000177285	9.28879e-05	2.83716e-05	0	0	0	0	0	0	0	0	0	0.000210657	5.92572e-05	4.63967e-05	0	0	0	0.000163143	0	0	0	0.000277448	0	0.000206478	0.000113892	8.21886e-05	0	0	0	0	0	0	1.36053e-05	0	0	0.000118982	5.17473e-05	2.13534e-05	0	0	0
Firmicutes	Clostridia	Clostridiales	Ruminococcaceae	Family_Ruminococcaceae	Family_Ruminococcaceae	ASV_0326	0	0	6.19253e-05	1.41858e-05	0	0	0	0	0	0	0	0.000201744	0	0	1.18514e-05	0	0	0	0	0	0	0	0	1.26113e-05	0	0	6.50809e-05	1.17412e-05	0	0	0	0	0	0	0	1.56873e-05	0	0	0	0	0	0	0
Firmicutes	Clostridia	Clostridiales	Ruminococcaceae	Family_Ruminococcaceae	Family_Ruminococcaceae	ASV_0358	0	0	0	0	0	0	0	0	0	0	0	0	0	0	0	0	0	0	0	1.35953e-05	0	0	0	1.26113e-05	0	0	0	2.34824e-05	0	0	0	0	0	0	0	6.2749e-05	0	0	0	0	0	0	0
Firmicutes	Clostridia	Clostridiales	Ruminococcaceae	Family_Ruminococcaceae	Family_Ruminococcaceae	ASV_0362	0	0	0	0	0	0	0	0	0	0	0	2.2416e-05	0	0	3.55543e-05	0	0	0	0	0	0	0	0	0	0	0	1.62702e-05	7.04473e-05	0	0	0	0	0	0	0	0	0	0	0	1.06767e-05	0	0	0
Firmicutes	Clostridia	Clostridiales	Ruminococcaceae	Family_Ruminococcaceae	Family_Ruminococcaceae	ASV_0396	0	0	0	0	0	0	0	0	0	0	9.18189e-05	0	0	0	1.18514e-05	0	0	0	0	0	0	0	0	0	0	0	0	0	0	0	0	0	0	0	0	0	0	0	0	0	1.62543e-05	0	0
Firmicutes	Clostridia	Clostridiales	Ruminococcaceae	Family_Ruminococcaceae	Family_Ruminococcaceae	ASV_0414	0	0	0	0	0	0	0	0	0	0	0	0	0	0	0	4.63967e-05	0	0	0	2.71905e-05	0	0	0	0	0	0	0	0.000129153	0	0	0	0	0	0	0	3.13745e-05	0	0	0	0	0	0	0
Firmicutes	Clostridia	Clostridiales	Ruminococcaceae	Family_Ruminococcaceae	Family_Ruminococcaceae	ASV_0415	0	0	0	0	0	0	0	0	0	0	0	0	0	0	2.37029e-05	0	0	0	0	2.71905e-05	0	0.00046859	0	0	0	0	0	0	0	0	0	0	0	0	0	0	0	0	0	0	0	0	0
Firmicutes	Clostridia	Clostridiales	Ruminococcaceae	Family_Ruminococcaceae	Family_Ruminococcaceae	ASV_0418	0	1.61168e-05	4.64439e-05	0	0	0	0	1.14407e-05	0	0	0	0	0	3.51095e-05	0	6.95951e-05	0	0	0	1.35953e-05	0	0	0	1.26113e-05	0	0.000103239	4.88106e-05	0.000164377	0	0	0	0	0	2.8562e-05	0	0	0	4.46183e-05	1.72491e-05	2.13534e-05	0	2.03525e-05	0
Firmicutes	Clostridia	Clostridiales	Ruminococcaceae	Family_Ruminococcaceae	Family_Ruminococcaceae	ASV_0435	0	0	3.09626e-05	1.41858e-05	0	0	0	0	0	0	0	0	0	0	0	3.47975e-05	0	0	0	2.71905e-05	0	0	0	0	0	0	3.25404e-05	4.69649e-05	0	0	0	0	0	0	0	0	0	0	0	0	0	0	0
Firmicutes	Clostridia	Clostridiales	Ruminococcaceae	Family_Ruminococcaceae	Family_Ruminococcaceae	ASV_0438	0	0	0	2.83716e-05	0	0	0	0	0	0	0	0	0	0	0	3.47975e-05	0	0	0	5.43811e-05	0	0	0	7.56678e-05	0	0	0	0.000223083	0	0	0	0	0	0	0	0	0	0	0	1.06767e-05	0	0	0
Firmicutes	Clostridia	Clostridiales	Ruminococcaceae	Family_Ruminococcaceae	Family_Ruminococcaceae	ASV_0441	0	0	0	0	0	0	0	0	0	0	0	0	0	0	0	0	0	0	0	1.35953e-05	0	0	0	0	0	0	0	0	0	0	0	1.32961e-05	0	0	0	1.56873e-05	0	0	0	0	0	0	0
Firmicutes	Clostridia	Clostridiales	Ruminococcaceae	Family_Ruminococcaceae	Family_Ruminococcaceae	ASV_0456	0	0	0	0	0	0	0	0	0	0	0	0	0	0	0	0	0	0	0	0	0	0	0	0	0	0	0	0	0	0	0	0	0	0	0	0	0	0	0	0	0	0	0
Firmicutes	Clostridia	Clostridiales	Ruminococcaceae	Family_Ruminococcaceae	Family_Ruminococcaceae	ASV_0483	3.20749e-05	0	0	0	0	0	0	0	0	0	0	0	2.00874e-05	0	0	0	0	0	0	0	0	0	0	0	1.91972e-05	0	0	0	0	0	0	0	0	0	0	0	1.36333e-05	0	0	0	0	0	0
Firmicutes	Clostridia	Clostridiales	Ruminococcaceae	Family_Ruminococcaceae	Family_Ruminococcaceae	ASV_0520	0	0	1.54813e-05	0	0	0	0	0	0	0	0	0	0	0	0	0	0	0	1.34765e-05	0	0	0	0	0	0	0	0.000113892	0	0	0	0	0	0	0	0	0	0	0	1.72491e-05	0	0	0	0
Firmicutes	Clostridia	Clostridiales	Ruminococcaceae	Flavonifractor	Genus_Flavonifractor	ASV_0218	0	0	0	0	0	0	0	0	0	0	0	0	0	0	0	0	0	0	0	0	0	0.00027916	0	0	0	0	0	0	0	0	0	0	0	1.4281e-05	0	0	0	0	0	0	0	0	0
Firmicutes	Clostridia	Clostridiales	Ruminococcaceae	Flavonifractor	Genus_Flavonifractor	ASV_0419	0	4.83504e-05	0	0	0	0	0	0	0	0	0	0	0	4.68126e-05	0	0	0	0	0	0	0	0	0	1.26113e-05	0	6.45245e-05	1.62702e-05	3.52237e-05	0	0	0	1.32961e-05	0	0	0	0	0	5.94911e-05	0	0	0	0	0
Firmicutes	Clostridia	Clostridiales	Ruminococcaceae	Flavonifractor	plautii	ASV_0105	1.06916e-05	0	0	0	0	0	0	1.14407e-05	0.000741679	0	0	0.000134496	2.00874e-05	2.34063e-05	0	0	0	1.02977e-05	0	0	0	0.000797599	0	0	1.91972e-05	2.58098e-05	0	0	0	0	0	0	0.000625152	0.000185653	0	7.84363e-05	1.36333e-05	1.48728e-05	0	0	0	0	0
Firmicutes	Clostridia	Clostridiales	Ruminococcaceae	Gemmiger	formicilis	ASV_0024	6.41499e-05	0.0327171	0.0327739	0.00912147	2.01321e-05	0.0019913	0.00195289	0.0011784	0.000108538	0.00173875	0.00153032	0.00385555	7.03058e-05	0.022353	0.0310033	0.00756266	0	0.00234788	0.0150668	0.00614506	1.25343e-05	0.0111564	0.0212871	0.00842434	3.83943e-05	0.0318364	0.0366568	0.0194435	0	0.00133493	0.00151681	0.00117006	1.52476e-05	0.00107108	0.00133332	0.00426693	2.72665e-05	0.03565	0.0237003	0.0101322	4.8763e-05	0.00117027	0.00156155
Firmicutes	Clostridia	Clostridiales	Ruminococcaceae	Hydrogeniiclostridium	Genus_Hydrogeniiclostridium	ASV_0447	3.20749e-05	0	0	0	0	0	0	0	0	0	0	0	0	0	0	0	0	0	0	0	0	4.985e-05	0	0	0	0	0	0	0	0	0	0	0	0	0	0	0	1.48728e-05	0	0	0	0	0
Firmicutes	Clostridia	Clostridiales	Ruminococcaceae	Hydrogenoanaerobacterium	Genus_Hydrogenoanaerobacterium	ASV_0428	0	0	1.54813e-05	0	0	0	0	0	0	0	0	0	0	0	2.37029e-05	0	0	0	0	2.71905e-05	0	0	0	0	0	0	0	1.17412e-05	0	0	0	0	0	0	0	0	0	0	3.44982e-05	0	0	0	1.21051e-05
Firmicutes	Clostridia	Clostridiales	Ruminococcaceae	Intestinimonas	Genus_Intestinimonas	ASV_0032	1.06916e-05	0	6.19253e-05	1.41858e-05	0	3.53486e-05	0.0217178	4.57629e-05	1.80897e-05	0	0.0141095	2.2416e-05	9.03932e-05	0	2.37029e-05	0	0	0	1.34765e-05	0	0	9.96999e-06	0	1.26113e-05	9.59859e-06	0	8.13511e-05	3.52237e-05	0	0	0.00443572	0	0	1.4281e-05	0.0319043	1.56873e-05	0	0	6.89964e-05	2.13534e-05	0.000406359	0	0.00130735
Firmicutes	Clostridia	Clostridiales	Ruminococcaceae	Intestinimonas	Genus_Intestinimonas	ASV_0145	0	0	7.74066e-05	4.25574e-05	0	0	0	0	0	0	0	0.000313824	0	2.34063e-05	5.92572e-05	0.000127591	0	0	0	0.000271905	0	0	0	0.000151336	0	2.58098e-05	0.000211513	0.000986263	0	0	0	0	0	0	0	0.000203934	1.36333e-05	2.97455e-05	5.17473e-05	0.000138797	0	0	0
Firmicutes	Clostridia	Clostridiales	Ruminococcaceae	Intestinimonas	Genus_Intestinimonas	ASV_0159	1.06916e-05	0	0	0	0	0	0	0	0	0	0	0	0	0	0	0	0	0	0	0	0	0	1.1457e-05	0	0	0	0	0	0	0	0	0	0	0	0	3.13745e-05	1.36333e-05	1.48728e-05	0	0	0	0	1.21051e-05
Firmicutes	Clostridia	Clostridiales	Ruminococcaceae	Intestinimonas	Genus_Intestinimonas	ASV_0165	0	0	0	0	0	0	0	1.14407e-05	0	0	0.000367276	0	0	0	0	0	0	0	0	2.71905e-05	0	0	0	0	0	0	3.25404e-05	3.52237e-05	0	0	0	0	0	0	0	0	0	0	0	0	6.50174e-05	0	0
Firmicutes	Clostridia	Clostridiales	Ruminococcaceae	Intestinimonas	Genus_Intestinimonas	ASV_0262	0	0	0	0	2.01321e-05	0	0	0	0.00142909	0	0	2.2416e-05	0	0	0	0	0	0	0	0	0	0	0	0	0	0	0	0	0	0	0	0	0.000548914	0	0	0	0	0	0	0	9.75261e-05	0	0
Firmicutes	Clostridia	Clostridiales	Ruminococcaceae	Intestinimonas	Genus_Intestinimonas	ASV_0306	0	0	0	0	0	0	0	0	0	4.34688e-05	0	0	0	0	0	0	0	0	0	0	0	0	0	0	0	0	1.62702e-05	0	0	0	0	2.65922e-05	0	0	0	0	0	0	0	0	0	0	0
Firmicutes	Clostridia	Clostridiales	Ruminococcaceae	Intestinimonas	Genus_Intestinimonas	ASV_0378	0	0	0	0	0	0	0	1.14407e-05	0	0	0	0	0	0	0	0	0	0	0	0	0	0	0	0	0	0	0	0	0	0	0	0	0	0	0	0	0	0	0	0	0	0	0
Firmicutes	Clostridia	Clostridiales	Ruminococcaceae	Intestinimonas	Genus_Intestinimonas	ASV_0451	0	0	0	0	0	0	0	0	0	0	0	0	0	0	0	0	0	0	0	0	0	0	0	0	0	0	0	0	0	0	0	0	0	0	0	0	0	0	0	0	0	0	0
Firmicutes	Clostridia	Clostridiales	Ruminococcaceae	Intestinimonas	butyriciproducens	ASV_0261	0	0	0	0	2.01321e-05	0	0	0	0.000162808	0.000304282	0	0	0	0	0	0	0	0	0	0	0	0	0	0	0	0	0	0	0	0	0	0	0.000182971	0	0	0	0	1.48728e-05	0	0	1.62543e-05	0	0
Firmicutes	Clostridia	Clostridiales	Ruminococcaceae	Lawsonibacter	Genus_Lawsonibacter	ASV_0189	0	0	0	1.41858e-05	4.02641e-05	0	0	2.28815e-05	0.000180897	0	1.53032e-05	0.000358656	1.00437e-05	1.17032e-05	0	0	0	0	0	1.35953e-05	0	0	0	0	0	0	0	9.39298e-05	0	0	0	2.65922e-05	0.000548914	0	0	0.000580429	0	2.97455e-05	0	1.06767e-05	3.25087e-05	0	0
Firmicutes	Clostridia	Clostridiales	Ruminococcaceae	Monoglobus	Genus_Monoglobus	ASV_0150	0.00237354	0	0	0	0.00010066	0	0	0	0	0	0	0	0.00207904	0	0	0	0.000272846	0	0	0	0.00235645	0	0	0	0.00424258	0	0	0	7.13861e-05	0	0	0	0	0	0	0	0.00554874	0	0	0	0	0	0
Firmicutes	Clostridia	Clostridiales	Ruminococcaceae	Neglecta	Genus_Neglecta	ASV_0149	1.06916e-05	0.00040292	0.0034833	0.00017023	0	1.17829e-05	0.000288347	0.000114407	1.80897e-05	0	0.000168335	0	4.01748e-05	0.000198954	0.00184882	0.000208785	0	1.02977e-05	1.34765e-05	0.000462239	0	0	3.4371e-05	0.000277448	0	0.000490386	0.00344929	0.000739697	0	0	7.64779e-05	2.65922e-05	0	0	2.72105e-05	0	0	0.000282583	0.00146617	0.000202857	0	0	1.21051e-05
Firmicutes	Clostridia	Clostridiales	Ruminococcaceae	Neglecta	Genus_Neglecta	ASV_0172	0.00276914	0	0	4.25574e-05	4.02641e-05	0	0	0	3.61795e-05	0	0	0	0.00189826	0	0	0	0.00038828	0	0	0	0.00116569	0	0	0	0.00162216	0	0	0	0	0	0	0	0	1.4281e-05	0	0	0.000886162	0	0	0	9.75261e-05	0	0
Firmicutes	Clostridia	Clostridiales	Ruminococcaceae	Neglecta	Genus_Neglecta	ASV_0211	0.0019245	0	0	0	0	0	0	0	3.61795e-05	0	0	0	0.00163712	0	0	0	3.14822e-05	0	0	8.15716e-05	0.000401098	0	1.1457e-05	1.26113e-05	0.00124782	0	0	1.17412e-05	7.13861e-05	0	0	0	0	0	0	0	0.000313565	0	0	0	3.25087e-05	0	0
Firmicutes	Clostridia	Clostridiales	Ruminococcaceae	Oscillibacter	Genus_Oscillibacter	ASV_0067	0	0	0	1.41858e-05	0	0	3.932e-05	0.000503392	0	0	0.000489701	0.0525655	3.01311e-05	0	0	1.15992e-05	0	1.02977e-05	0	0	0	0	0	0	0	0	0.000162702	3.52237e-05	0	0	0	0.000757878	0	0	0.000204079	0.0350453	0	1.48728e-05	1.72491e-05	1.06767e-05	0	2.03525e-05	0
Firmicutes	Clostridia	Clostridiales	Ruminococcaceae	Oscillibacter	Genus_Oscillibacter	ASV_0349	0	0	0	0	0	0	6.55334e-05	0	0	0	0.000887583	0	0	0	0	0	0	0	0	0	0	0	0	0	0	0	0	0	0	0	1.27463e-05	0	0	0	0.00028571	0	0	0	0	0	0	0	0
Firmicutes	Clostridia	Clostridiales	Ruminococcaceae	Oscillibacter	Genus_Oscillibacter	ASV_0493	0	0	0	0	0	0	0	0	0	0	0	0	0	0	0	0	0	0	0	0	0	0	0	0	0	0	0	1.17412e-05	0	0	0	0	0	0	0	0	0	0	0	0	0	0	0
Firmicutes	Clostridia	Clostridiales	Ruminococcaceae	Oscillibacter	Genus_Oscillibacter	ASV_0507	0	0	0	0	0	0	0	0	0	0	0	0.00011208	0	0	0	0	0	0	0	0	0	0	0	0	0	0	0	0	0	0	0	0	0	0	0	6.2749e-05	0	0	0	0	0	0	0
Firmicutes	Clostridia	Clostridiales	Ruminococcaceae	Paludicola	Genus_Paludicola	ASV_0138	0.000320749	0	0.000247701	0	6.03962e-05	0	1.31067e-05	0	0.000253256	0	0	0	0.000231005	0	9.48114e-05	0	1.04941e-05	0	0	0	0	0	0	0	0.000239965	0	9.76213e-05	1.17412e-05	0	0	0	0	3.04952e-05	0	0	0	0.000218132	0	0.000206989	0	4.8763e-05	0	0
Firmicutes	Clostridia	Clostridiales	Ruminococcaceae	Paludicola	Genus_Paludicola	ASV_0310	0	0	0	0	0	0	0	0	0	0	0	0	0	0	0	0	0	0	0	0	0	0	0	1.26113e-05	0	0	0	5.87061e-05	0	0	0	0	0	0	0	0	0	0	0	0	0	0	0
Firmicutes	Clostridia	Clostridiales	Ruminococcaceae	Phocea	Genus_Phocea	ASV_0093	0	1.61168e-05	0	0	0.00414721	0	0	6.86444e-05	0.00801375	0	0	0.00251059	1.00437e-05	0	0	0	0	0	0	0	0	0	0	0	0	0	1.62702e-05	0	0.00397383	0	0	0	0.00535192	0	0	0.00194522	0	0	1.72491e-05	0	0.00134911	0	0
Firmicutes	Clostridia	Clostridiales	Ruminococcaceae	Phocea	Genus_Phocea	ASV_0498	0	0	0	0	0	0	0	0	0	0	0	0	2.00874e-05	0	0	0	0	0	0	0	0	0	0	0	9.59859e-06	0	0	0	0	0	0	0	0	0	0	0	0	0	0	0	0	0	0
Firmicutes	Clostridia	Clostridiales	Ruminococcaceae	Pseudoflavonifractor	Genus_Pseudoflavonifractor	ASV_0459	4.27666e-05	0	0	0	0	0	0	0	0	0	0	0	2.00874e-05	0	0	0	3.14822e-05	0	0	5.43811e-05	1.25343e-05	0	0	2.52226e-05	2.87958e-05	0	0	4.69649e-05	0	0	0	0	0	0	0	0	5.45331e-05	0	0	3.20301e-05	0	0	0
Firmicutes	Clostridia	Clostridiales	Ruminococcaceae	Ruminococcus	Genus_Ruminococcus	ASV_0331	0	0	0	0.000184415	0	0	0	6.86444e-05	0	0	0	2.2416e-05	0	0	0	0.000197186	0	0	0	5.43811e-05	0	0	0	1.26113e-05	0	0	0	9.39298e-05	0	0	0	0	0	0	0	0	0	0	0	0.000352331	0	0	0
Firmicutes	Clostridia	Clostridiales	Ruminococcaceae	Ruminococcus	bromii	ASV_0040	0	1.61168e-05	0.00145524	0.00303576	0	4.71315e-05	5.24267e-05	0.000251696	1.80897e-05	0.00686807	3.06063e-05	0.00011208	6.02621e-05	2.34063e-05	0.00135106	0.00356095	2.09881e-05	1.02977e-05	1.34765e-05	0.00168581	0	0	0.000160398	0.00372033	0	1.29049e-05	0.00165956	0.00326406	0	0	2.54926e-05	0.000252626	1.52476e-05	0.00628365	0	0.000188247	0	0	0.000655466	0.00324571	0	0	7.26304e-05
Firmicutes	Clostridia	Clostridiales	Ruminococcaceae	Ruminococcus	callidus	ASV_0179	0	0	0	0.000113486	0	0	5.24267e-05	0	0	0	0.000719248	0.00183811	0	0	1.18514e-05	6.95951e-05	0	0	0	2.71905e-05	0	0	0	0	0	0	9.76213e-05	0.000140895	0	0	0.00024218	0	0	0	0.00110203	0.0048003	0	0	0	9.60902e-05	0	0	7.26304e-05
Firmicutes	Clostridia	Clostridiales	Ruminococcaceae	Ruthenibacterium	Genus_Ruthenibacterium	ASV_0131	0.0019245	0.00117653	3.09626e-05	2.83716e-05	0.000503302	8.24801e-05	2.62134e-05	1.14407e-05	0.00133864	0.000217344	0.000122425	6.7248e-05	0.00121529	0.000620268	0	2.31984e-05	0.00124879	0	0	0.000108762	0.00122836	0	0	6.30565e-05	0.00144939	0.00118725	3.25404e-05	0.000129153	9.51814e-05	5.80403e-05	2.54926e-05	0	0	0	2.72105e-05	3.13745e-05	0.00129516	0.00120469	0	3.20301e-05	0.00100777	7.12338e-05	3.63152e-05
Firmicutes	Erysipelotrichia	Erysipelotrichales	Erysipelatoclostridiaceae	Erysipelatoclostridium	Genus_Erysipelatoclostridium	ASV_0109	0.00508922	1.61168e-05	0	0	0.00221453	0	0	0	0.000162808	0	0	0	0.00700045	0	0	0	0.000755572	0	0	0	0.000564044	0	0	0	0.00600872	0	0	0	0.00128495	0	0	0	0	0	0	0	0.0106339	1.48728e-05	0	1.06767e-05	0.000341341	0	0
Firmicutes	Erysipelotrichia	Erysipelotrichales	Erysipelotrichaceae	Catenibacterium	Genus_Catenibacterium	ASV_0195	0	0	0	0.00123417	0.000120792	0	0.00031456	0.000560596	0	0	0.000397882	0.000156912	0	0	0	0.000626356	0	0	0	0.000435049	0	0	0	0.000189169	0	0	0	0.000986263	4.75907e-05	1.16081e-05	0.000152956	0.000345699	0	0	0.000136053	3.13745e-05	0	0	1.72491e-05	0.000704661	0	0	1.21051e-05
Firmicutes	Erysipelotrichia	Erysipelotrichales	Erysipelotrichaceae	Catenibacterium	mitsuokai	ASV_0044	0.0019245	0.00391639	0.000634734	0.0106677	0.00261717	0.000388835	0.00975137	0.00743648	0.000126628	8.69376e-05	0.00431549	0.00172603	0.00215939	0.00197783	0.000130366	0.00961572	0.000104941	3.08931e-05	1.34765e-05	0.00897288	0.000162946	2.991e-05	0	0.00322849	0.00173734	0.00480062	0.000227783	0.0135729	0.000809042	0.000243769	0.00425727	0.00295174	3.04952e-05	8.56861e-05	0.00219045	0.000768676	0.00351738	0.00334637	0.000327733	0.00911789	0.000130035	0.000122115	9.68406e-05
Firmicutes	Erysipelotrichia	Erysipelotrichales	Erysipelotrichaceae	Clostridium_XVIII	spiroforme	ASV_0496	0	0	0	0	0	0	0	0	0	0	0	0	5.02185e-05	0	0	0	0	0	0	0	0	0	0	0	0	0	0	0	0	0	0	0	0	0	0	0	0	0	0	0	0	0	0
Firmicutes	Erysipelotrichia	Erysipelotrichales	Erysipelotrichaceae	Faecalibacillus	Genus_Faecalibacillus	ASV_0075	0.000502507	0.00681741	0.000603771	0.00358901	0.00010066	0.000318137	0.00803439	0.00014873	0.000198987	4.34688e-05	0.00120895	0.00022416	0.000361573	0.00486851	0.00058072	0.00330577	0.000230869	0.000247145	0	0.0019985	0.000488838	0.00010967	0	0.00117285	0.000374345	0.00877533	0.000683349	0.00396853	0	0.000371458	0.00186096	0.000132961	0	0.000128529	0.0002585	0.000156873	0.000149966	0.00786769	0.000655466	0.00303218	1.62543e-05	0.000213701	0.000157366
Firmicutes	Erysipelotrichia	Erysipelotrichales	Erysipelotrichaceae	Faecalibacillus	Genus_Faecalibacillus	ASV_0163	0	0.00286879	0.000185776	8.51148e-05	0	0.00016496	0	0	0	8.69376e-05	0	0	1.00437e-05	0.0014746	5.92572e-05	2.31984e-05	0	4.11908e-05	0	1.35953e-05	0	9.96999e-06	0	0	0	0.00334237	6.50809e-05	0.000410943	0	0.000243769	0	1.32961e-05	0	5.71241e-05	0	1.56873e-05	0	0.00391154	0.000103495	5.33834e-05	0	0.000132291	3.63152e-05
Firmicutes	Erysipelotrichia	Erysipelotrichales	Erysipelotrichaceae	Family_Erysipelotrichaceae	Family_Erysipelotrichaceae	ASV_0317	0.000384899	0.000128935	0	5.67432e-05	4.02641e-05	1.17829e-05	0	1.14407e-05	1.80897e-05	0	0	0.00011208	0.000140612	1.17032e-05	0	2.31984e-05	0	1.02977e-05	0	0	0	0	0	0	0.000412739	0.000103239	0	1.17412e-05	0	0	0	0	1.52476e-05	0	0	0	0.000259032	0.000118982	1.72491e-05	3.20301e-05	0	0	0
Firmicutes	Erysipelotrichia	Erysipelotrichales	Erysipelotrichaceae	Holdemanella	Genus_Holdemanella	ASV_0021	0.000138991	0.0376166	0.00800384	0.0628431	4.02641e-05	0.000954412	0.00228056	0.00588054	5.42692e-05	0.000825907	0.00186698	0.00262267	0.00046201	0.0405749	0.00821304	0.0240915	0	0.000566374	0.000256054	0.00912243	1.25343e-05	0.000677959	0.000194769	0.00989987	4.79929e-05	0.0380952	0.00673587	0.0865915	2.37954e-05	0.000731308	0.00174625	0.00288525	7.62381e-05	0.000342745	0.000911552	0.00470618	0.000109066	0.0355757	0.00577845	0.0336636	0.00026007	0.000997273	0.000556833
Firmicutes	Erysipelotrichia	Erysipelotrichales	Erysipelotrichaceae	Holdemania	filiformis	ASV_0323	0.000181758	0	1.54813e-05	0	8.05283e-05	0	0	0	0	0	0	0	0.000130568	0	0	0	0	0	0	0	1.25343e-05	0	0	0	0.000153577	0	0	1.17412e-05	0	0	0	0	0	0	0	0	0.000218132	0	1.72491e-05	0	1.62543e-05	0	0
Firmicutes	Erysipelotrichia	Erysipelotrichales	Erysipelotrichaceae	Holdemania	massiliensis	ASV_0357	6.41499e-05	0.000273986	0	0	0	0	0	0	0	0	0	0	3.01311e-05	8.19221e-05	0	0	0	0	0	0	2.50686e-05	0	0	0	2.87958e-05	0.000154859	0	0	0	0	0	0	0	1.4281e-05	0	0	4.08998e-05	0.000282583	0	0	1.62543e-05	0	0
Firmicutes	Erysipelotrichia	Erysipelotrichales	Erysipelotrichaceae	Massilimicrobiota	Genus_Massilimicrobiota	ASV_0232	0.000833948	0	0	0	0	0	0	0	0	0	0	0	0.0014262	0	0	0	7.34584e-05	0	0	0	6.26716e-05	0	0	0	0.00120942	0	0	0	0	0	0	0	0	0	0	0	0.00141786	0	0	0	1.62543e-05	0	0
Firmicutes	Erysipelotrichia	Erysipelotrichales	Erysipelotrichaceae	Massilimicrobiota	Genus_Massilimicrobiota	ASV_0239	0.00162513	0	0	0	8.05283e-05	0	0	0	1.80897e-05	0	0	0	0.000522272	0	0	0	1.04941e-05	0	0	0	0	0	0	0	0.00143019	0	0	0	4.75907e-05	0	0	0	0	0	0	0	0.000736196	0	0	0	3.25087e-05	0	0
Firmicutes	Erysipelotrichia	Erysipelotrichales	Erysipelotrichaceae	Turicibacter	Genus_Turicibacter	ASV_0078	0	0.000128935	0.0123076	0.000198601	0	0	0.000904361	0.000137289	0	0	0.000382579	2.2416e-05	0	0.000198954	0.0146839	0.000336376	0	0	8.08593e-05	2.71905e-05	0	0	0.000148941	3.78339e-05	0	0.000141954	0.00971332	0.000117412	0	0	0.000892243	0	0	0	9.52368e-05	1.56873e-05	0	0.000118982	0.0144375	0.000320301	0	0	4.84203e-05
Firmicutes	Erysipelotrichia	Erysipelotrichales	Erysipelotrichaceae	Turicibacter	sanguinis	ASV_0289	0	0.000209519	7.74066e-05	0.000113486	0	0	0	3.43222e-05	0	0	3.06063e-05	0	0	0.000327689	5.92572e-05	6.95951e-05	0	1.02977e-05	0	0.000122357	0	0	0	5.04452e-05	0	0.000361337	3.25404e-05	0.000140895	0	0	1.27463e-05	0	0	0	0	0	0	0.000297455	6.89964e-05	0.000149474	0	2.03525e-05	0
Firmicutes	Negativicutes	Acidaminococcales	Acidaminococcaceae	Phascolarctobacterium	Genus_Phascolarctobacterium	ASV_0053	0	1.61168e-05	0	0.000241159	0	0	1.31067e-05	0.011189	1.80897e-05	0	0	0.0142117	5.02185e-05	0	0	0.000347975	0	0	0	6.79763e-05	0	0	0	0.00010089	0	1.29049e-05	0.000113892	0.0017377	0	0	0	0.0225635	0	0	0	0.0125027	0	0	0	0.000256241	0	1.01763e-05	0
Firmicutes	Negativicutes	Acidaminococcales	Acidaminococcaceae	Phascolarctobacterium	succinatutens	ASV_0057	0	0	1.54813e-05	0.000312088	0	0	0	0.010125	0	0	1.53032e-05	0.014548	3.01311e-05	0	0	0.000289979	1.04941e-05	1.02977e-05	0	8.15716e-05	0	0	0	0.000151336	9.59859e-06	0	6.50809e-05	0.0021369	0	0	0	0.0166068	0	0	0	0.0114046	0	0	0	0.000298947	0	0	0
Firmicutes	Negativicutes	Veillonellales	Veillonellaceae	Allisonella	Genus_Allisonella	ASV_0128	0	0	0	2.83716e-05	0	0	0	0	0	0	0	0	3.01311e-05	1.17032e-05	0	0	0	0	0	1.35953e-05	0	0	0	0	0	3.87147e-05	0	7.04473e-05	0	0	0	0.00610291	0	0	0	0.00324726	0	1.48728e-05	0	0	0	0	0
Firmicutes	Negativicutes	Veillonellales	Veillonellaceae	Allisonella	Genus_Allisonella	ASV_0154	0	0	1.54813e-05	1.41858e-05	0	0	0	0	0	0	0	0	1.00437e-05	0	0	0	1.04941e-05	0	0	0	0	0	0	0	0	0	0	8.21886e-05	0	0	0	0.00421487	0	0	1.36053e-05	0.00222759	0	0	0	1.06767e-05	0	0	0
Firmicutes	Negativicutes	Veillonellales	Veillonellaceae	Allisonella	Genus_Allisonella	ASV_0201	0	0	0	1.41858e-05	0	0	0	0	1.80897e-05	0	0	0	0	0	0	1.15992e-05	0	0	0	0	0	0	0	0	0	0	0	3.52237e-05	0	0	0	0.00257944	0	0	0	0.00127067	0	0	0	1.06767e-05	0	0	0
Firmicutes	Negativicutes	Veillonellales	Veillonellaceae	Allisonella	Genus_Allisonella	ASV_0203	0	0	0	0	0	0	0	0	0	0	0	0	0	0	0	0	0	0	0	0	0	0	0	0	0	0	0	2.34824e-05	0	0	0	0.00219386	0	0	0	0.0011138	0	0	0	0	0	0	0
Firmicutes	Negativicutes	Veillonellales	Veillonellaceae	Allisonella	Genus_Allisonella	ASV_0442	0	0	0	0	0	0	0	0	0	0	0	0	0	0	0	0	0	0	0	0	0	0	0	0	0	0	0	0	0	0	0	0	0	0	0	0	0	0	0	0	0	0	0
Firmicutes	Negativicutes	Veillonellales	Veillonellaceae	Dialister	Genus_Dialister	ASV_0063	0	0	9.28879e-05	0	0	0	3.932e-05	2.28815e-05	0	0	0.0553209	0	0	0	5.92572e-05	0	0	0	0	0	1.25343e-05	0	1.1457e-05	0	0	0	0.000130162	0	0	0	5.09853e-05	0	0	0	0.0597135	0	0	0	1.72491e-05	0	0	0	0
Firmicutes	Negativicutes	Veillonellales	Veillonellaceae	Dialister	Genus_Dialister	ASV_0082	0	0	0.000123851	0	0	0	2.62134e-05	0	0	0	0.0382885	0	0	0	4.74057e-05	0	0	0	0	0	0	0	1.1457e-05	0	9.59859e-06	0	0.000146432	0	0	0	7.64779e-05	0	0	0	0.0407477	0	0	0	0	0	0	0	0
Firmicutes	Negativicutes	Veillonellales	Veillonellaceae	Dialister	Genus_Dialister	ASV_0142	0	0	0	0	0	0	0	0	0	0	0.00621308	0	0	0	0	0	0	0	0	0	0	0	0	0	0	0	0	0	0	0	0	0	0	0	0.00334689	0	0	0	0	0	0	0	0
Firmicutes	Negativicutes	Veillonellales	Veillonellaceae	Dialister	Genus_Dialister	ASV_0151	0.00438357	0	0	0	4.02641e-05	0	0	0	0.000144718	0	0	0	0.00207904	2.34063e-05	0	1.15992e-05	9.44465e-05	0	0	0	0.000288289	0	0	0	0.00308115	0	0	0	0.000237954	0	0	0	0.000121981	0	0	0	0.00340832	0	0	0	6.50174e-05	0	0
Firmicutes	Negativicutes	Veillonellales	Veillonellaceae	Dialister	Genus_Dialister	ASV_0276	0	1.61168e-05	0	0	0	0	0	0	0	0	0.000612126	0	0	2.34063e-05	0	0	0	0	0	0	0	0	0	0	0	0	0	0	0	0	0	0	0	0	0.00118366	0	0	0	0	0	0	0	0
Firmicutes	Negativicutes	Veillonellales	Veillonellaceae	Dialister	Genus_Dialister	ASV_0315	0	0	0	0	0	0	0	0	0	0	0.000351973	0	0	1.17032e-05	0	0	0	0	0	0	0	0	0	0	0	0	0	0	0	0	0	0	0	0	0.000870736	0	0	0	0	0	0	0	1.21051e-05
Firmicutes	Negativicutes	Veillonellales	Veillonellaceae	Dialister	Genus_Dialister	ASV_0491	0	0	0	0	0	0	0	0	0	0	0.000137728	0	0	0	0	0	0	0	0	0	0	0	0	0	0	0	0	0	0	0	0	0	0	0	0.000176868	0	0	0	0	0	0	0	0
Firmicutes	Negativicutes	Veillonellales	Veillonellaceae	Dialister	propionicifaciens	ASV_0081	0	0	0	0	0	0	0	2.28815e-05	0	0	0.00860037	0	0	0	0	0	0	0	0	0	0	0	0	0	9.59859e-06	1.29049e-05	0	0	0	0	0	0	0	1.4281e-05	0.00195916	0	0	0	0	0	0	0	1.21051e-05
Firmicutes	Negativicutes	Veillonellales	Veillonellaceae	Megasphaera	Genus_Megasphaera	ASV_0472	0	0	0	1.41858e-05	0	0	0	0	0	0	0	0	0	0	0	1.15992e-05	0	0	0	0	0	0	0	0	0	0	0	0.000223083	0	0	0	0	0	0	0	0	0	0	0	5.33834e-05	0	0	0
Firmicutes	Negativicutes	Veillonellales	Veillonellaceae	Negativicoccus	Genus_Negativicoccus	ASV_0038	0	0	0	0	0.000120792	0	2.62134e-05	1.14407e-05	0.0131151	0.000391219	0.0019588	0	9.03932e-05	0	2.37029e-05	0	0	0	0	0	0	0	0	1.26113e-05	9.59859e-06	0	0	0	0.000142772	0	0.000114717	0	0.0257837	0.0316753	0.00194555	0	0	0	0	0	6.50174e-05	1.01763e-05	0.000738409
Firmicutes	Negativicutes	Veillonellales	Veillonellaceae	Negativicoccus	Genus_Negativicoccus	ASV_0061	0	0	0	1.41858e-05	0.000301981	1.17829e-05	0	2.28815e-05	0.0240232	0	0	0	1.00437e-05	0	1.18514e-05	0	0	0	4.04296e-05	0	0	0	0	0	0	0	0	0	0.000166568	0	0	0	0.02432	0.000542679	0	0	0	0	0	0	3.25087e-05	0	1.21051e-05
Firmicutes	Negativicutes	Veillonellales	Veillonellaceae	Negativicoccus	Genus_Negativicoccus	ASV_0084	0	0	0	0	0	0	0	0	0.00121201	0	0.000489701	0	0.000100437	0	0	0	0	0	0	0	0	0	0	0	0	0	0	0	7.13861e-05	0	2.54926e-05	0	0.0134941	0.0222498	0.000340131	0	0	1.48728e-05	0	0	0	0	0.000157366
Firmicutes	Negativicutes	Veillonellales	Veillonellaceae	Negativicoccus	Genus_Negativicoccus	ASV_0188	0	0	0	0	0	0	2.62134e-05	0.00016017	5.42692e-05	0.000130406	3.06063e-05	0.000291408	1.00437e-05	0	0	0	0	0	0	0	0	0	0	0	0	0	0	0	0	0	1.27463e-05	1.32961e-05	0.000106733	0.00415578	0.000149658	1.56873e-05	0	0	0	0	0	0	4.84203e-05
Firmicutes	Negativicutes	Veillonellales	Veillonellaceae	Negativicoccus	Genus_Negativicoccus	ASV_0244	0	0	0	0	0	0	0	0	0.000434153	0	6.12126e-05	0	1.00437e-05	0	0	0	0	0	0	0	0	0	0	0	0	0	0	0	0	0	0	0	0.000869114	0.000771175	2.72105e-05	0	0	0	0	0	1.62543e-05	0	2.42101e-05
Firmicutes	Negativicutes	Veillonellales	Veillonellaceae	Negativicoccus	Genus_Negativicoccus	ASV_0280	0	0	0	0	0	0	0	0	0	0	0.00130077	0	0	0	0	0	0	0	0	0	0	0	0	0	0	0	0	0	0	0	0	0	0	0	4.08158e-05	0	0	0	0	0	0	0	0
Firmicutes	Negativicutes	Veillonellales	Veillonellaceae	Negativicoccus	Genus_Negativicoccus	ASV_0368	0	0	0	0	0	0	0	0	0	0	0.000459095	0	0	0	0	0	0	0	0	0	0	0	0	0	0	0	0	0	0	0	0	0	0	0	4.08158e-05	0	0	0	0	0	0	0	0
Firmicutes	Negativicutes	Veillonellales	Veillonellaceae	Negativicoccus	Genus_Negativicoccus	ASV_0470	0	0	0	0	0	0	0	0	3.61795e-05	0	0	0	0	0	0	0	0	0	0	0	0	9.96999e-06	0	0	0	0	0	0	0	0	0	0	0.000167724	0	0	0	0	0	0	0	0	0	0
Firmicutes	Phylum_Firmicutes	Phylum_Firmicutes	Phylum_Firmicutes	Phylum_Firmicutes	Phylum_Firmicutes	ASV_0048	9.62248e-05	0.000241752	9.28879e-05	0.0121147	0.000120792	0.00195596	0.0043252	0.00316908	0.000289436	0.000217344	0.00404003	0.000403488	0.000291267	4.68126e-05	1.18514e-05	0.00539362	5.24703e-05	5.14885e-05	1.34765e-05	0.0119366	0.00017548	0.00038883	1.1457e-05	0.0199385	0.000191972	7.74293e-05	8.13511e-05	0.0195491	7.13861e-05	0.000313418	0.0013766	0.00226034	7.62381e-05	0.000628365	0.0057006	0.00130204	4.08998e-05	2.97455e-05	0	0.0106126	0.00037385	0.000132291	0.00194892
Firmicutes	Phylum_Firmicutes	Phylum_Firmicutes	Phylum_Firmicutes	Phylum_Firmicutes	Phylum_Firmicutes	ASV_0087	0.00104778	0.000596322	0.000882435	0.00444016	0	2.35657e-05	0	0.000388985	0	0.000304282	0	0.00033624	0.000773364	0.000175547	0.000521463	0.00237783	0	0.00026774	1.34765e-05	0.00467677	0	0.00839473	0	0.00606603	0.000537521	0.000335527	0.00100875	0.00724433	0	0	0	0.000358995	0	0	0	0.000109811	0.000545331	0.000386692	0.000482975	0.00417459	1.62543e-05	2.03525e-05	0
Firmicutes	Phylum_Firmicutes	Phylum_Firmicutes	Phylum_Firmicutes	Phylum_Firmicutes	Phylum_Firmicutes	ASV_0256	0	0	0.000371552	0.000141858	0	0	2.62134e-05	1.14407e-05	0	0	0.000122425	2.2416e-05	0	0	0.000355543	0.000127591	0	0	4.04296e-05	0.000367072	0	0	8.01989e-05	0.000176558	0	0	0.000471836	0.000176118	0	0	0	5.31844e-05	0	0	1.36053e-05	1.56873e-05	0	0	0.000431228	0.000234887	0	0	1.21051e-05
Firmicutes	Phylum_Firmicutes	Phylum_Firmicutes	Phylum_Firmicutes	Phylum_Firmicutes	Phylum_Firmicutes	ASV_0384	0	0	0.000185776	0	0	0	0	0	0	0	0	0	0	0	0.000189623	0	0	0	0	0	0	0	0	0	0	0	0.000244053	0	0	0	2.54926e-05	0	0	0	1.36053e-05	0	0	0	0.000120744	0	0	0	3.63152e-05
Firmicutes	Phylum_Firmicutes	Phylum_Firmicutes	Phylum_Firmicutes	Phylum_Firmicutes	Phylum_Firmicutes	ASV_0402	0.000203141	0	0	0	0	0	0	0	0	0	0	0	0.000140612	0	0	0	0	0	0	0	0	0	0	0	0.000163176	0	0	0	2.37954e-05	0	0	0	0	0	0	0	0.000177232	0	0	0	1.62543e-05	0	0
Firmicutes	Phylum_Firmicutes	Phylum_Firmicutes	Phylum_Firmicutes	Phylum_Firmicutes	Phylum_Firmicutes	ASV_0455	0	0	0	0	0	0	0	0	0	0	0	0	0	0	0	0	0	0	0	0	0	0	0	0	0	0	0	0	0	0	0	0	0	0	0	0	0	0	0	0	0	0	0
Firmicutes	Phylum_Firmicutes	Phylum_Firmicutes	Phylum_Firmicutes	Phylum_Firmicutes	Phylum_Firmicutes	ASV_0502	0	0	0	2.83716e-05	0	0	0	6.86444e-05	0	0	0	0	0	0	0	3.47975e-05	0	0	0	0	0	0	0	0	0	0	0	1.17412e-05	0	0	0	1.32961e-05	0	0	0	0	0	0	0	5.33834e-05	0	0	0
Proteobacteria	Betaproteobacteria	Burkholderiales	Sutterellaceae	Duodenibacillus	Genus_Duodenibacillus	ASV_0412	0	0	0	0	0	0	0	0	0	0	3.06063e-05	0	0	0	0	0	0	0	0	0	0	0	0	0	0	0	0	0	0	0	0	0	0	0	4.08158e-05	0	0	0	0	0	0	0	0.000229996
Proteobacteria	Betaproteobacteria	Burkholderiales	Sutterellaceae	Parasutterella	Genus_Parasutterella	ASV_0170	0	0	0	0	0	0	1.31067e-05	0.00101823	0	0	0.000306063	0.00127771	1.00437e-05	0	0	0	0	0	0	0	0	0	0	0	0	0	1.62702e-05	0	0	0	0	0.00152905	0	0	5.4421e-05	0.00445518	0	0	0	0	0	0	0.000181576
Proteobacteria	Betaproteobacteria	Burkholderiales	Sutterellaceae	Sutterella	Genus_Sutterella	ASV_0098	0	0	0	0	2.01321e-05	0	0	0.00727631	1.80897e-05	0	0	0.0107821	0	0	0	1.15992e-05	0	0	0	0	0	0	0	1.26113e-05	0	0	8.13511e-05	0	2.37954e-05	0	0	0.00860258	1.52476e-05	0	0	0.0142754	0	0	0	0	1.62543e-05	0	0
Proteobacteria	Betaproteobacteria	Burkholderiales	Sutterellaceae	Sutterella	Genus_Sutterella	ASV_0199	0	0	0	0	0	0	0	0.0012356	0	0	0	0.00172603	0	0	0	0	0	0	0	0	0	0	0	0	0	0	0	0	0	0	0	0.00130302	0	0	0	0.00285508	0	0	0	0	0	0	0
Proteobacteria	Betaproteobacteria	Burkholderiales	Sutterellaceae	Sutterella	Genus_Sutterella	ASV_0297	0	0	0	0	6.03962e-05	0	0	0	0.000416064	0	0	0	0	0	0	0	0	0	1.34765e-05	0	0	0	0	0	0	0	0	0	0.000214158	0	0	0	0.000548914	0	0	0	0	0	0	0	0.00102402	0	0
Proteobacteria	Betaproteobacteria	Burkholderiales	Sutterellaceae	Sutterella	Genus_Sutterella	ASV_0462	0	0	0	0	0.000120792	0	0	0	1.80897e-05	0	0	0	0	0	0	0	0	0	0	0	0	0	0	0	0	0	0	0	7.13861e-05	0	0	1.32961e-05	3.04952e-05	0	0	0	0	0	0	0	9.75261e-05	0	0
Proteobacteria	Betaproteobacteria	Burkholderiales	Sutterellaceae	Sutterella	Genus_Sutterella	ASV_0488	0	0	0	0	2.01321e-05	0	0	1.14407e-05	1.80897e-05	0	0	4.4832e-05	0	0	0	0	0	0	0	0	0	0	0	0	0	0	0	0	0	0	0	0	4.57429e-05	0	0	0	0	0	0	0	4.8763e-05	0	0
Proteobacteria	Deltaproteobacteria	Class_Deltaproteobacteria	Class_Deltaproteobacteria	Class_Deltaproteobacteria	Class_Deltaproteobacteria	ASV_0248	0	0	0	0.000354645	0	0	0	0.000102967	0	0	0	0.000156912	0	0	0	0.000231984	0	0	0	0.000176738	0	0	0	0.000113502	0	0	0	0.00240695	0	0	0	0.000159553	0	0	0	0.000141185	0	0	0	0.000469774	0	0	0
Proteobacteria	Deltaproteobacteria	Desulfovibrionales	Desulfovibrionaceae	Bilophila	Genus_Bilophila	ASV_0076	4.27666e-05	0	0	0	4.02641e-05	0	0	0	0.0155029	0	6.12126e-05	0	0	0	3.55543e-05	0	0	0	2.69531e-05	0	0	0	0	0	0	0	0	1.17412e-05	7.13861e-05	0	0	0	0.0248994	0	0	0	0	0	0	0	3.25087e-05	0	0
Proteobacteria	Deltaproteobacteria	Desulfovibrionales	Desulfovibrionaceae	Mailhella	Genus_Mailhella	ASV_0404	0	0	0	7.0929e-05	0	0	0	0	0	0	0	0	0	0	0	4.63967e-05	0	0	0	5.43811e-05	0	0	0	0.000126113	0	0	0	0.000434425	0	0	0	0	0	0	0	0	0	0	0	7.47368e-05	0	0	0
Proteobacteria	Gammaproteobacteria	Enterobacterales	Enterobacteriaceae	Atlantibacter	Genus_Atlantibacter	ASV_0296	0	0	0	0	0.000140924	0	0	0	0.000198987	0	0	0	0	0	0	0	0	0	0	0	1.25343e-05	0	0	0	0	0	0	0	0.000237954	0	0	0	0.000228714	0	0	0	0	0	0	0	0.00063392	1.01763e-05	1.21051e-05
Proteobacteria	Gammaproteobacteria	Enterobacterales	Enterobacteriaceae	Atlantibacter	Genus_Atlantibacter	ASV_0311	0	0	0	0	0.00010066	0	1.31067e-05	0	0.000180897	0	0	0	0	0	0	0	1.04941e-05	0	0	0	5.01373e-05	0	0	0	0	0	0	0	9.51814e-05	0	1.27463e-05	0	0.000274457	0	0	0	0	0	0	0	0.000536393	0	3.63152e-05
Proteobacteria	Gammaproteobacteria	Enterobacterales	Enterobacteriaceae	Atlantibacter	Genus_Atlantibacter	ASV_0425	0	0	0	0	2.01321e-05	0	0	0	7.23589e-05	0	0	0	0	0	0	0	1.04941e-05	0	0	0	0	0	0	0	0	0	0	0	2.37954e-05	0	0	0	6.09905e-05	0	0	0	0	0	0	0	0.000211307	0	1.21051e-05
Proteobacteria	Gammaproteobacteria	Enterobacterales	Enterobacteriaceae	Enterobacter	Genus_Enterobacter	ASV_0073	0	0	0	0	0.00889837	0.00229766	6.55334e-05	5.72037e-05	0.00142909	0.000434688	3.06063e-05	0	6.02621e-05	1.17032e-05	0	0	0.000377786	1.02977e-05	1.34765e-05	1.35953e-05	0.000451235	0	0	0	0	0	3.25404e-05	0	0.00999405	0.00725504	6.37316e-05	0.000252626	0.00190595	0.000999672	0.000149658	0	0	8.92366e-05	0	0	0.0300218	0.00371433	0.000121051
Proteobacteria	Gammaproteobacteria	Enterobacterales	Enterobacteriaceae	Escherichia/Shigella	Genus_Escherichia/Shigella	ASV_0200	0	0	0	0	2.01321e-05	5.89143e-05	1.31067e-05	3.43222e-05	1.80897e-05	4.34688e-05	1.53032e-05	0	0	1.17032e-05	0	0	0	1.02977e-05	0	0	0	0	0	0	0	0	0	0	0	0.000127689	1.27463e-05	0.000106369	4.57429e-05	0.00014281	5.4421e-05	0	0	0	0	0	0	3.05288e-05	0.000108946
Proteobacteria	Gammaproteobacteria	Enterobacterales	Enterobacteriaceae	Escherichia/Shigella	Genus_Escherichia/Shigella	ASV_0214	1.06916e-05	0	0	1.41858e-05	0	0.00119007	0.000262134	3.43222e-05	0	8.69376e-05	0.000275457	0	1.00437e-05	0	0	0	0	1.02977e-05	0	0	0	0	0	0	0	0	0	0	2.37954e-05	0.000603619	0.000407882	3.98883e-05	0	0.000371307	0.000680263	0	0	5.94911e-05	0	0	0	0.00103798	0.00146471
Proteobacteria	Gammaproteobacteria	Enterobacterales	Enterobacteriaceae	Escherichia/Shigella	albertii/boydii/coli/coli,/dysenteriae/fergusonii/flexneri/sonnei/vulneris	ASV_0002	4.27666e-05	0.0015311	0.000278664	0.00110649	0.12957	0.399404	0.113831	0.281122	0.134696	0.117453	0.158434	0.0423662	0.00486115	0.000713893	0.000237029	0.000463967	0.000482727	0.020029	0.0028705	0.0020121	0.000188015	0.0184844	0.00222266	0.000554897	0.000595112	0.000929152	0.0030588	0.00115064	0.09837	0.346153	0.166696	0.614918	0.0884819	0.269469	0.213113	0.0350453	0.000109066	0.00762973	0.00106944	0.000330977	0.00949254	0.489926	0.354545
Proteobacteria	Gammaproteobacteria	Enterobacterales	Enterobacteriaceae	Escherichia/Shigella	coli/dysenteriae/fergusonii/flexneri/sonnei	ASV_0022	1.06916e-05	4.83504e-05	3.09626e-05	4.25574e-05	0.00010066	0.0582074	0.0218226	0.00104111	5.42692e-05	0.0218213	0.0342179	0.00141221	0.000502185	0	0	1.15992e-05	4.19762e-05	0.000381015	0.000619921	5.43811e-05	1.25343e-05	0.00032901	0.000572849	0	6.71901e-05	0	0.000211513	2.34824e-05	0.000142772	0.0536757	0.0407627	0.00113017	9.14857e-05	0.0527827	0.0494143	0.00105105	2.72665e-05	0.000684147	5.17473e-05	0	0.00048763	0.0344771	0.0710447
Proteobacteria	Gammaproteobacteria	Enterobacterales	Enterobacteriaceae	Family_Enterobacteriaceae	Family_Enterobacteriaceae	ASV_0008	1.06916e-05	4.83504e-05	0	2.83716e-05	0.331716	2.35657e-05	6.55334e-05	9.15259e-05	0.389418	4.34688e-05	6.12126e-05	6.7248e-05	0.000231005	3.51095e-05	7.11086e-05	0	0.0113965	1.02977e-05	0.000242578	2.71905e-05	0.0170216	0	0	0	3.83943e-05	2.58098e-05	0	1.17412e-05	0.336681	8.12565e-05	6.37316e-05	9.30727e-05	0.260338	2.8562e-05	6.80263e-05	0	0	0.000104109	0	0	0.421183	8.141e-05	0.000108946
Proteobacteria	Gammaproteobacteria	Enterobacterales	Enterobacteriaceae	Family_Enterobacteriaceae	Family_Enterobacteriaceae	ASV_0160	0	0	0	0	0.00102674	0	0	0	0.00137482	0	0	0	0	0	0	0	0	0	1.34765e-05	0	1.25343e-05	0	0	0	1.91972e-05	0	0	0	0.00237954	0	0	0	0.00118931	0	0	0	1.36333e-05	0	0	0	0.00612789	0	0
Proteobacteria	Gammaproteobacteria	Enterobacterales	Enterobacteriaceae	Family_Enterobacteriaceae	Family_Enterobacteriaceae	ASV_0312	1.06916e-05	0	0	0	0.00142938	0	0	4.57629e-05	0.00220695	0	0	0	0	0	0	0	0	0	0	0	0	0	0	0	0	0	0	2.34824e-05	0	0	0	2.65922e-05	0	0	0	3.13745e-05	1.36333e-05	0	0	0	0	0	0
Proteobacteria	Gammaproteobacteria	Enterobacterales	Enterobacteriaceae	Family_Enterobacteriaceae	Family_Enterobacteriaceae	ASV_0322	0	0	0	0	0.000161057	0	0	0	0.000144718	0	0	0	0	0	0	0	1.04941e-05	0	0	0	0	0	0	0	0	0	0	0	0.00035693	0	0	0	0.000243962	0	0	0	0	0	0	0	0.000357596	0	0
Proteobacteria	Gammaproteobacteria	Enterobacterales	Enterobacteriaceae	Family_Enterobacteriaceae	Family_Enterobacteriaceae	ASV_0347	0	0	0	0	0	0	0.000131067	0	0	0	0.000168335	0	0	0	0	0	0	0	0	0	0	0	0	0	0	0	0	0	0	0	0.000165702	0	0	0	0.000231289	0	0	0	0	0	1.62543e-05	0	0.000229996
Proteobacteria	Gammaproteobacteria	Enterobacterales	Enterobacteriaceae	Raoultella	Genus_Raoultella	ASV_0393	0	0	0	0	0.000301981	0	0	3.43222e-05	0.000777858	0	0	4.4832e-05	1.00437e-05	0	0	1.15992e-05	0	0	0	0	0	0	0	0	0	0	0	0	0	0	0	0	0	0	0	1.56873e-05	0	0	0	0	0	0	0
Proteobacteria	Gammaproteobacteria	Enterobacterales	Enterobacteriaceae	Salmonella	Genus_Salmonella	ASV_0051	0	0	0	0	0	0	0	1.14407e-05	0	0	0	0	0	0	3.55543e-05	0	0	0	0	0	1.25343e-05	0	0	0	0	0	0	0	0	0	0	0	0	0.000456993	0	0	0	0	0	0	0	0	0
Proteobacteria	Gammaproteobacteria	Enterobacterales	Enterobacteriaceae	Salmonella	enterica	ASV_0144	0	0	0	0	0	0	0	0	0	0	0	0	0	0	0	0	0	0	0	0	0	0	0	0	0	0	0	0	0	0	0	0	0	8.56861e-05	0	0	0	0	0	0	0	1.01763e-05	0
Proteobacteria	Gammaproteobacteria	Enterobacterales	Enterobacteriaceae	Shimwellia	Genus_Shimwellia	ASV_0042	0	0	0	0	0.0211588	0.00474849	0	0	0.00401592	0.000304282	0	0	2.00874e-05	0	0	0	0.00112286	1.02977e-05	0	0	0.00104035	2.991e-05	0	0	0	0	4.88106e-05	0	0.0271743	0.0135582	0	2.65922e-05	0.00390339	0.00182797	1.36053e-05	0	0	0.000118982	0	0	0.0674881	0.00769325	4.84203e-05
Proteobacteria	Gammaproteobacteria	Enterobacterales	Erwiniaceae	Pantoea	Genus_Pantoea	ASV_0058	1.06916e-05	0	0	1.41858e-05	0.00676437	0	0	2.28815e-05	0.0089725	0	0	0	2.00874e-05	0	0	0	0.000125929	0	2.69531e-05	0	0.000225618	0	0	0	1.91972e-05	0	0	0	0.0159429	1.16081e-05	0	0	0.00994145	1.4281e-05	0	0	4.08998e-05	1.48728e-05	0	0	0.0410422	0	0
Proteobacteria	Gammaproteobacteria	Pseudomonadales	Pseudomonadaceae	Pseudomonas	aeruginosa/alcaligenes/alcaliphila/anguilliseptica/azelaica/balearica/citronellolis/delhiensis/denitrificans/fluorescens/fragi/guezennei/knackmussii/mendocina/mosselii/nitroreducens/otitidis/panipatensis/peli/pseudoalcaligenes/putida/resinovorans/sp/stutzeri/thermaerum/tropicalis	ASV_0095	0	1.61168e-05	0	0	0	0	0	0	0	0	0	0	0	0	2.37029e-05	0	0	0	0	0	0	0	0	0	0	0	0	0	0	0	0	0	0	0.00028562	0	0	0	0	0	0	0	0	0
Synergistetes	Synergistia	Synergistales	Synergistaceae	Family_Synergistaceae	Family_Synergistaceae	ASV_0321	0	0	0	2.83716e-05	0	0	0	1.14407e-05	0	0	0	0	0	0	0	0.000162389	0	0	0	0.000271905	0	0	0	0.000239615	0	0	0	0.000868851	0	0	0	1.32961e-05	0	0	0	0	0	0	0	0.000245564	0	0	0
Verrucomicrobia	Verrucomicrobiae	Verrucomicrobiales	Akkermansiaceae	Akkermansia	Genus_Akkermansia	ASV_0300	0	0.000612439	0	0	0	5.89143e-05	1.31067e-05	0	0	0.000130406	0	0	0	0.000292579	0	0	0	4.11908e-05	0	0	0	0	0	0	0	0.000813008	0	0	0	3.48242e-05	0	0	0	4.28431e-05	0	0	0	0.000639529	0	0	0	4.0705e-05	0
Verrucomicrobia	Verrucomicrobiae	Verrucomicrobiales	Akkermansiaceae	Akkermansia	muciniphila	ASV_0290	0.000160375	0.000564089	0	0	0	7.06972e-05	0	0	0	0.000130406	0	0	1.00437e-05	0.000339392	0	0	0	0	0	0	0	2.991e-05	0	0	8.63873e-05	0.000619435	0	0	2.37954e-05	4.64323e-05	0	0	0	8.56861e-05	0	0	0.000109066	0.000580038	0	0	3.25087e-05	5.08813e-05	0
[truncated: 28 more columns]

## Sheet: Table S3
			0h		24h		48h
	Medium vs Medium		p-value	p-adj.	p-value	p-adj.	p-value	p-adj.
	High-fiber	Untreated	0.812	0.947	0.041	0.288	0.034	0.102
	High-fiber	Blanch	0.826	0.947	0.058	0.288	0.019	0.102
	High-fiber	Ferment	0.879	0.947	0.03	0.288	0.031	0.102
	High-fiber	Oven	0.804	0.947	0.095	0.288	0.031	0.102
	High-fiber	Low-fiber	0.866	0.947	0.096	0.288	0.025	0.102
	Untreated	Blanch	0.879	0.947	0.807	0.894	0.907	0.972
	Untreated	Ferment	0.809	0.947	0.809	0.894	0.863	0.972
	Untreated	Oven	0.82	0.947	0.896	0.896	0.923	0.972
	Untreated	Low-fiber	0.808	0.947	0.808	0.894	0.709	0.972
	Blanch	Ferment	0.797	0.947	0.797	0.894	0.972	0.972
	Blanch	Oven	0.884	0.947	0.814	0.894	0.89	0.972
	Blanch	Low-fiber	0.827	0.947	0.83	0.894	0.497	0.972
	Ferment	Oven	0.802	0.947	0.834	0.894	0.835	0.972
	Ferment	Low-fiber	1	1	0.701	0.894	0.539	0.972
	Oven	Low-fiber	0.827	0.947	0.659	0.894	0.575	0.972

## Sheet: Table S4
			0h		24h		48h
	Donor vs Donor		p-value	p-adj.	p-value	p-adj.	p-value	p-adj.
	1	2	0.002	0.004	0.002	0.006	0.009	0.009
	1	3	0.003	0.004	0.003	0.006	0.005	0.0072
	1	4	0.003	0.004	0.005	0.007	0.002	0.006
	2	3	0.004	0.004	0.002	0.006	0.006	0.0072
	2	4	0.004	0.004	0.006	0.007	0.004	0.0072
	3	4	0.002	0.004	0.007	0.007	0.002	0.006

## Sheet: Table S5
Sample_ID	Medium	Donor	Time	ASV_0011	ASV_0015	ASV_0017	ASV_0062	ASV_0090	ASV_0103	ASV_0108	ASV_0187	ASV_0192	ASV_0275	ASV_0284	ASV_0304	ASV_0319	ASV_0334	ASV_0338	ASV_0346	ASV_0366	ASV_0373	ASV_0413	ASV_0423	ASV_0468	ASV_0517	ASV_0527
High-fiber_0_1	High-fiber	1	0	0.00065284	8.03495e-05	3.01311e-05	2.00874e-05	5.02185e-05	0	1.00437e-05	0	0	0	0	0	0	0	0	0	2.00874e-05	1.00437e-05	0	0	1.00437e-05	0	0
High-fiber_0_2	High-fiber	2	0	9.36253e-05	0	0.000105328	0	0	1.17032e-05	0	0	0	0	0	0	0	0	0	0	0	0	0	0	0	0	0
High-fiber_0_3	High-fiber	3	0	3.55543e-05	9.48114e-05	0	0	1.18514e-05	0	0	0	0	0	0	0	0	0	0	0	0	0	0	0	0	0	0
High-fiber_0_4	High-fiber	4	0	1.15992e-05	0	1.15992e-05	0	3.47975e-05	0	0	0	0	0	0	0	0	0	0	1.15992e-05	0	0	1.15992e-05	0	0	0	0
Low-fiber_0_1	Low-fiber	1	0	8.51188e-05	3.64795e-05	0	1.21598e-05	1.21598e-05	0	1.21598e-05	0	0	0	1.21598e-05	0	0	0	0	0	0	0	0	0	0	0	0
Low-fiber_0_2	Low-fiber	2	0	2.61742e-05	5.23485e-05	1.30871e-05	0	0	0	0	0	0	0	0	0	0	0	0	0	0	0	0	0	0	0	0
Low-fiber_0_3	Low-fiber	3	0	3.71699e-05	0	4.64624e-05	2.78774e-05	9.29247e-06	0	0	0	0	0	0	0	0	0	0	0	0	0	0	9.29247e-06	0	0	0
Low-fiber_0_4	Low-fiber	4	0	9.39532e-06	0	0	9.39532e-06	9.39532e-06	0	0	0	0	0	0	0	0	0	0	0	0	0	0	0	0	0	0
Con_0_1	Untreated	1	0	2.87958e-05	2.87958e-05	0.000115183	0	0	0	0	9.59859e-06	0	0	0	0	0	0	0	9.59859e-06	0	0	0	0	0	0	0
Con_0_2	Untreated	2	0	5.16196e-05	0	0	0	0	1.29049e-05	1.29049e-05	0	0	0	0	0	0	0	0	0	0	0	0	0	0	0	0
Con_0_3	Untreated	3	0	0.000992483	3.25404e-05	0.00156194	8.13511e-05	6.50809e-05	4.88106e-05	4.88106e-05	0	0	0	0	0	0	0	0	0	0	0	0	1.62702e-05	0	0	0
Con_0_4	Untreated	4	0	8.21886e-05	0	1.17412e-05	0	5.87061e-05	0	0	0	0	0	0	0	0	0	0	0	0	0	0	0	0	0	0
Blanch_0_1	Blanch	1	0	3.20749e-05	6.41499e-05	0	0	0	0	0	0	0	0	0	0	0	0	0	0	0	0	0	0	0	0	0
Blanch_0_2	Blanch	2	0	3.22336e-05	0	0	0	0	0	0	0	0	0	0	0	0	0	0	0	0	0	0	0	0	0	0
Blanch_0_3	Blanch	3	0	1.54813e-05	0	3.09626e-05	1.54813e-05	0	0	0	0	0	0	0	0	0	0	0	0	0	0	0	0	0	0	0
Blanch_0_4	Blanch	4	0	1.41858e-05	8.51148e-05	0	0	0	0	0	0	0	0	0	0	0	0	0	1.41858e-05	0	0	0	0	0	0	0
Ferment_0_1	Ferment	1	0	0	1.36333e-05	1.36333e-05	1.36333e-05	1.36333e-05	1.36333e-05	0	0	0	0	0	0	0	0	0	0	0	0	0	0	0	0	0
Ferment_0_2	Ferment	2	0	0.000118982	8.92366e-05	2.97455e-05	0	0	4.46183e-05	1.48728e-05	0	0	0	0	0	0	0	0	0	0	0	0	0	0	0	0
Ferment_0_3	Ferment	3	0	0	0	0	0	0	0	0	0	0	0	0	0	0	0	0	0	0	0	0	0	0	0	0
Ferment_0_4	Ferment	4	0	2.13534e-05	0	0	0	1.06767e-05	0	0	0	0	0	0	0	0	0	0	0	0	0	0	0	0	0	0
Oven_0_1	Oven	1	0	4.86654e-05	2.43327e-05	0	0	0	0	0	0	0	0	0	0	0	0	0	0	0	0	0	0	0	0	0
Oven_0_2	Oven	2	0	0.000128883	1.84118e-05	0	0	0	0	0	0	0	0	0	0	0	0	0	0	0	0	0	0	0	0	0
Oven_0_3	Oven	3	0	6.3043e-05	1.26086e-05	0	0	0	0	0	0	0	0	0	0	0	0	0	0	0	0	1.26086e-05	0	0	0	0
Oven_0_4	Oven	4	0	1.28302e-05	0	0	0	0	0	0	0	0	0	0	0	0	0	0	0	0	0	0	0	0	0	0
High-fiber_24_1	High-fiber	1	24	0.000188893	4.19762e-05	2.09881e-05	3.14822e-05	1.04941e-05	1.04941e-05	0	1.04941e-05	0	0	0	0	0	0	0	0	0	0	0	0	0	0	0
High-fiber_24_2	High-fiber	2	24	1.02977e-05	2.05954e-05	4.11908e-05	0	0	0	0	0	0	0	0	0	0	0	0	0	0	0	0	0	0	0	0
High-fiber_24_3	High-fiber	3	24	0.000107812	0.000404296	1.34765e-05	0	0	0	0	0	0	0	0	0	0	0	0	0	0	0	0	0	0	0	0
High-fiber_24_4	High-fiber	4	24	5.43811e-05	0	0	0	5.43811e-05	0	0	0	0	0	0	0	0	0	1.35953e-05	0	0	0	0	0	0	0	0
Low-fiber_24_1	Low-fiber	1	24	0.0315493	0.00327189	0.000417688	0.00142014	0.00080753	0.00232513	0.000320227	0.00186567	0.000306304	0.000111383	6.96146e-05	0	1.39229e-05	1.39229e-05	0	0	2.78458e-05	0	0	0	0	0	0
Low-fiber_24_2	Low-fiber	2	24	0.0959233	0.000984752	0.000105887	0.00577086	0.00237188	0.00637442	1.05887e-05	0.0017895	0.000772978	0.000370606	0.000391783	0.000412961	5.29437e-05	5.29437e-05	3.17662e-05	0	3.17662e-05	1.05887e-05	0	1.05887e-05	0	0	0
Low-fiber_24_3	Low-fiber	3	24	0.0832807	0.000368406	0.000105259	0.00528399	0.000368406	0	0	0	0.000736811	0.000105259	0.000399983	2.10517e-05	0.000399983	2.10517e-05	2.10517e-05	0.00017894	3.15776e-05	2.10517e-05	0	0	0	0	0
Low-fiber_24_4	Low-fiber	4	24	0.0154378	6.52302e-05	4.34868e-05	0.00136983	0.00235916	0	0.0021526	0	0.000108717	5.43585e-05	6.52302e-05	0	0	3.26151e-05	0.000184819	0	2.17434e-05	0.000141332	2.17434e-05	0	2.17434e-05	0	2.17434e-05
Con_24_1	Untreated	1	24	0.0658894	0.0644616	2.37954e-05	0.000190363	0.00035693	0.00452112	0	0.000142772	0	0.000166568	0	0	0	0	0	0	2.37954e-05	0	0	0	0	0	0
Con_24_2	Untreated	2	24	0.00536293	0	1.16081e-05	0	0.000150905	0.00160191	0	0	9.28645e-05	2.32161e-05	0	0	0	0	0	0	0	0	0	0	0	0	0
Con_24_3	Untreated	3	24	0.00629668	0.000573585	0.000904989	0.000892243	0.000101971	0	0	0	1.27463e-05	1.27463e-05	1.27463e-05	0	2.54926e-05	0	0	5.09853e-05	1.27463e-05	0	0	0	0	0	0
Con_24_4	Untreated	4	24	0.0421487	0.00151576	0.00962638	0.00381598	0.00202101	0	0.00494615	0	0.000465364	0.000186145	6.64805e-05	0	0	9.30727e-05	0.000531844	0	6.64805e-05	9.30727e-05	0.000226034	0	0.000106369	0	2.65922e-05
Blanch_24_1	Blanch	1	24	0.0259905	0.0231921	2.01321e-05	0.00068449	0.000221453	0.00378483	0	0.000744886	2.01321e-05	2.01321e-05	0.000140924	0	0	0	0	0	2.01321e-05	0	0	0	0	0	0
Blanch_24_2	Blanch	2	24	0.00465423	0.000282789	1.17829e-05	0.00352308	0.000188526	0.00413579	0	0	2.35657e-05	3.53486e-05	0	0.000471315	0	0	0	0	0	0	0	0	0	0	0
Blanch_24_3	Blanch	3	24	0.00848002	0.000576694	0.00047184	0.000996107	6.55334e-05	0	0	0	1.31067e-05	3.932e-05	2.62134e-05	0	0.000104853	0	0	5.24267e-05	0	0	0	1.31067e-05	0	6.55334e-05	0
Blanch_24_4	Blanch	4	24	0.0173785	0.000617799	0.00255128	0.000949581	0.000961021	0	0.00217374	0	0.000274578	3.43222e-05	3.43222e-05	0	0	1.14407e-05	0.000205933	0	1.14407e-05	3.43222e-05	1.14407e-05	1.14407e-05	3.43222e-05	0	0
Ferment_24_1	Ferment	1	24	0.0233087	0.136797	6.50174e-05	0.000195052	4.8763e-05	0.00656676	0	0.000178798	0.000162543	1.62543e-05	0.000130035	0	0	0	0	0	3.25087e-05	0	0	0	0	0	0
Ferment_24_2	Ferment	2	24	0.0126389	0.000345993	9.15863e-05	0	0.000122115	0.00571905	0	0	4.0705e-05	4.0705e-05	2.03525e-05	0.000722514	0	1.01763e-05	0	0	0	0	1.01763e-05	0	0	0	0
Ferment_24_3	Ferment	3	24	0.0372352	0.00537465	0.0117056	0.00377678	9.68406e-05	1.21051e-05	0	0	0.000290522	0.000121051	0.000145261	0	3.63152e-05	3.63152e-05	0	0.000169471	2.42101e-05	0	0	1.21051e-05	0	0	0
Ferment_24_4	Ferment	4	24	0.0435781	0.00259144	0.0210397	0.00476264	0.00114864	0	0.00537898	0	0.000154085	7.00388e-05	0.000168093	1.40078e-05	0	4.20233e-05	0.000406225	0	4.20233e-05	7.00388e-05	8.40466e-05	5.6031e-05	0.000140078	0	1.40078e-05
Oven_24_1	Oven	1	24	0.0552653	0.0399634	6.52997e-05	0.000587698	0	0.00430978	0	0.000652997	0.000348265	8.70663e-05	2.17666e-05	0	0	2.17666e-05	0	0	0	0	0	0	0	0	0
Oven_24_2	Oven	2	24	0.00452756	0.00295276	0	0	0	0.000688976	0	0	0	0	0	9.84252e-05	0	0	0	0	0	0	0	0	0	0	0
Oven_24_3	Oven	3	24	0.0116152	0.000250462	0.00028177	0.000939232	1.56539e-05	0	0	0	3.13077e-05	6.26154e-05	0	0	1.56539e-05	0	0	9.39232e-05	3.13077e-05	0	0	0	0	0	0
Oven_24_4	Oven	4	24	0.0301286	0.00108744	0.00276658	0.000959509	0.000863558	3.19836e-05	0.00310241	0	0.000319836	0.000191902	4.79754e-05	0	0	1.59918e-05	0.00017591	0	0	0	1.59918e-05	0	3.19836e-05	0	0
High-fiber_48_1	High-fiber	1	48	0.00017548	2.50686e-05	0	1.25343e-05	0	6.26716e-05	0	5.01373e-05	1.25343e-05	0	0	0	0	0	0	0	0	0	0	0	0	0	0
High-fiber_48_2	High-fiber	2	48	1.994e-05	9.96999e-06	0	0	0	0	0	0	0	0	0	0	0	0	0	0	0	0	9.96999e-06	0	0	0	0
High-fiber_48_3	High-fiber	3	48	1.1457e-05	1.1457e-05	0	0	0	0	0	0	0	0	0	0	0	0	0	0	0	0	0	0	0	0	0
High-fiber_48_4	High-fiber	4	48	0.000189169	0	1.26113e-05	1.26113e-05	1.26113e-05	0	0	0	0	0	0	0	0	0	0	0	0	0	0	0	0	0	0
Low-fiber_48_1	Low-fiber	1	48	0.060907	0.00708364	0.000170131	0.00368102	0.00402128	0.00583086	0.000757857	0.00491834	0.000231997	9.27988e-05	0.000448528	1.54665e-05	0	3.09329e-05	0	0	1.54665e-05	3.09329e-05	0	0	0	0	0
Low-fiber_48_2	Low-fiber	2	48	0.201625	0.00237327	0.000128982	0.0094544	0.0135044	0.00868051	1.28982e-05	0.00343093	0.00171546	0.000515929	0.000490133	0.000386947	0.000180575	0.000116084	5.15929e-05	0	9.02876e-05	1.28982e-05	0	0	0	0	0
Low-fiber_48_3	Low-fiber	3	48	0.0314352	0.00023526	0.000168043	0.00207253	0.000201651	0	1.12029e-05	0	0.000280071	6.72171e-05	0.000100826	0	0.000123231	2.24057e-05	0	0.000168043	2.24057e-05	0	0	0	0	1.12029e-05	0
Low-fiber_48_4	Low-fiber	4	48	0.0136757	0.00024663	0.000443935	0.00135647	0.00376111	0	0.0020347	0	4.93261e-05	3.69946e-05	2.4663e-05	0	0	0	0	0	0	0.000197304	8.63206e-05	0	0	0	0
Con_48_1	Untreated	1	48	0.0872926	0.290452	1.52476e-05	6.09905e-05	0.00228714	7.62381e-05	0	3.04952e-05	0.000930105	0.000274457	0.000182971	0	0	4.57429e-05	0	0	4.57429e-05	0	0	0	0	0	0
Con_48_2	Untreated	2	48	0.0467418	1.4281e-05	2.8562e-05	0.000257058	0.00492695	0.000257058	0	0	0.000528398	0.00014281	1.4281e-05	0.000242777	0	2.8562e-05	0	0	1.4281e-05	0	0	0	0	0	0
Con_48_3	Untreated	3	48	0.0217956	0.00896586	0.12808	0.000843526	0.00028571	0	0	0	0.000122447	4.08158e-05	4.08158e-05	1.36053e-05	0.000448973	5.4421e-05	0	0.000176868	5.4421e-05	0	0	5.4421e-05	0	2.72105e-05	0
Con_48_4	Untreated	4	48	0.116007	0.0130832	0.267185	0.0186992	0.00607097	0	0.0119066	0	0.000752988	0.000298058	7.84363e-05	0	0	0.000282371	9.41236e-05	0	0.000407869	0.000360807	0.000219622	0.000250996	1.56873e-05	0	3.13745e-05
Blanch_48_1	Blanch	1	48	0.0676375	0.11572	1.80897e-05	5.42692e-05	0.00146527	3.61795e-05	0	7.23589e-05	0.000940666	0.000162808	7.23589e-05	0	0	1.80897e-05	0	0	1.80897e-05	0	0	0	0	0	0
Blanch_48_2	Blanch	2	48	0.0430341	0.000434688	0	0.000130406	0.00495544	0	4.34688e-05	0	4.34688e-05	4.34688e-05	0	4.34688e-05	0	0	0	0	4.34688e-05	0	0	0	0	0	0
Blanch_48_3	Blanch	3	48	0.0243932	0.00841674	0.0894163	0.000351973	0.000229547	0	0	0	4.59095e-05	6.12126e-05	1.53032e-05	0	0.000566217	6.12126e-05	0	0.000214244	7.65158e-05	0	0	1.53032e-05	0	9.18189e-05	0
Blanch_48_4	Blanch	4	48	0.119813	0.0264509	0.201834	0.0240748	0.00636614	0	0.0156912	0	0.000201744	0.000156912	0.000313824	6.7248e-05	0	0.000806976	0.000134496	0	0.000156912	0.000537984	8.9664e-05	0.000201744	2.2416e-05	0	2.2416e-05
Ferment_48_1	Ferment	1	48	0.0367341	0.43008	0	4.63815e-05	0.00162335	0.000850327	0	3.0921e-05	0.000154605	0.000123684	7.73025e-05	0	0	0	0	0	0	0	0	0	0	0	0
Ferment_48_2	Ferment	2	48	0.06968	0.00178632	2.70654e-05	0	0.00480411	0.00135327	0	0	0.000311252	0.00014886	0.000108262	0.000419514	0	5.41309e-05	1.35327e-05	0	4.05981e-05	0	0	0	0	1.35327e-05	0
Ferment_48_3	Ferment	3	48	0.0381548	0.0369444	0.108611	0.000674603	0.000257937	0	0	1.98413e-05	3.96825e-05	7.93651e-05	3.96825e-05	0	0.000178571	0.000178571	0	0.000357143	3.96825e-05	0	0	5.95238e-05	0	0	0
Ferment_48_4	Ferment	4	48	0.0731269	0.0148297	0.310326	0.0260465	0.00444512	0	0.0102521	0	0.0007377	0.000132408	0.000208069	5.67462e-05	0	0.000756616	0.000321562	0	0.000208069	0.000113492	0.000170239	0.000302646	5.67462e-05	0	0
Oven_48_1	Oven	1	48	0.108204	0.157178	0	7.97614e-05	1.59523e-05	4.78568e-05	3.19045e-05	0	0.000749757	0.000382854	6.38091e-05	0	0	0	0	0	6.38091e-05	0	0	0	0	0	0
Oven_48_3	Oven	3	48	0.0463899	0.0253722	0.0736121	0.00152284	0.00030205	0	2.51708e-05	0	0.000239123	7.55125e-05	6.29271e-05	0	0.000553759	0.000100683	0	0.000516002	6.29271e-05	0	0	3.77563e-05	0	0	0
Oven_48_4	Oven	4	48	0.0430717	0.00352673	0.00807736	0.00425484	0.00131968	0	0.00482366	0	0.000182025	6.82594e-05	2.27531e-05	2.27531e-05	0	2.27531e-05	0.000273038	0	4.55063e-05	2.27531e-05	0.000113766	0	9.10125e-05	0	0

## Sheet: Table S6
Sample_ID	Sample_nr	Medium	Donor	Time	RetentionTime(min)	Amount(g/l)	M	mM
High-fiber_24_1	25	High-fiber	1	24	15.447	4.0364	0.0448091	44.8091
High-fiber_24_2	26	High-fiber	2	24	15.453	0.33	0.00366341	3.66341		Mw of lactate (g/mol)
High-fiber_24_3	27	High-fiber	3	24	15.447	1.8391	0.0204163	20.4163		90.08
High-fiber_24_4	28	High-fiber	4	24	15.447	2.446	0.0271536	27.1536
Low-fiber_24_1	29	Low-fiber	1	24	n.a.	n.a.	0	0
Low-fiber_24_2	30	Low-fiber	2	24	n.a.	n.a.	0	0
Low-fiber_24_3	31	Low-fiber	3	24	n.a.	n.a.	0	0
Low-fiber_24_4	32	Low-fiber	4	24	n.a.	n.a.	0	0
Untreated_24_1	33	Untreated	1	24	n.a.	n.a.	0	0
Untreated_24_2	34	Untreated	2	24	n.a.	n.a.	0	0
Untreated_24_3	35	Untreated	3	24	n.a.	n.a.	0	0
Untreated_24_4	36	Untreated	4	24	n.a.	n.a.	0	0
Blanch_24_1	37	Blanch	1	24	n.a.	n.a.	0	0
Blanch_24_2	38	Blanch	2	24	n.a.	n.a.	0	0
Blanch_24_3	39	Blanch	3	24	n.a.	n.a.	0	0
Blanch_24_4	40	Blanch	4	24	n.a.	n.a.	0	0
Ferment_24_1	41	Ferment	1	24	15.452	0.2945	0.00326932	3.26932
Ferment_24_2	42	Ferment	2	24	n.a.	n.a.	0	0
Ferment_24_3	43	Ferment	3	24	n.a.	n.a.	0	0
Ferment_24_4	44	Ferment	4	24	n.a.	n.a.	0	0
Oven_24_1	45	Oven	1	24	n.a.	n.a.	0	0
Oven_24_2	46	Oven	2	24	n.a.	n.a.	0	0
Oven_24_3	47	Oven	3	24	n.a.	n.a.	0	0
Oven_24_4	48	Oven	4	24	n.a.	n.a.	0	0
High-fiber_48_1	49	High-fiber	1	48	15.447	4.0758	0.0452464	45.2464
High-fiber_48_2	50	High-fiber	2	48	n.a.	0	0	0
High-fiber_48_3	51	High-fiber	3	48	15.448	2.1212	0.023548	23.548
High-fiber_48_4	52	High-fiber	4	48	15.448	2.4497	0.0271947	27.1947
Low-fiber_48_1	53	Low-fiber	1	48	n.a.	n.a.	0	0
Low-fiber_48_2	54	Low-fiber	2	48	n.a.	n.a.	0	0
Low-fiber_48_3	55	Low-fiber	3	48	n.a.	n.a.	0	0
Low-fiber_48_4	56	Low-fiber	4	48	n.a.	n.a.	0	0
Untreated_48_1	57	Untreated	1	48	n.a.	n.a.	0	0
Untreated_48_2	58	Untreated	2	48	n.a.	n.a.	0	0
Untreated_48_3	59	Untreated	3	48	n.a.	n.a.	0	0
Untreated_48_4	60	Untreated	4	48	n.a.	n.a.	0	0
Blanch_48_1	61	Blanch	1	48	n.a.	n.a.	0	0
Blanch_48_2	62	Blanch	2	48	n.a.	n.a.	0	0
Blanch_48_3	63	Blanch	3	48	n.a.	n.a.	0	0
Blanch_48_4	64	Blanch	4	48	n.a.	n.a.	0	0
Ferment_48_1	65	Ferment	1	48	n.a.	n.a.	0	0
Ferment_48_2	66	Ferment	2	48	n.a.	n.a.	0	0
Ferment_48_3	67	Ferment	3	48	n.a.	n.a.	0	0
Ferment_48_4	68	Ferment	4	48	n.a.	n.a.	0	0
Oven_48_1	69	Oven	1	48	n.a.	n.a.	0	0
Oven_48_2	70	Oven	2	48	n.a.	n.a.	0	0
Oven_48_3	71	Oven	3	48	n.a.	n.a.	0	0
Oven_48_4	72	Oven	4	48	n.a.	n.a.	0	0
Untreated_0_0	73	Untreated	0	0	n.a.	n.a.	0	0
Blanch_0_0	74	Blanch	0	0	n.a.	n.a.	0	0
Ferment_0_0	75	Ferment	0	0	15.437	2.5521	0.0283315	28.3315
Oven_0_0	76	Oven	0	0	15.443	0.0363	0.000402975	0.402975

## Sheet: Table S7
Sample_ID	Medium	Donor	Time	Total SCFA (mM)	Total SCFA without lactate (mM)	Acetic acid (mM)	Formic acid (mM)	Propanoic acid (mM)	Isobutyric acid (mM)	Butyric acid (mM)	Isovaleric acid (mM)	2-methyl butanoic acid (mM)	Valeric acid (mM)	2-methyl pentanoic acid (mM)	3-methyl pentanoic acid (mM)	Isocaproic acid (mM)	Caproic acid (mM)	Lactate (mM)	Heptanoic acid (mM)
High-fiber_24_1	High-fiber	1	24	66.4028	21.5937	19.8426	1.36432	0.225054	0.0128574	0.124243	0	0.00994006	0.00669208	0	0	0	0.0080888	44.8091	0
High-fiber_24_2	High-fiber	2	24	52.3981	48.7347	27.7693	4.39401	0.585963	0.031988	15.7706	0.00910616	0.0389137	0.0197445	0	0	0.0941455	0.0209217	3.66341	0
High-fiber_24_3	High-fiber	3	24	70.0041	49.5878	37.4463	7.20568	0.877084	0.0318135	3.93585	0	0.01839	0.0261467	0.016046	0.00389729	0	0.0266007	20.4163	0
High-fiber_24_4	High-fiber	4	24	65.0152	37.8616	36.3755	0.891217	0.212421	0.0309926	0.298291	0	0.018646	0.0193433	0	0	0	0.0151733	27.1536	0
Low-fiber_24_1	Low-fiber	1	24	59.1996	59.1996	32.9104	0	7.29425	4.62135	6.25615	3.83286	3.27579	0.045071	0	0.0035783	0.950813	0.00939569	0	0
Low-fiber_24_2	Low-fiber	2	24	39.1879	39.1879	25.8911	0.0602142	3.20583	1.90258	2.49579	3.11898	2.38785	0.0304923	0.0148978	0.0035974	0.0540914	0.0225359	0	0
Low-fiber_24_3	Low-fiber	3	24	69.5358	69.5358	43.1353	0	6.69958	4.9776	6.30802	4.83105	3.41605	0.0538773	0	0.00431983	0.081364	0.0285729	0	0
Low-fiber_24_4	Low-fiber	4	24	64.2468	64.2468	36.318	0	9.64431	4.3697	6.13656	4.11421	3.16552	0.0483338	0	0.00407316	0.430003	0.0161284	0	0
Untreated_24_1	Untreated	1	24	45.5497	45.5497	34.7945	2.05729	4.24373	0.0905656	4.05148	0.0615525	0.135625	0.0178281	0	0.00365551	0.0818921	0.0115416	0	0
Untreated_24_2	Untreated	2	24	60.6654	60.6654	37.9699	0	2.92263	4.06171	7.73916	4.79393	3.11962	0.0226408	0.0146874	0	0	0.0212215	0	0
Untreated_24_3	Untreated	3	24	77.4685	77.4685	49.764	0	4.3327	4.57974	10.3704	4.97016	3.37284	0.0470798	0	0	0.00295181	0.0286243	0	0
Untreated_24_4	Untreated	4	24	43.0213	43.0213	29.0669	0.180466	11.3637	0.071697	2.14201	0.0392004	0.0950464	0.0339241	0	0	0.0102125	0.0182071	0	0
Blanch_24_1	Blanch	1	24	56.182	56.182	38.8886	0.0536713	3.88413	2.72288	3.53528	3.91708	3.01701	0.0138537	0.0152688	0	0.124079	0.0101758	0	0
Blanch_24_2	Blanch	2	24	57.7808	57.7808	35.9705	0	2.9842	4.15069	7.07585	4.59576	2.95696	0.022737	0	0.00405267	0	0.0200941	0	0
Blanch_24_3	Blanch	3	24	71.3841	71.3841	46.3277	0	4.10227	4.3035	8.77198	4.67096	3.11337	0.0366794	0.0166178	0.00496593	0.0101902	0.0259218	0	0
Blanch_24_4	Blanch	4	24	50.826	50.826	33.5904	0.134165	10.3434	0.108472	6.27818	0.118029	0.171976	0.0304531	0	0.00374919	0.0303111	0.0168797	0	0
Ferment_24_1	Ferment	1	24	37.5236	34.2543	28.6547	0.944003	2.03476	0.0576633	2.34889	0.0412774	0.106376	0.00843585	0	0	0.0473964	0.0107082	3.26932	0
Ferment_24_2	Ferment	2	24	52.3352	52.3352	31.5243	0	3.04278	3.08222	7.2365	4.29371	3.08274	0.0301047	0.0162604	0.00353708	0	0.0230528	0	0
Ferment_24_3	Ferment	3	24	68.8723	68.8723	43.0952	0	4.49875	4.53755	8.55977	4.79255	3.29943	0.0472505	0	0.0036787	0.0102299	0.0279505	0	0
Ferment_24_4	Ferment	4	24	34.7536	34.7536	22.7058	0.146052	10.5588	0.0583293	1.10894	0.0400298	0.0964503	0.0218281	0	0	0	0.0173921	0	0
Oven_24_1	Oven	1	24	41.0468	41.0468	33.0063	0.325003	3.25354	0.134746	3.86327	0.160643	0.211721	0.0128555	0	0	0.0690394	0.00973303	0	0
Oven_24_2	Oven	2	24	63.2807	63.2807	38.6692	0	3.12238	4.12816	9.05279	5.03279	3.22655	0.0232848	0	0.00463016	0	0.020925	0	0
Oven_24_3	Oven	3	24	73.8209	73.8209	47.2903	0	4.10118	4.49002	9.75189	4.82717	3.25273	0.0489477	0.0151245	0.00489839	0.00975225	0.0289437	0	0
Oven_24_4	Oven	4	24	39.6132	39.6132	26.4426	0.410243	10.5113	0.0585428	2.02261	0.0301349	0.0894542	0.0250243	0	0	0.00701619	0.016203	0	0
High-fiber_48_1	High-fiber	1	48	68.9512	23.7047	21.652	1.59917	0.26576	0.0152977	0.146014	0	0.010097	0.0075179	0	0	0	0.00889183	45.2464	0
High-fiber_48_2	High-fiber	2	48	52.0521	52.0521	31.3171	0	1.03373	0.184343	18.6614	0.368296	0.337047	0.0205776	0.0161759	0.00468298	0.0879139	0.0208819	0	0
High-fiber_48_3	High-fiber	3	48	72.9928	49.4448	38.5958	6.13186	0.826593	0.0319818	3.77768	0	0.0179599	0.0251769	0.013575	0	0	0.0241282	23.548	0
High-fiber_48_4	High-fiber	4	48	67.3279	40.1331	38.5415	1.01525	0.201366	0.0283868	0.29581	0	0.018216	0.0188962	0	0	0	0.0137269	27.1947	0
Low-fiber_48_1	Low-fiber	1	48	72.3058	72.3058	39.4809	0	11.5264	4.68128	8.29875	3.90965	3.40469	0.0567097	0	0.00416003	0.933097	0.0101447	0	0
Low-fiber_48_2	Low-fiber	2	48	68.5225	68.5225	38.6153	0	10.2921	4.26608	7.68849	4.3677	3.13063	0.0684154	0	0.00436391	0.0669577	0.0225166	0	0
Low-fiber_48_3	Low-fiber	3	48	74.5472	74.5472	44.8005	0	9.2378	4.66833	7.89062	4.52574	3.26396	0.0551151	0	0.00380072	0.0745956	0.0267035	0	0
Low-fiber_48_4	Low-fiber	4	48	77.4085	77.4085	43.274	0	10.5728	4.76463	6.42754	4.18036	3.2643	4.47032	0	0.0062074	0.428683	0.0196406	0	0
Untreated_48_1	Untreated	1	48	76.0259	76.0259	36.1245	0.515969	18.1457	5.05532	7.63504	4.77422	3.56543	0.0866603	0.0137668	0.00380752	0.0942508	0.0112663	0	0
Untreated_48_2	Untreated	2	48	78.4655	78.4655	46.1937	0	8.58327	4.66196	10.4036	4.9795	3.57147	0.0308503	0.0150967	0.00401666	0	0.0220275	0	0
Untreated_48_3	Untreated	3	48	89.9492	89.9492	53.5973	0	11.5368	4.81618	11.9345	4.62401	3.32286	0.0681758	0	0.00428926	0.0190388	0.0260806	0	0
Untreated_48_4	Untreated	4	48	80.2238	80.2238	49.2809	0	15.9337	1.29301	9.64922	2	1.83523	0.0813927	0	0.0037039	0.128177	0.0184455	0	0
Blanch_48_1	Blanch	1	48	83.2809	83.2809	50.7066	0.169521	12.6235	4.81068	6.80416	4.58597	3.39278	0.0280128	0.0156872	0.00399677	0.129352	0.0106079	0	0
Blanch_48_2	Blanch	2	48	79.4682	79.4682	48.9823	0	5.4653	4.77117	11.496	5.06299	3.61809	0.0301769	0.0147441	0.00415927	0	0.0231609	0	0
Blanch_48_3	Blanch	3	48	93.8583	93.8583	58.2701	0	11.1704	4.97071	10.952	4.90378	3.49435	0.0499395	0	0.00492169	0.0169496	0.0251368	0	0
Blanch_48_4	Blanch	4	48	79.8383	79.8383	46.3856	0	13.9525	3.19973	9.12312	3.90468	3.08635	0.0677252	0	0.00538014	0.0970567	0.0161963	0	0
Ferment_48_1	Ferment	1	48	79.6351	79.6351	47.6163	0.354527	15.9911	2.34527	6.90499	3.69565	2.59298	0.0401448	0	0.00399756	0.0781075	0.0119734	0	0
Ferment_48_2	Ferment	2	48	80.0777	80.0777	44.6567	0	11.3891	4.96205	10.2659	5.07392	3.64946	0.0355039	0.0140615	0.00542999	0	0.0255699	0	0
Ferment_48_3	Ferment	3	48	96.134	96.134	60.6359	0	13.2032	4.6934	9.90615	4.42539	3.142	0.0733921	0	0.0038591	0.0239218	0.0267825	0	0
Ferment_48_4	Ferment	4	48	72.9119	72.9119	44.9435	1.7502	16.5673	0.279099	8.41217	0.451855	0.448596	0.0408338	0	0	0	0.0183552	0	0
Oven_48_1	Oven	1	48	77.6922	77.6922	46.4167	0.154288	11.5567	5.05451	6.29503	4.65188	3.43285	0.0365448	0	0.00455833	0.0788584	0.0103133	0	0
Oven_48_2	Oven	2	48	80.5753	80.5753	46.7593	0	9.48255	5.08016	10.7198	4.89304	3.53962	0.0477007	0.0149753	0.00454659	0.0122493	0.0213594	0	0
Oven_48_3	Oven	3	48	90.8627	90.8627	57.0471	0.109363	9.58926	4.67079	11.3746	4.66867	3.26964	0.0762849	0	0.00475472	0.0254804	0.0267238	0	0
Oven_48_4	Oven	4	48	68.4155	68.4155	43.3375	0.282087	14.794	0.307592	8.61925	0.417694	0.469623	0.0662702	0	0.00370618	0.101446	0.016308	0	0
Untreated_0_0	Untreated	0	0	21.2188	21.2188	10.215	1.0168	2.53925	1.10864	2.48282	1.01308	1.36882	0	0	0	1.46437	0.0100198	0	0
Blanch_0_0	Blanch	0	0	0.137927	0.137927	0.0729855	0.0529333	0	0	0	0	0.00271902	0	0	0	0	0.00928918	0	0
Ferment_0_0	Ferment	0	0	28.3436	0.0120873	0	0	0	0	0	0	0.0030962	0	0	0	0	0.00899109	28.3315	0
Oven_0_0	Oven	0	0	0.415878	0.0129025	0	0	0	0	0	0	0.00295915	0	0	0	0	0.00994336	0.402975	0
															0.000974323

## Sheet: Table S8
Sample_ID	Medium	Donor	Time	pH			Time_factor	term	.y.	group1	group2	df	statistic	p	p.adj	p.adj.signif			Medium_factor	term	.y.	group1	group2	df	statistic	p	p.adj	p.adj.signif
High-fiber_0_1	High-fiber	1	0	6.735			0	Medium_factor	pH	High-fiber	Low-fiber	72	-0.848257	0.399106	0.990927	ns			High-fiber	Time_factor	pH	0	24	72	6.25352	2.54471e-08	7.63413e-08	****
High-fiber_0_2	High-fiber	2	0	6.69			0	Medium_factor	pH	High-fiber	Untreated	72	-0.802611	0.424841	0.990927	ns			High-fiber	Time_factor	pH	0	48	72	6.02909	6.42851e-08	9.64276e-08	****
High-fiber_0_3	High-fiber	3	0	6.62			0	Medium_factor	pH	High-fiber	Blanching	72	-0.859669	0.392825	0.990927	ns			High-fiber	Time_factor	pH	24	48	72	-0.224427	0.823061	0.823061	ns
High-fiber_0_4	High-fiber	4	0	6.5			0	Medium_factor	pH	High-fiber	Ferment	72	-0.74175	0.460652	0.990927	ns			Low-fiber	Time_factor	pH	0	24	72	-0.718927	0.474513	0.823061	ns
Low-fiber_0_1	Low-fiber	1	0	6.925			0	Medium_factor	pH	High-fiber	Oven	72	-0.836846	0.405448	0.990927	ns			Low-fiber	Time_factor	pH	0	48	72	-0.224427	0.823061	0.823061	ns
Low-fiber_0_2	Low-fiber	2	0	6.86			0	Medium_factor	pH	Low-fiber	Untreated	72	0.0456461	0.963719	0.990927	ns			Low-fiber	Time_factor	pH	24	48	72	0.4945	0.622459	0.823061	ns
Low-fiber_0_3	Low-fiber	3	0	6.84			0	Medium_factor	pH	Low-fiber	Blanching	72	-0.0114115	0.990927	0.990927	ns			Untreated	Time_factor	pH	0	24	72	0.228231	0.820114	0.820114	ns
Low-fiber_0_4	Low-fiber	4	0	6.85			0	Medium_factor	pH	Low-fiber	Ferment	72	0.106508	0.915476	0.990927	ns			Untreated	Time_factor	pH	0	48	72	0.585792	0.559847	0.820114	ns
Untreated_0_1	Untreated	1	0	6.925			0	Medium_factor	pH	Low-fiber	Oven	72	0.0114115	0.990927	0.990927	ns			Untreated	Time_factor	pH	24	48	72	0.357561	0.721718	0.820114	ns
Untreated_0_2	Untreated	2	0	6.87			0	Medium_factor	pH	Untreated	Blanching	72	-0.0570577	0.954657	0.990927	ns			Blanching	Time_factor	pH	0	24	72	-0.0418423	0.96674	0.96674	ns
Untreated_0_3	Untreated	3	0	6.83			0	Medium_factor	pH	Untreated	Ferment	72	0.0608615	0.951638	0.990927	ns			Blanching	Time_factor	pH	0	48	72	0.513519	0.609161	0.913741	ns
Untreated_0_4	Untreated	4	0	6.805			0	Medium_factor	pH	Untreated	Oven	72	-0.0342346	0.972785	0.990927	ns			Blanching	Time_factor	pH	24	48	72	0.555361	0.580369	0.913741	ns
Blanch_0_1	Blanch	1	0	6.945			0	Medium_factor	pH	Blanching	Ferment	72	0.117919	0.90646	0.990927	ns			Ferment	Time_factor	pH	0	24	72	-0.901511	0.370322	0.614566	ns
Blanch_0_2	Blanch	2	0	6.87			0	Medium_factor	pH	Blanching	Oven	72	0.0228231	0.981855	0.990927	ns			Ferment	Time_factor	pH	0	48	72	-0.072273	0.942585	0.942585	ns
Blanch_0_3	Blanch	3	0	6.85			0	Medium_factor	pH	Ferment	Oven	72	-0.0950961	0.924503	0.990927	ns			Ferment	Time_factor	pH	24	48	72	0.829238	0.40971	0.614566	ns
Blanch_0_4	Blanch	4	0	6.85			24	Medium_factor	pH	High-fiber	Low-fiber	72	-7.8207	3.31257e-11	2.48443e-10	****			Oven	Time_factor	pH	0	24	72	0.0798807	0.936554	0.936554	ns
Ferment_0_1	Ferment	1	0	6.93			24	Medium_factor	pH	High-fiber	Untreated	72	-6.8279	2.29175e-09	6.87526e-09	****			Oven	Time_factor	pH	0	48	72	0.24725	0.805419	0.936554	ns
Ferment_0_2	Ferment	2	0	6.865			24	Medium_factor	pH	High-fiber	Blanching	72	-7.15503	5.71783e-10	2.85892e-09	****			Oven	Time_factor	pH	24	48	72	0.167369	0.867549	0.936554	ns
Ferment_0_3	Ferment	3	0	6.83			24	Medium_factor	pH	High-fiber	Ferment	72	-7.89678	2.38925e-11	2.48443e-10	****
Ferment_0_4	Ferment	4	0	6.805			24	Medium_factor	pH	High-fiber	Oven	72	-7.01049	1.05726e-09	3.96472e-09	****
Oven_0_1	Oven	1	0	6.94			24	Medium_factor	pH	Low-fiber	Untreated	72	0.992803	0.324131	0.690978	ns
Oven_0_2	Oven	2	0	6.87			24	Medium_factor	pH	Low-fiber	Blanching	72	0.665673	0.507747	0.692383	ns
Oven_0_3	Oven	3	0	6.85			24	Medium_factor	pH	Low-fiber	Ferment	72	-0.0760769	0.939569	0.939569	ns
Oven_0_4	Oven	4	0	6.855			24	Medium_factor	pH	Low-fiber	Oven	72	0.810219	0.420484	0.690978	ns
High-fiber_24_1	High-fiber	1	24	4.295			24	Medium_factor	pH	Untreated	Blanching	72	-0.327131	0.744518	0.930648	ns
High-fiber_24_2	High-fiber	2	24	5.28			24	Medium_factor	pH	Untreated	Ferment	72	-1.06888	0.288694	0.690978	ns
High-fiber_24_3	High-fiber	3	24	4.435			24	Medium_factor	pH	Untreated	Oven	72	-0.182585	0.855637	0.939569	ns
High-fiber_24_4	High-fiber	4	24	4.27			24	Medium_factor	pH	Blanching	Ferment	72	-0.74175	0.460652	0.690978	ns
Low-fiber_24_1	Low-fiber	1	24	7.125			24	Medium_factor	pH	Blanching	Oven	72	0.144546	0.885473	0.939569	ns
Low-fiber_24_2	Low-fiber	2	24	7.01			24	Medium_factor	pH	Ferment	Oven	72	0.886296	0.378409	0.690978	ns
Low-fiber_24_3	Low-fiber	3	24	6.99			48	Medium_factor	pH	High-fiber	Low-fiber	72	-7.10178	7.17252e-10	1.07588e-08	****
Low-fiber_24_4	Low-fiber	4	24	7.25			48	Medium_factor	pH	High-fiber	Untreated	72	-6.24591	2.6263e-08	7.8789e-08	****
Untreated_24_1	Untreated	1	24	7.01			48	Medium_factor	pH	High-fiber	Blanching	72	-6.37524	1.53387e-08	5.752e-08	****
Untreated_24_2	Untreated	2	24	6.5			48	Medium_factor	pH	High-fiber	Ferment	72	-6.84312	2.14895e-09	1.61171e-08	****
Untreated_24_3	Untreated	3	24	6.42			48	Medium_factor	pH	High-fiber	Oven	72	-6.61869	5.53602e-09	2.76801e-08	****
Untreated_24_4	Untreated	4	24	7.11			48	Medium_factor	pH	Low-fiber	Untreated	72	0.855865	0.394912	0.881851	ns
Blanch_24_1	Blanch	1	24	6.945			48	Medium_factor	pH	Low-fiber	Blanching	72	0.726534	0.469867	0.881851	ns
Blanch_24_2	Blanch	2	24	6.48			48	Medium_factor	pH	Low-fiber	Ferment	72	0.258661	0.796635	0.881851	ns
Blanch_24_3	Blanch	3	24	6.57			48	Medium_factor	pH	Low-fiber	Oven	72	0.483088	0.630499	0.881851	ns
Blanch_24_4	Blanch	4	24	7.3			48	Medium_factor	pH	Untreated	Blanching	72	-0.129331	0.897457	0.897457	ns
Ferment_24_1	Ferment	1	24	7.175			48	Medium_factor	pH	Untreated	Ferment	72	-0.597204	0.552245	0.881851	ns
Ferment_24_2	Ferment	2	24	6.845			48	Medium_factor	pH	Untreated	Oven	72	-0.372777	0.71041	0.881851	ns
Ferment_24_3	Ferment	3	24	6.905			48	Medium_factor	pH	Blanching	Ferment	72	-0.467873	0.641289	0.881851	ns
Ferment_24_4	Ferment	4	24	7.365			48	Medium_factor	pH	Blanching	Oven	72	-0.243446	0.808352	0.881851	ns
Oven_24_1	Oven	1	24	7.225			48	Medium_factor	pH	Ferment	Oven	72	0.224427	0.823061	0.881851	ns
Oven_24_2	Oven	2	24	6.56
Oven_24_3	Oven	3	24	6.57
Oven_24_4	Oven	4	24	7.165
High-fiber_48_1	High-fiber	1	48	4.305
High-fiber_48_2	High-fiber	2	48	5.455
High-fiber_48_3	High-fiber	3	48	4.425
High-fiber_48_4	High-fiber	4	48	4.34
Low-fiber_48_1	Low-fiber	1	48	7.095
Low-fiber_48_2	Low-fiber	2	48	6.815
Low-fiber_48_3	Low-fiber	3	48	6.84
Low-fiber_48_4	Low-fiber	4	48	6.955
Untreated_48_1	Untreated	1	48	6.95
Untreated_48_2	Untreated	2	48	6.795
Untreated_48_3	Untreated	3	48	6.325
Untreated_48_4	Untreated	4	48	6.835
Blanch_48_1	Blanch	1	48	6.955
Blanch_48_2	Blanch	2	48	6.5
Blanch_48_3	Blanch	3	48	6.49
Blanch_48_4	Blanch	4	48	6.77
Ferment_48_1	Ferment	1	48	6.965
Ferment_48_2	Ferment	2	48	7.1
Ferment_48_3	Ferment	3	48	6.29
Ferment_48_4	Ferment	4	48	6.93
Oven_48_1	Oven	1	48	7
Oven_48_2	Oven	2	48	6.865
Oven_48_3	Oven	3	48	6.37
Oven_48_4	Oven	4	48	7.07
